# Supplementary material
Source: PubMed Central journal article supplement (PMC10718586)
Supplement: MD-014-D3MD00431G-s001.pdf [file MD-014-D3MD00431G-s001.pdf]

## Supplementary Information

# A Silicon-containing Aryl/penta-1,4-dien-3-one/amine Hybrid Exhibits Antiproliferative Effects on Breast Cancer Cells by Targeting HSP90 C-terminus without Inducing the Heat-shock Response

Yu-Ting Liao,<sup>a,†</sup> Xin-Ye Du,<sup>a,b,†</sup> Mei Wang,<sup>a,†</sup> Chun-Xia Zheng,<sup>a</sup> Dashan Li,<sup>a</sup> Chuan-Huizi Chen,<sup>a</sup> Rong-Tao Li,<sup>b,\*</sup> and Li-Dong Shao<sup>a,\*</sup>

<sup>a</sup> Yunnan Key Laboratory of Southern Medicinal Resources, School of Chinese Materia Medica, Yunnan University of Chinese Medicine, Kunming, 650500, China. Email: [shaolidong@ynutcm.edu.cn](mailto:shaolidong@ynutcm.edu.cn) (L.-D. Shao)

<sup>b</sup> Faculty of Life Science and Technology, Kunming University of Science and Technology, Kunming, 650500, China. Email: [rongtaolikm@163.com](mailto:rongtaolikm@163.com) (R.-T. Li)

<sup>†</sup> These authors were contributed equally.

## Table of Contents

|                                                                                         |    |
|-----------------------------------------------------------------------------------------|----|
| 1. General procedure for synthesis of <b>1o-1</b> , <b>1p-1</b> , and <b>1z-1</b> ..... | 2  |
| 2. Cellular assays.....                                                                 | 4  |
| 2.1 Determination the IC50s of the hybrids <b>1</b> .....                               | 4  |
| 2.2 Western blot analysis.....                                                          | 6  |
| 3 Enzyme-based assays.....                                                              | 9  |
| 3.1 Fluorescence Polarization.....                                                      | 9  |
| 3.2 Alphascreen-Based HSP90 C-Terminal Inhibition.....                                  | 9  |
| 4. The <sup>1</sup> H and <sup>13</sup> C NMR spectra of synthetic compounds.....       | 11 |
| 5. HPLC traces of synthetic compounds for biological evaluation.....                    | 49 |
| 6. References.....                                                                      | 67 |

1. General procedure for synthesis of **1o-1**, **1p-1**, and **1z-1**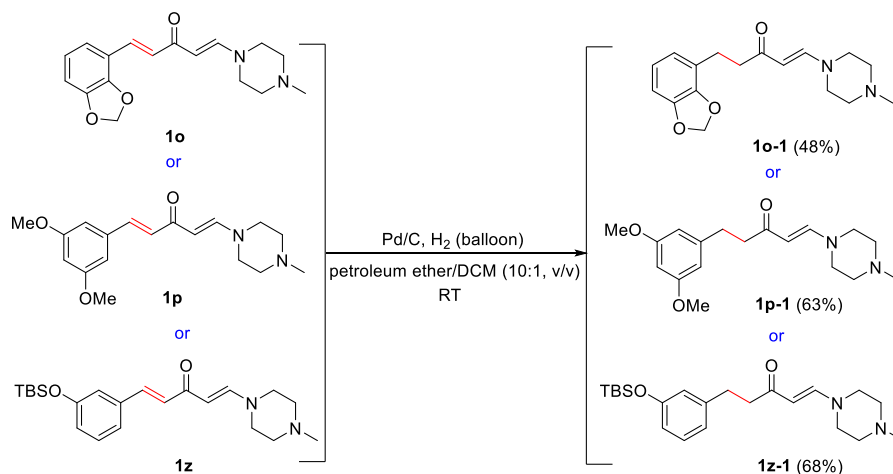Scheme S1. Synthesis of **1o-1**, **1p-1**, and **1z-1**.

A solution of hybrids **1o** or **1p** or **1z** (0.1 mmol) and Pd/C (2 mg, 10% on activated carbon) in petroleum ether/DCM (2 mL, 10:1, v/v) was stirred under H<sub>2</sub> (balloon) atmosphere at room temperature for 1 h. The reaction mixture was passed through a short pad of Celite<sup>®</sup> and washed by DCM (2 mL × 5). The combined organic layer was concentrated in vacuo. The residue was purified by silica gel column chromatography (DCM/MeOH/diethylamine = 100:1:1, v/v) to afford hybrids **1o-1** or **1p-1** or **1z-1**.

(*E*)-5-(benzo[d][1,3]dioxol-4-yl)-1-(4-methylpiperazin-1-yl)pent-1-en-3-one (**1o-1**) (48% yield); yellow oil. <sup>1</sup>H NMR (500 MHz, CDCl<sub>3</sub>) δ 7.44 (d, *J* = 12.9 Hz, 1H), 6.75 – 6.63 (m, 3H), 5.91 (s, 2H), 5.14 (d, *J* = 12.9 Hz, 1H), 3.27 (brs, 4H), 2.93 – 2.81 (m, 2H), 2.71 – 2.59 (m, 2H), 2.44 – 2.36 (m, 4H), 2.30 (s, 3H). <sup>13</sup>C NMR (125 MHz, CDCl<sub>3</sub>) δ 197.2, 151.1, 147.0, 145.5, 123.5, 122.7, 121.5, 106.6, 100.6, 95.7, 54.4 (×4), 46.2, 41.2, 25.5. HRESI-MS calculated for [M+H]<sup>+</sup> C<sub>17</sub>H<sub>23</sub>N<sub>2</sub>O<sub>3</sub><sup>+</sup> (*m/z*): 303.1703; found: 303.1708. HPLC purity: >99.9% (*t*<sub>R</sub> = 4.45 min).

(*E*)-5-(3,5-dimethoxyphenyl)-1-(4-methylpiperazin-1-yl)pent-1-en-3-one (**1p-1**) (63% yield); yellow oil. <sup>1</sup>H NMR (500 MHz, CDCl<sub>3</sub>) δ 7.44 (d, *J* = 12.9 Hz, 1H), 6.37 (d, *J* = 2.2 Hz, 2H), 6.28 (t, *J* = 2.2 Hz, 1H), 5.14 (d, *J* = 12.9 Hz, 1H), 3.76 (s, 6H), 3.28 (s, 4H), 2.89 – 2.84 (m, 2H), 2.64 (dd, *J* = 9.1, 7.0 Hz, 2H), 2.44 – 2.38 (m, 4H), 2.31 (s, 3H). <sup>13</sup>C NMR (125 MHz, CDCl<sub>3</sub>) δ 197.2, 160.9 (×2), 151.1, 144.7, 106.6 (×2), 98.2, 96.0, 55.4, 54.4 (×4), 46.2, 43.3, 32.0, 29.8. *m/z*: [M+H]<sup>+</sup> calcd for C<sub>18</sub>H<sub>27</sub>N<sub>2</sub>O<sub>3</sub><sup>+</sup>,

## Supplementary Information

---

319.2016, found, 319.2018. HPLC purity: >99.9% ( $t_R = 4.30$  min).

(*E*)-5-(3-((tert-butyl)dimethylsilyloxy)phenyl)-1-(4-methylpiperazin-1-yl)pent-1-en-3-one (**1z-1**) (68% yield); yellow oil.  $^1\text{H}$  NMR (500 MHz,  $\text{CDCl}_3$ )  $\delta$  7.44 (d,  $J = 12.9$  Hz, 1H), 7.11 (t,  $J = 7.8$  Hz, 1H), 6.80 (d,  $J = 7.6$  Hz, 1H), 6.69 (s, 1H), 6.65 (dd,  $J = 8.0, 2.1$  Hz, 1H), 5.14 (d,  $J = 12.9$  Hz, 1H), 3.29 (s, 4H), 2.94 – 2.82 (m, 2H), 2.68 – 2.58 (m, 2H), 2.46 – 2.38 (m, 4H), 2.31 (s, 3H), 0.98 (d,  $J = 2.7$  Hz, 9H), 0.18 (s, 6H).  $^{13}\text{C}$  NMR (125 MHz,  $\text{CDCl}_3$ )  $\delta$  197.4, 155.8, 151.2, 143.7, 129.3, 121.5, 120.3, 117.6, 96.0, 54.4 ( $\times 4$ ), 46.2, 43.4, 31.7, 25.9 ( $\times 3$ ), 18.3, -4.2 ( $\times 2$ ).  $m/z$ :  $[\text{M}+\text{H}]^+$  calcd for  $\text{C}_{22}\text{H}_{37}\text{N}_2\text{O}_2\text{Si}^+$ , 389.2619, found, 389.2620. HPLC purity: 99.5% ( $t_R = 14.06$  min).

## 2. Cellular assays

### 2.1 Determination the IC<sub>50</sub>s of the hybrids 1.

MCF-7, HCC1806, MDA-MB-231, MDA-MB-468, SKBr3, and BT474 were purchased Cell Bank, Type Culture Collection, Chinese Academy of Sciences (Shanghai, China). Cells were cultured in MEM (Gibco, Beijing, China) with 10% fetal bovine serum (Gibco, Grand Island), supplemented with 1% Glutamax, 1% Non-essential Amino Acids, 1% Sodium Pyruvate 100 mM Solution (Gibco, Beijing, China) and 0.1% human recombinant insulin (VivaCell, Shanghai, China) and maintained in humidified atmosphere of 5% CO<sub>2</sub> at 37°C.

Cell viability after treatments of tested compounds (20 μM) was evaluated by MTT assay according to our previous work.[1] Cells were treated with the indicated compounds at concentrations of 0.625, 1.25, 2.5, 5.0, 10.0 and 20.0 μM in 96-well plates. After 48 h, MTT solution was added to each well, for a final concentration of 20%. Cells were then incubated at 37 °C for 4 h and the absorbance was measured at 570 nm by spectrophotometry. The IC<sub>50</sub> values were determined by non-linear regression analysis using GraphPad Prism 5 software (GraphPad, Inc., San Diego, CA).

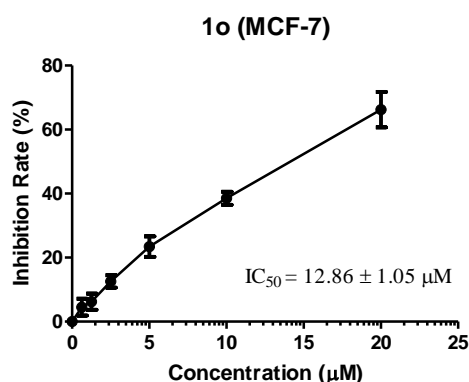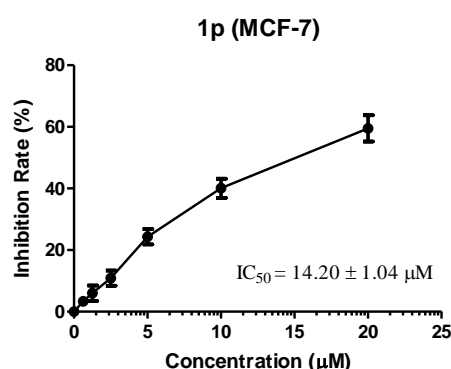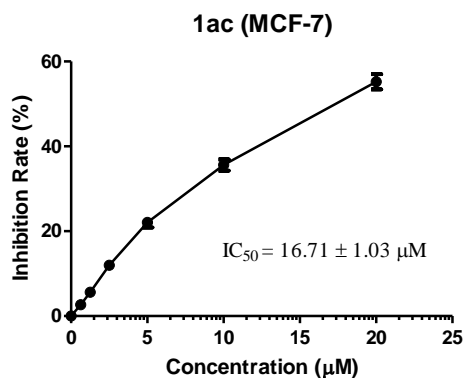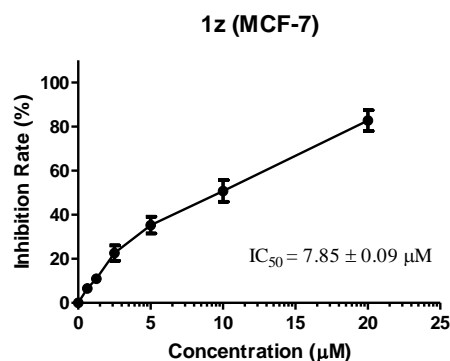

# Supplementary Information

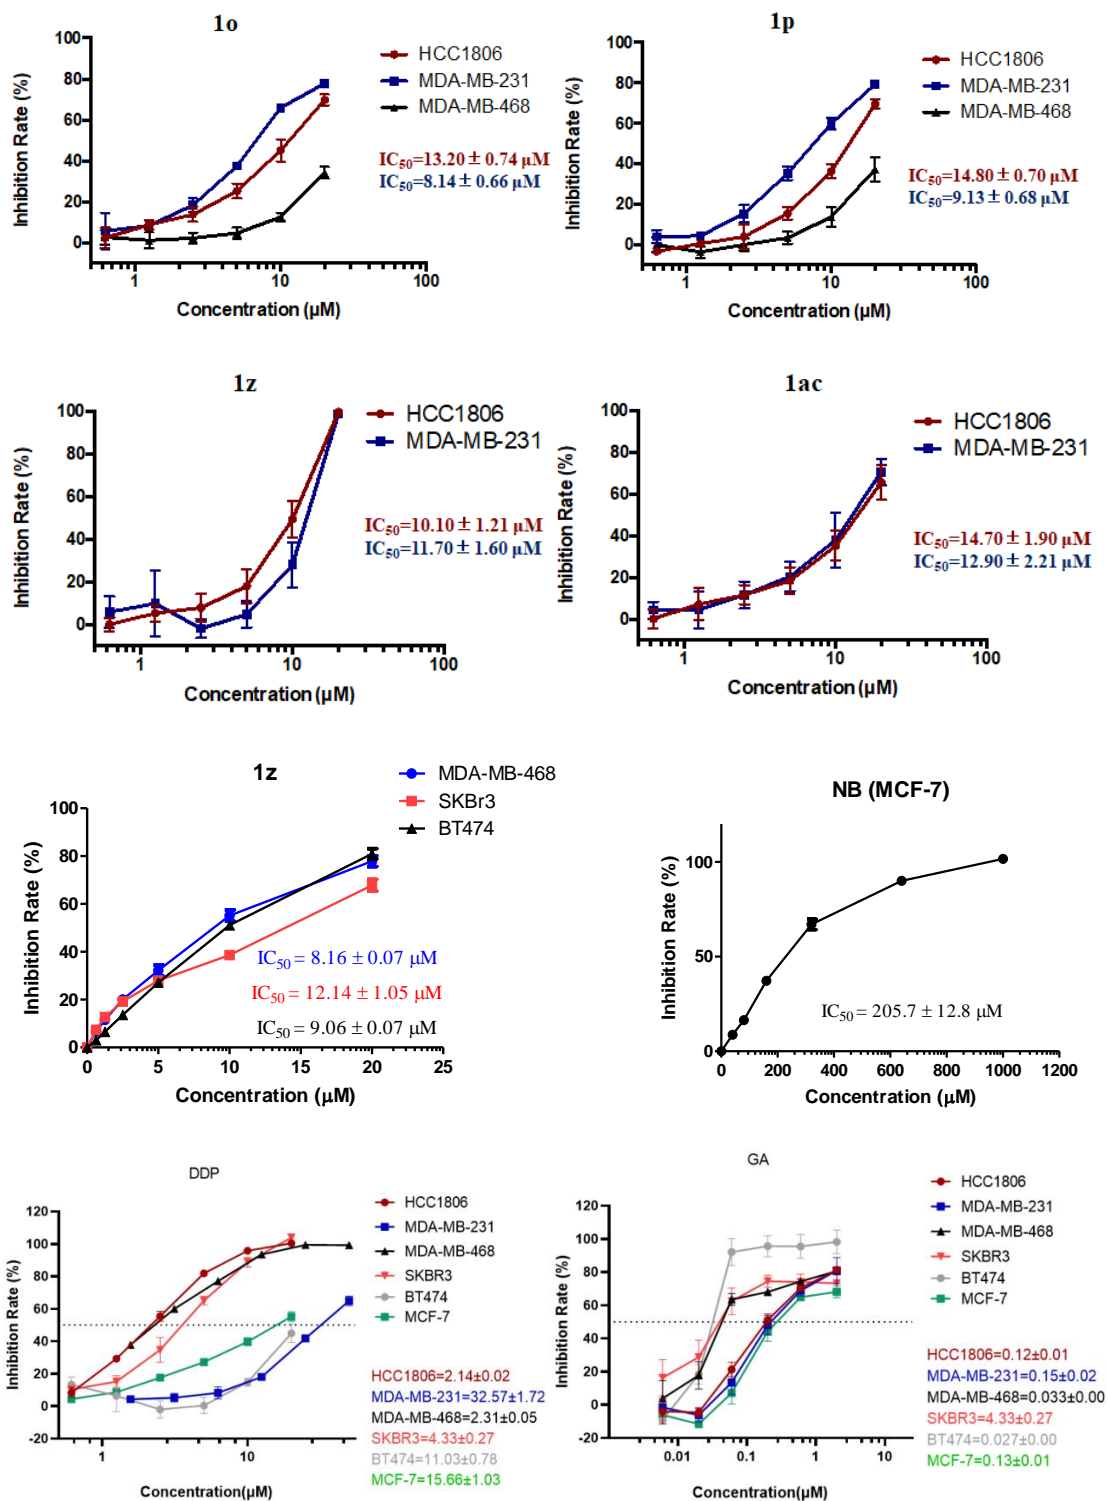

## Supplementary Information

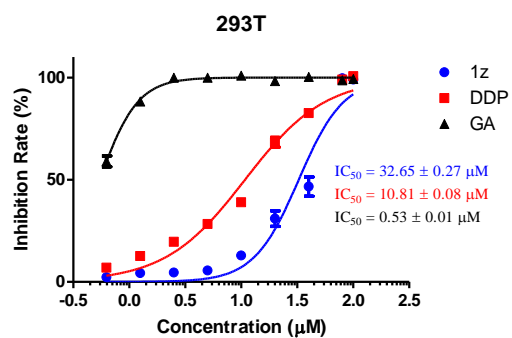

Fig. S1  $\text{IC}_{50}$  curves of tested compounds.

### 2.2 Western blot analysis

**Antibodies:** Primary antibodies targeted HER2, HSP70, HSP90, CDK4, AKT, pAKT, Caspase3, CL-Caspase3, PARP, Caspase8 (Cell Signaling, CA, USA), EGFR, and GAPDH (Proteintech Group, Chicago, USA). Secondary antibodies were HRP-linked anti-rat (Cell Signaling, CA, USA), and HRP-conjugated Affinipure Goat Anti-rabbit IgG and FITC-conjugated Affinipure Goat Anti-Rat IgG (Proteintech Group, Chicago, USA). The raw, unprocessed, representative western blot data as follow:

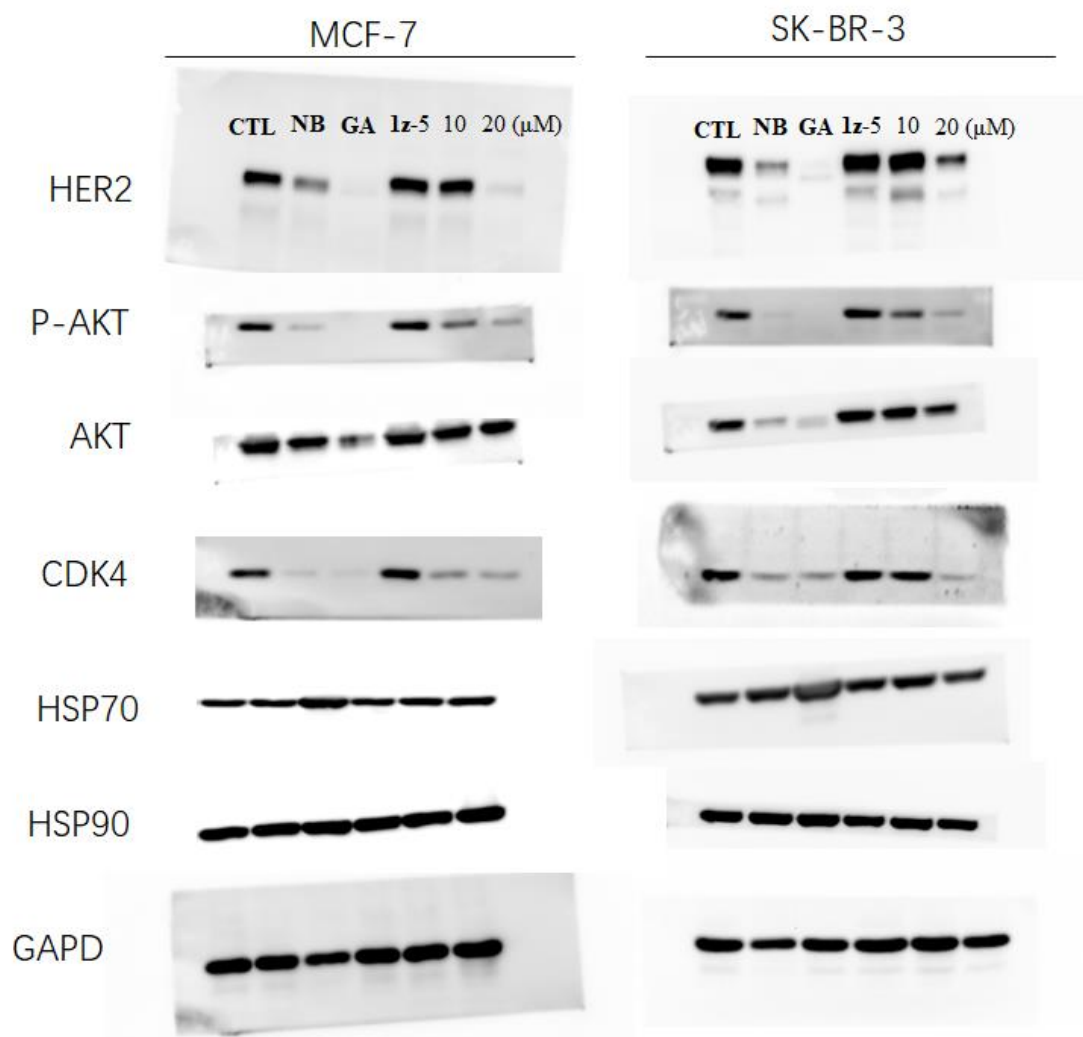

## Supplementary Information

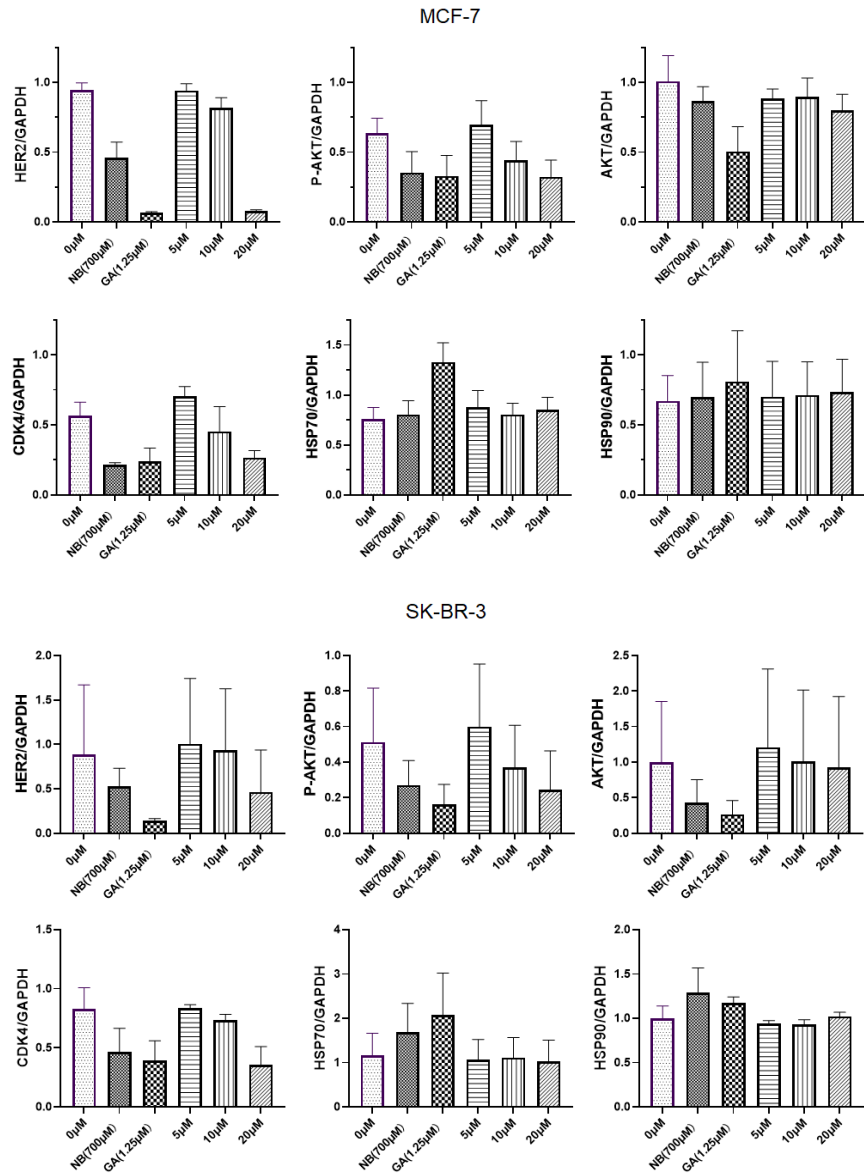

Analysis of the density ratios of HER2, P-AKT, AKT, CDK4, HSP70, HSP90 to GAPDH by Image

J. Data are represented as the mean  $\pm$  SD of three independent experiments.

## Supplementary Information

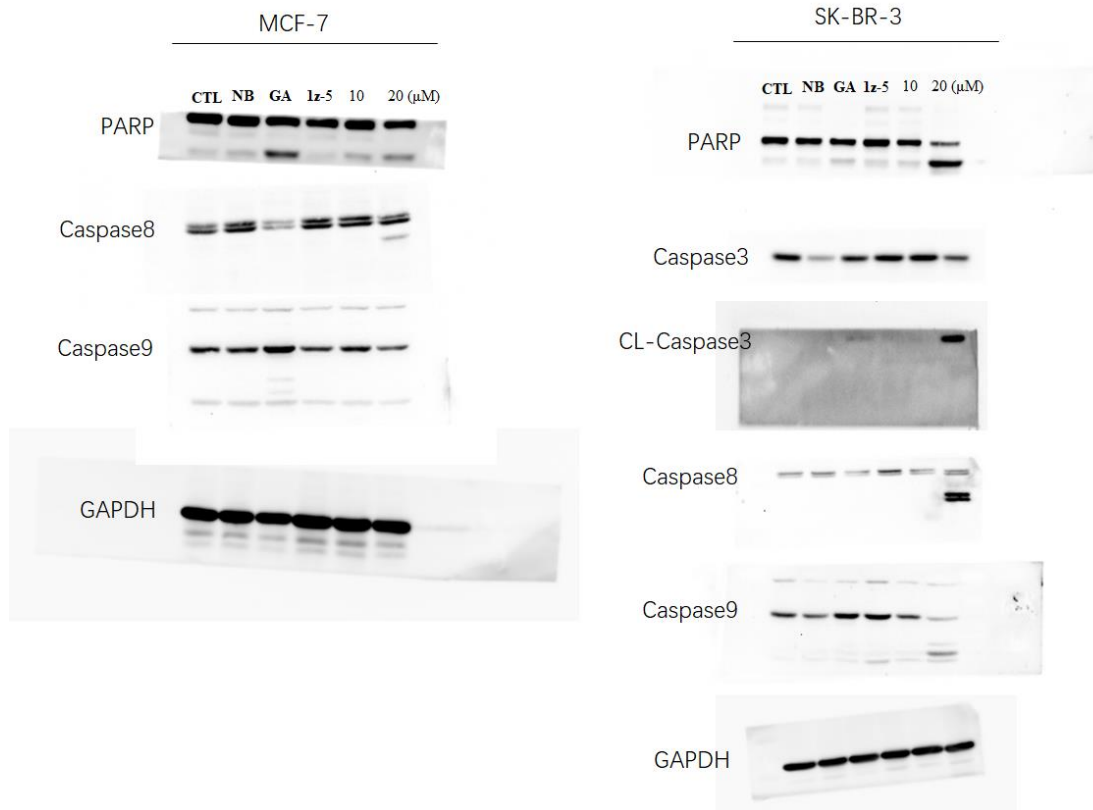



## Supplementary Information

### 3 Enzyme-based assays

#### 3.1 Fluorescence Polarization

The tested compounds were dissolved in DMSO and then appropriately diluted to obtain a gradient concentration (0.03 – 16.0  $\mu\text{M}$ ) for addition to the final reaction system. The HSP90 reaction system consisted of HSP90 $\alpha$  (10 nM), BSA (1%), FITC-GA (5 nM), and reaction buffer.[2] After thoroughly mixing of all components (DMSO < 1%), the reaction system was incubated at room temperature for 3 h. Subsequently, the fluorescence was measured at 485 nm excitation wavelength and 530 nm emission wavelength using SpectraMax M5 plate reader. HSP90 NTD Activity% =  $(\text{FP}_{\text{drug}} - \text{FP}_{\text{background}}) / (\text{FP}_{\text{enzyme}} - \text{FP}_{\text{background}}) \times 100\%$ . Curve fitting was performed using Graphpad Prism 5.

**Table S1.** The HSP90 NTD Activity (%)

| Concentration ( $\mu\text{M}$ ) | CTL |     | GA |    | 1z  |     |
|---------------------------------|-----|-----|----|----|-----|-----|
| 0                               | 98  | 100 | 99 | 97 | 99  | 101 |
| 0.030                           | 97  | 99  | 96 | 98 | 98  | 97  |
| 0.060                           | 101 | 98  | 84 | 87 | 99  | 102 |
| 0.12                            | 98  | 97  | 64 | 70 | 96  | 98  |
| 0.24                            | 101 | 97  | 43 | 38 | 100 | 99  |
| 0.48                            | 99  | 98  | 20 | 16 | 97  | 98  |
| 0.96                            | 100 | 99  | 4  | 8  | 99  | 98  |
| 2.00                            | 98  | 97  | 1  | 4  | 100 | 99  |
| 4.00                            | 101 | 99  | 2  | 1  | 99  | 101 |
| 8.00                            | 100 | 98  | 1  | 1  | 98  | 97  |
| 16.00                           | 102 | 99  | 3  | 2  | 100 | 96  |

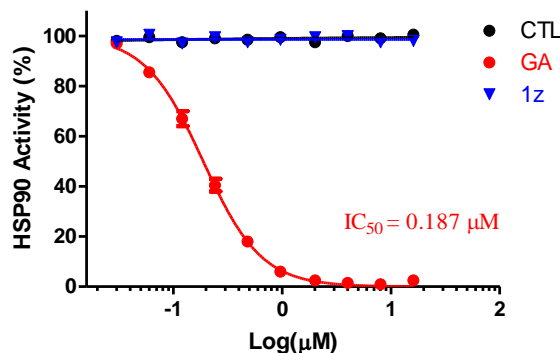

#### 3.2 Alphascreen-Based HSP90 C-Terminal Inhibition.

The HSP90 C-terminal inhibitory activity was determined by a modified Alphascreen assay system (PerkinElmer, Waltham, MA) according to our previous work.[1] Glutathione acceptor beads were added to the mixture, which was then incubated for another 30 min. Streptavidin-coated donor beads were added and mixed gently. Compound 1z (0 – 1000  $\mu\text{M}$ ), GA (0 – 1000  $\mu\text{M}$ ), and NB (0 – 1000  $\mu\text{M}$ ) in DMSO were added into the final reaction system. The system was incubated for 10 min, and the fluorescence of each well was measured in a 2390 EnSpire Alpha Reader with excitation at 680 nm and emission in the range of 520–620 nm. HSP90 CTD Activity% =  $(A_{\text{drug}} - A_{\text{background}}) / (A_{\text{enzyme}} -$

## Supplementary Information

$A_{\text{background}} \times 100\%$ .

**Table S2.** The HSP90 CTD Activity (%) for tested compounds (100  $\mu\text{M}$ )

| CTL   | NB   | 1z   |
|-------|------|------|
| 102.1 | 43.5 | 38.1 |
| 99.9  | 48.2 | 32.6 |
| 102.3 | 38.7 | 28.4 |

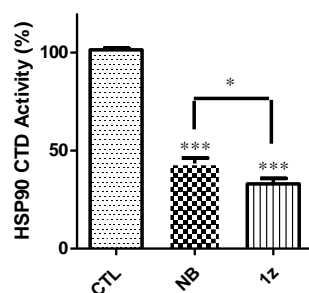

**Table S3.** The HSP90 CTD Activity (%) for tested compounds (0 - 1000  $\mu\text{M}$ )

| Concentration ( $\mu\text{M}$ ) | CTL | GA  | NB  | 1z  |
|---------------------------------|-----|-----|-----|-----|
| 0                               | 102 | 99  | 103 | 97  |
| 0.10                            | 104 | 105 | 105 | 98  |
| 0.33                            | 101 | 103 | 101 | 103 |
| 1.0                             | 99  | 96  | 99  | 101 |
| 3.3                             | 101 | 105 | 97  | 99  |
| 10.0                            | 103 | 100 | 99  | 98  |
| 33.0                            | 100 | 97  | 102 | 102 |
| 100                             | 97  | 99  | 104 | 100 |
| 333                             | 101 | 105 | 99  | 96  |
| 1000                            | 103 | 102 | 100 | 99  |

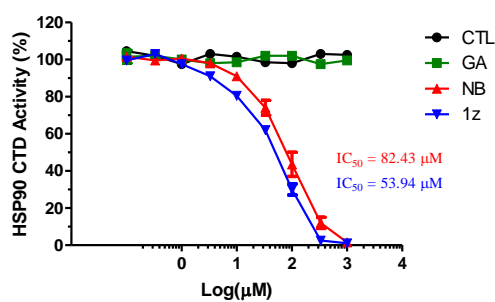

## Supplementary Information

### 4. The $^1\text{H}$ and $^{13}\text{C}$ NMR spectra of synthetic compounds

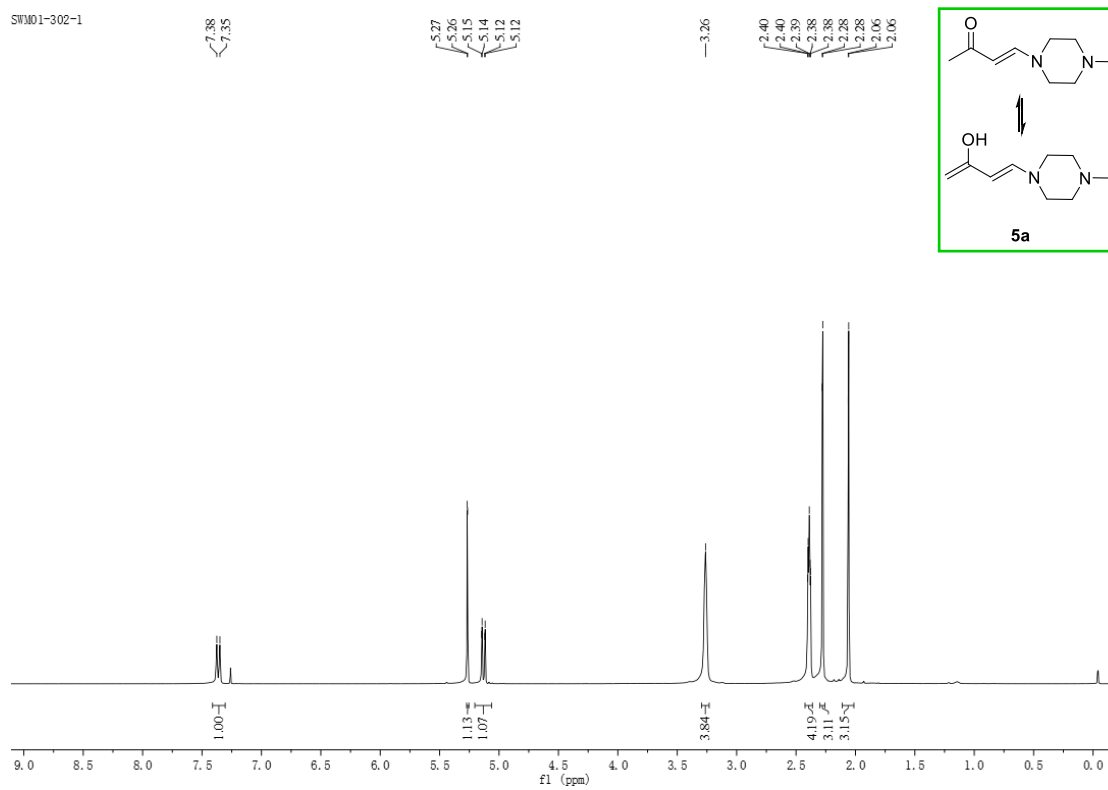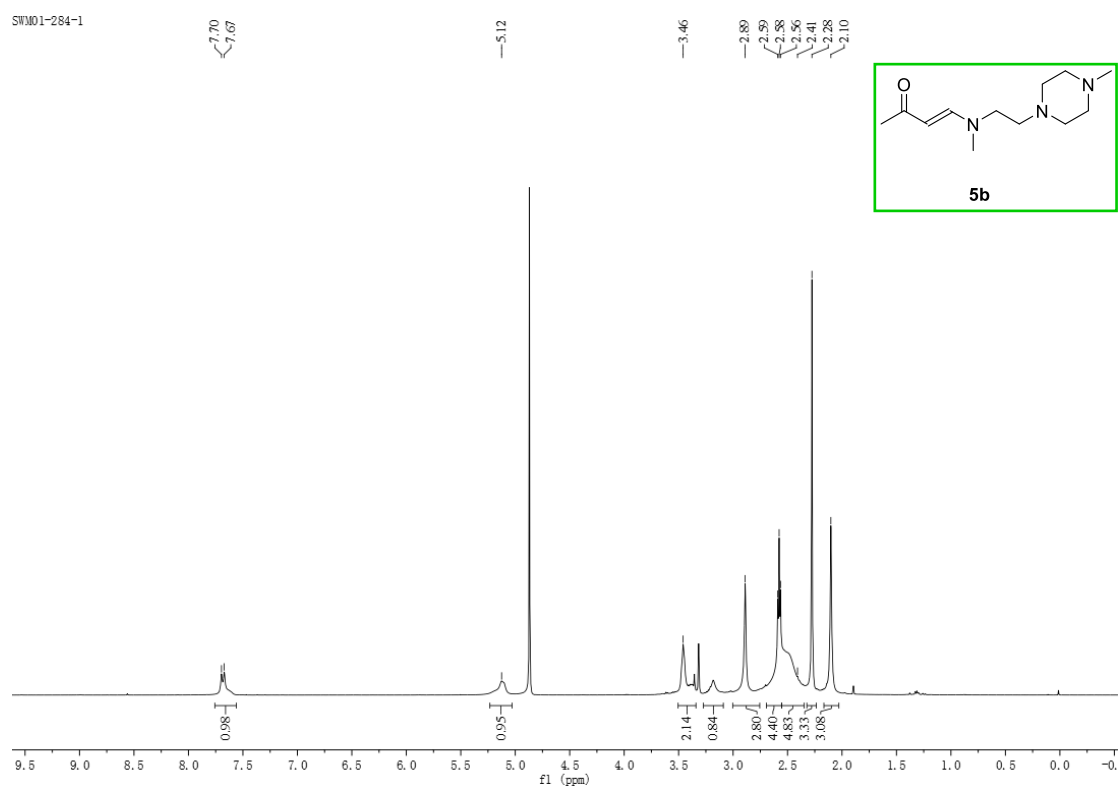

# Supplementary Information

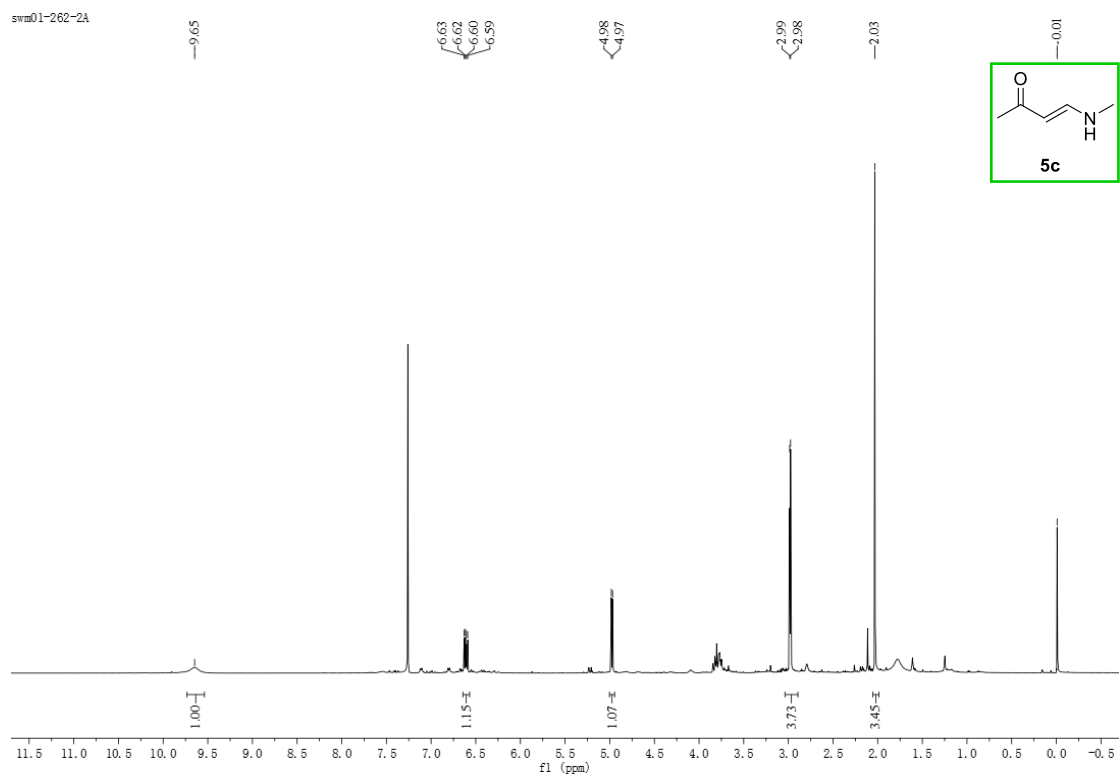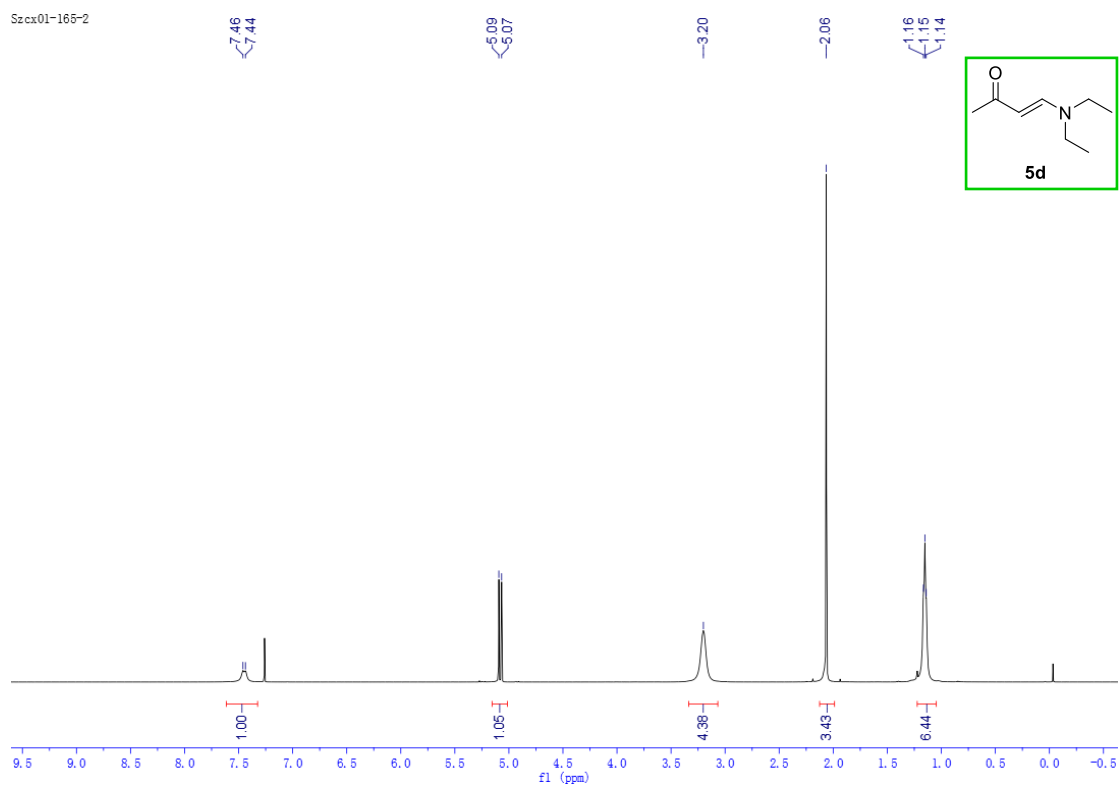

# Supplementary Information

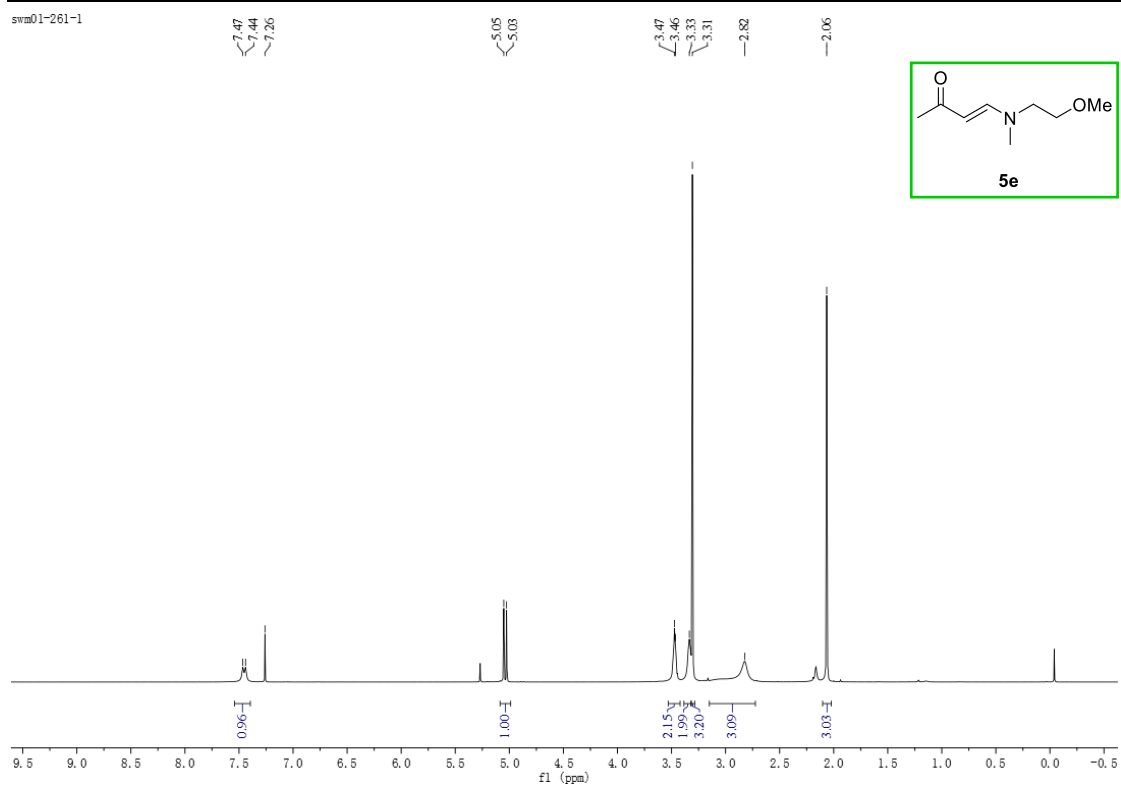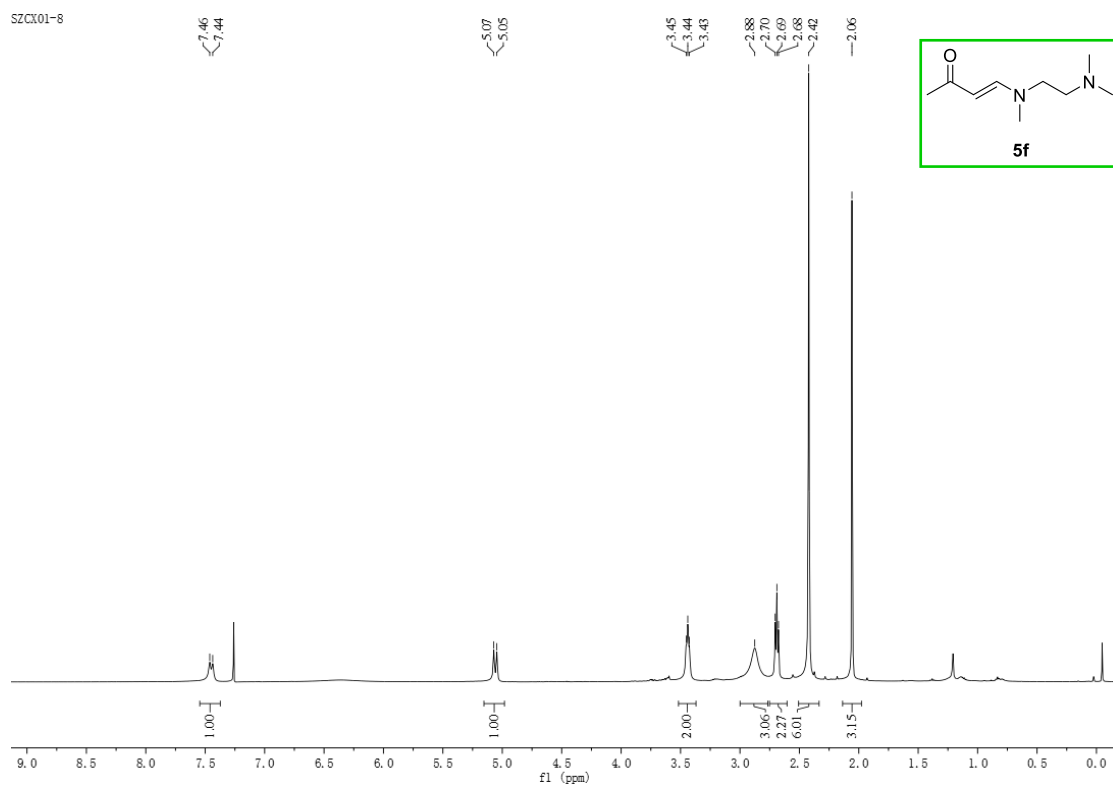

# Supplementary Information

SIM01-74-1

7.68  
7.65  
7.51  
7.48  
7.11  
7.10  
7.09  
7.07  
6.84  
6.83  
6.65  
6.62  
5.40  
5.38  
3.92  
3.91  
3.89  
3.88  
3.85  
3.37  
2.45  
2.44  
2.43  
2.31  
2.30

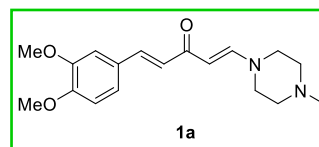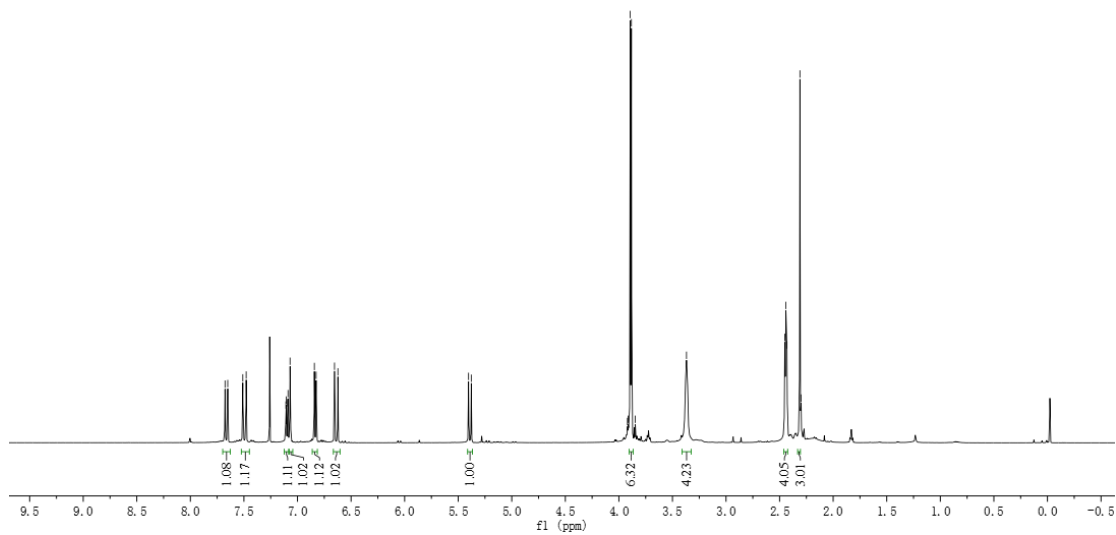

SWM01-74-1

187.0  
151.8  
150.4  
149.1  
138.9  
128.7  
126.4  
122.2  
111.1  
109.7  
96.1  
56.0  
55.9  
54.4  
46.2

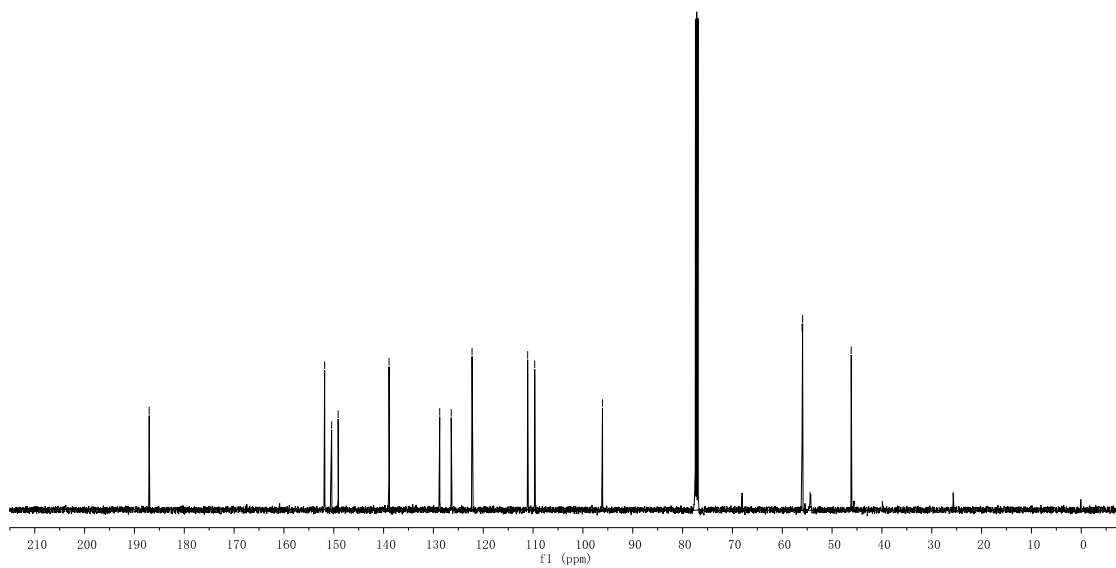

# Supplementary Information

SWM01-80-2

7.88  
7.85  
7.66  
7.63  
7.41  
6.79  
6.79  
6.76  
5.45  
5.42  
3.84  
3.36  
3.37  
3.36  
2.89  
2.84  
2.86  
2.45  
2.44  
2.32  
2.06  
2.07  
2.05

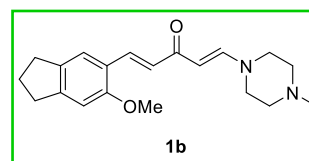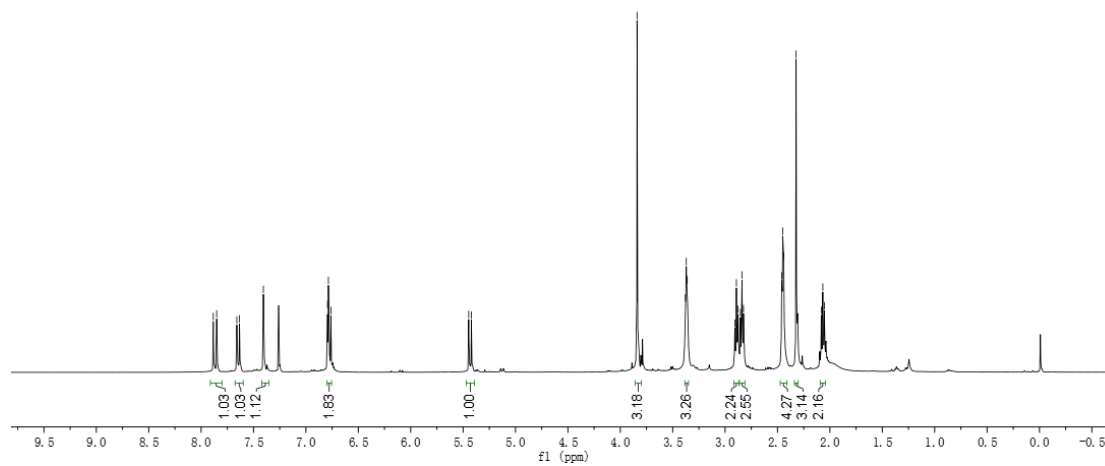

SWM01-80-2

188.0  
157.5  
151.7  
147.7  
136.1  
134.8  
127.8  
123.6  
122.7  
107.6  
96.2  
55.8  
54.4  
46.2  
33.7  
32.1  
25.8

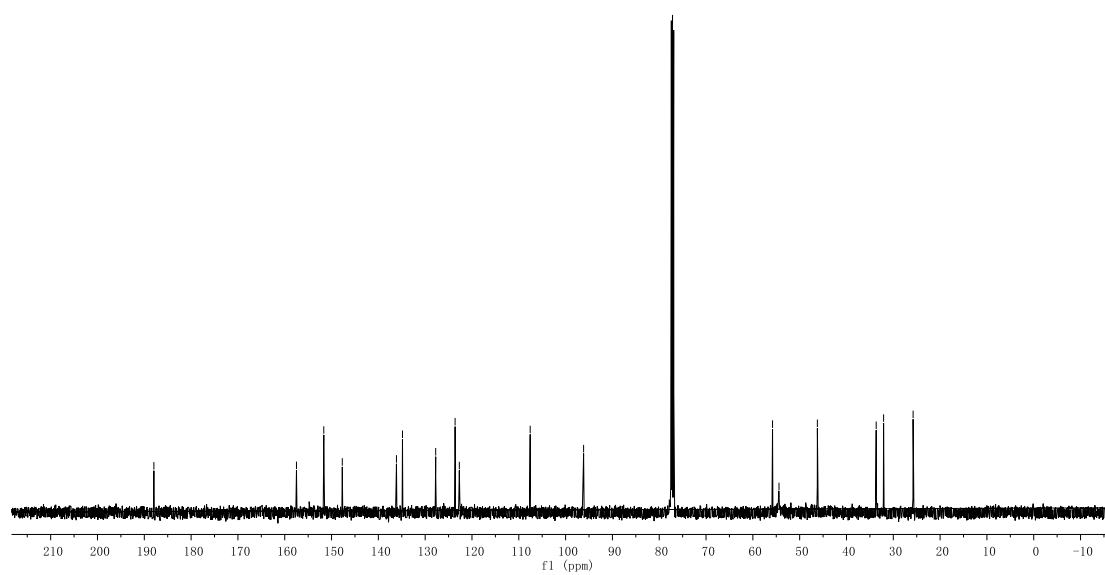

# Supplementary Information

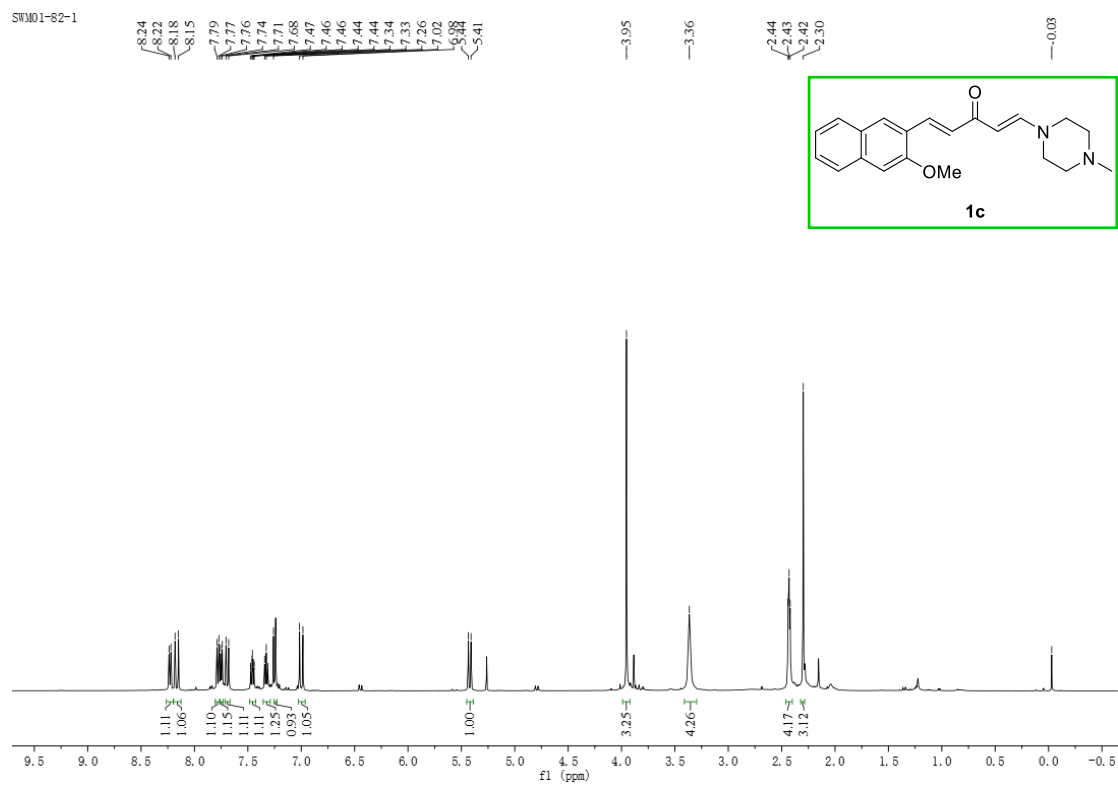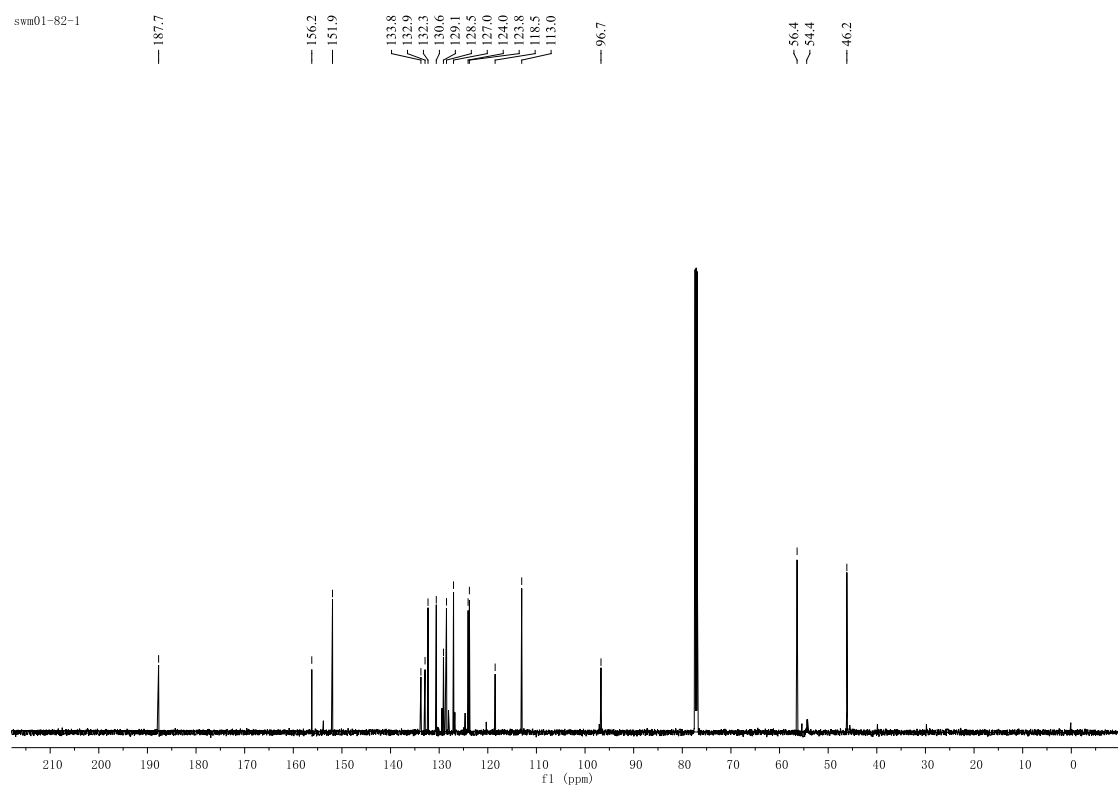



# Supplementary Information

SWM01-85-2

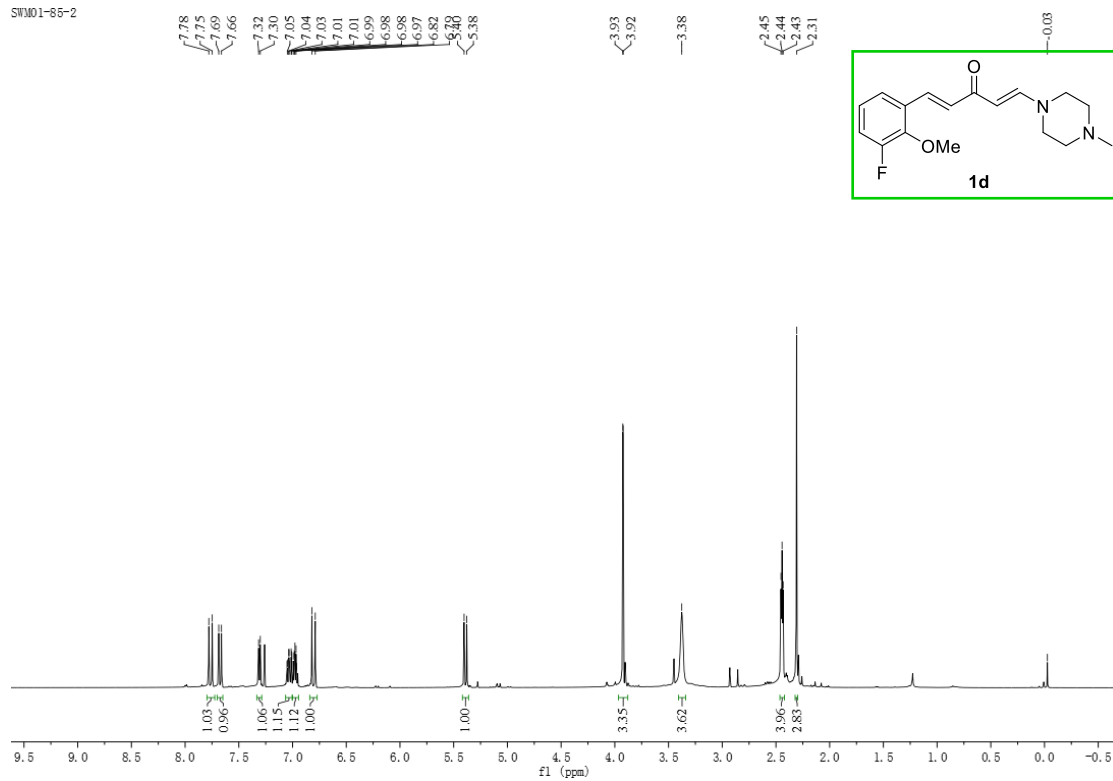

SWM01-85-2

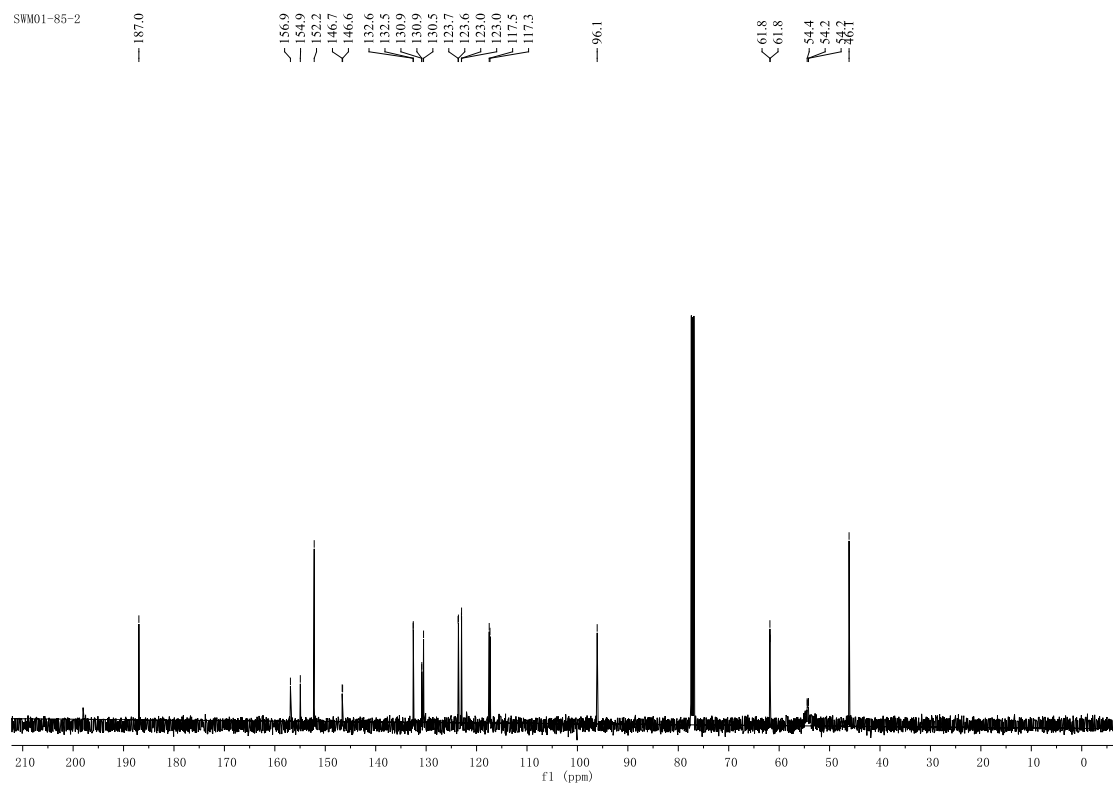

# Supplementary Information

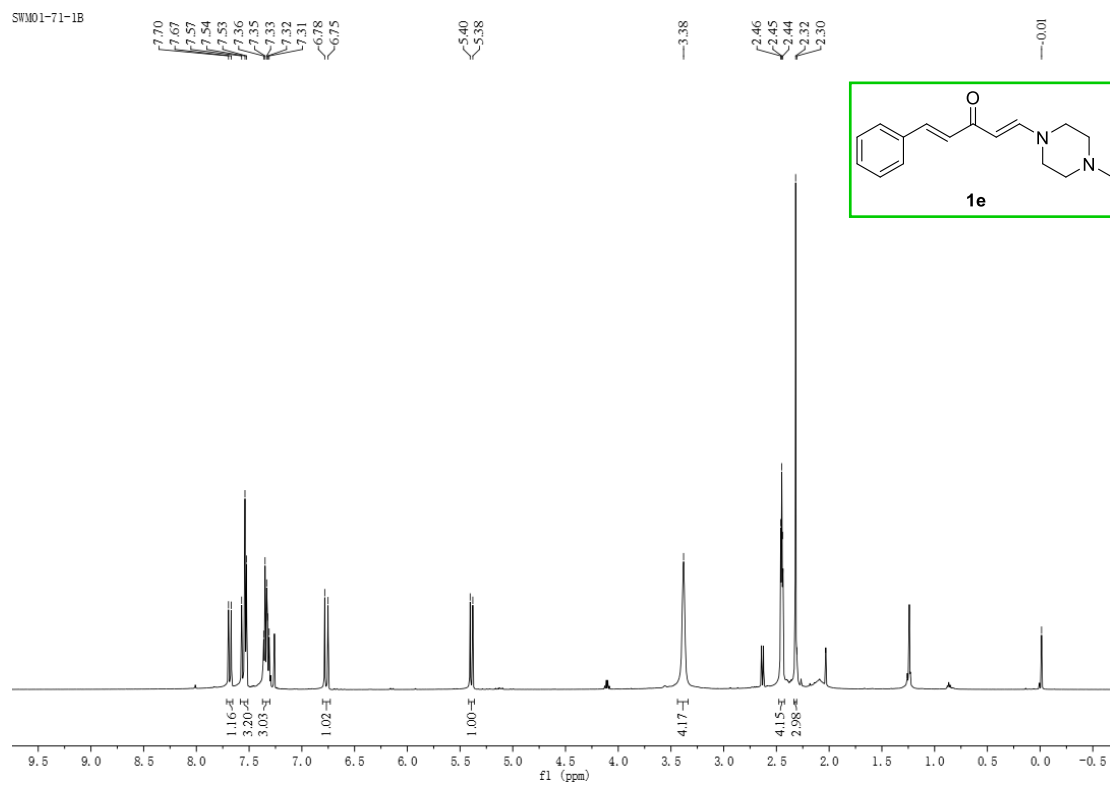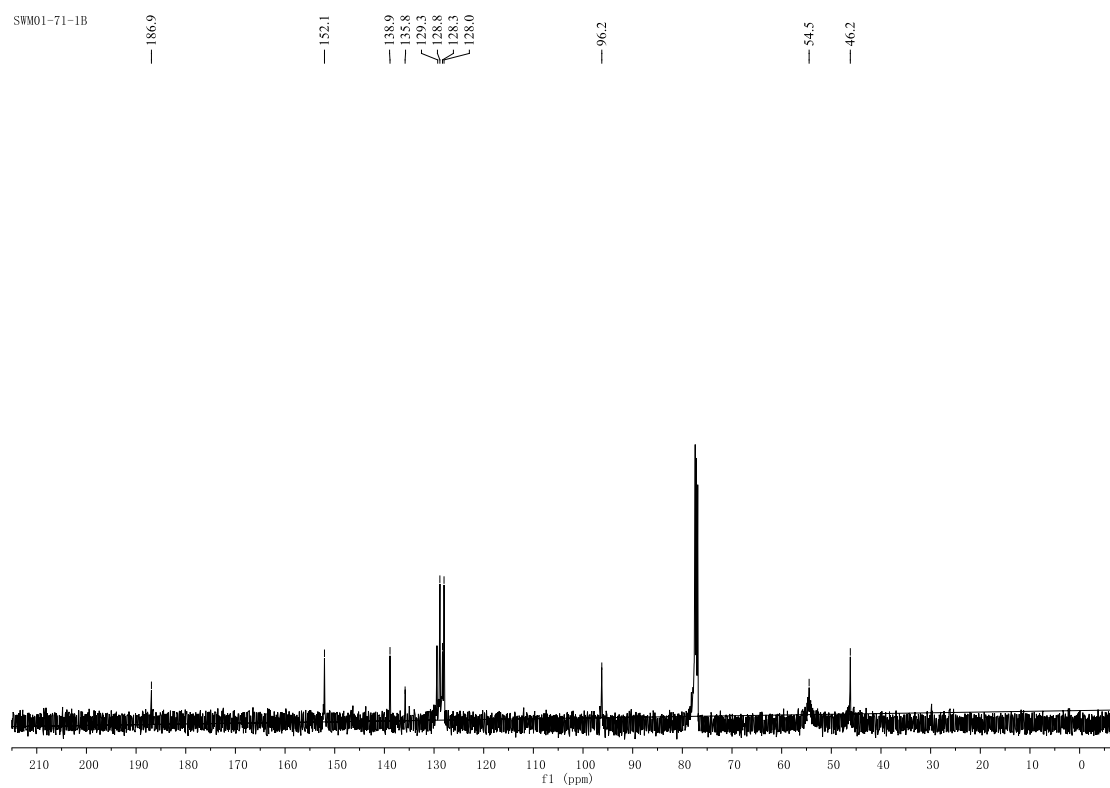

# Supplementary Information

SWM01-74-2

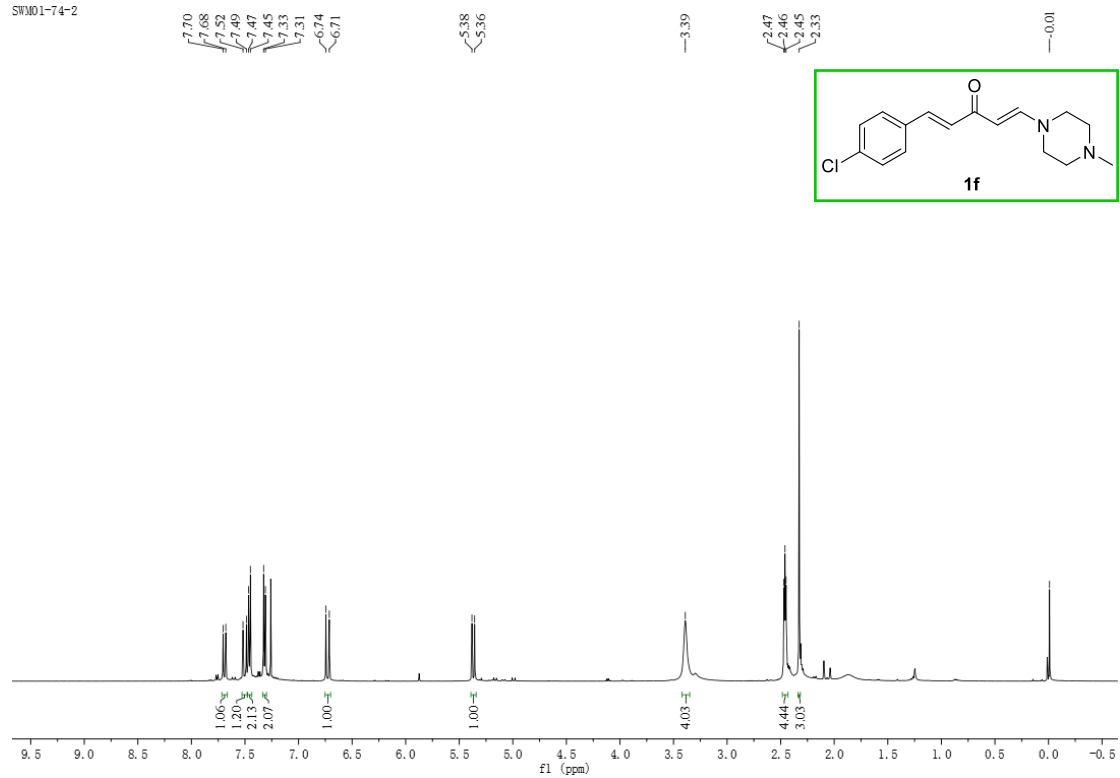

SWM01-74-2

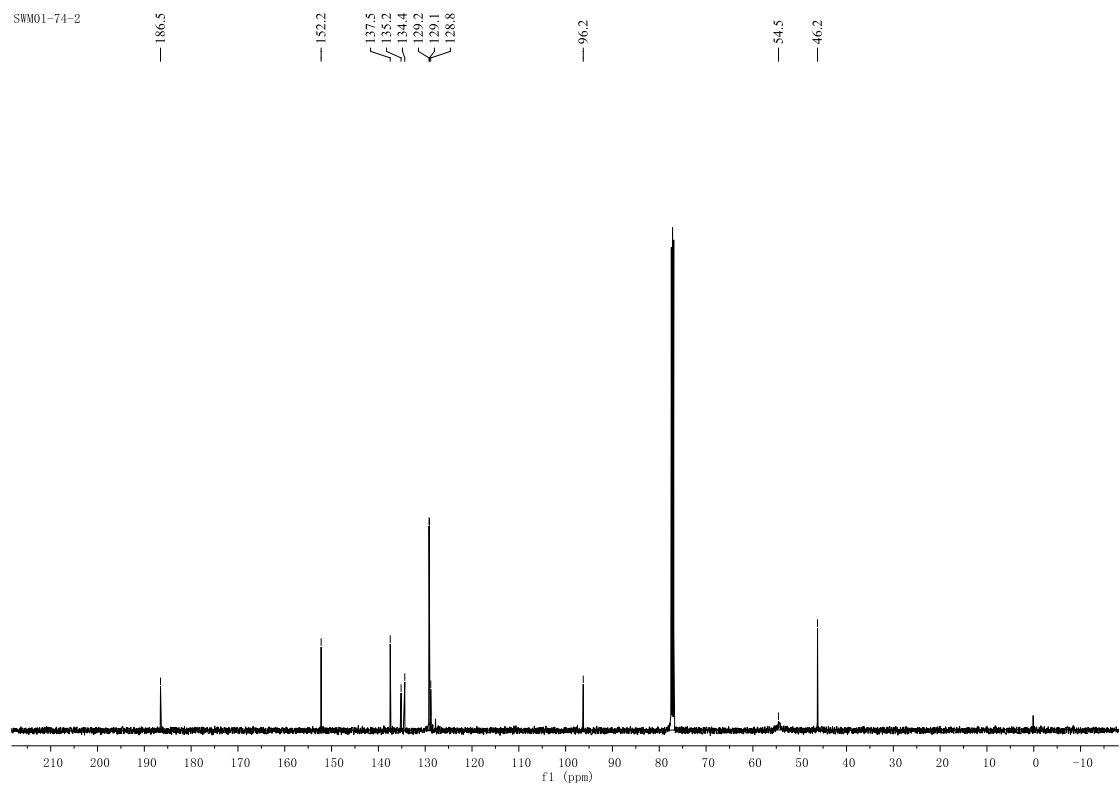

# Supplementary Information

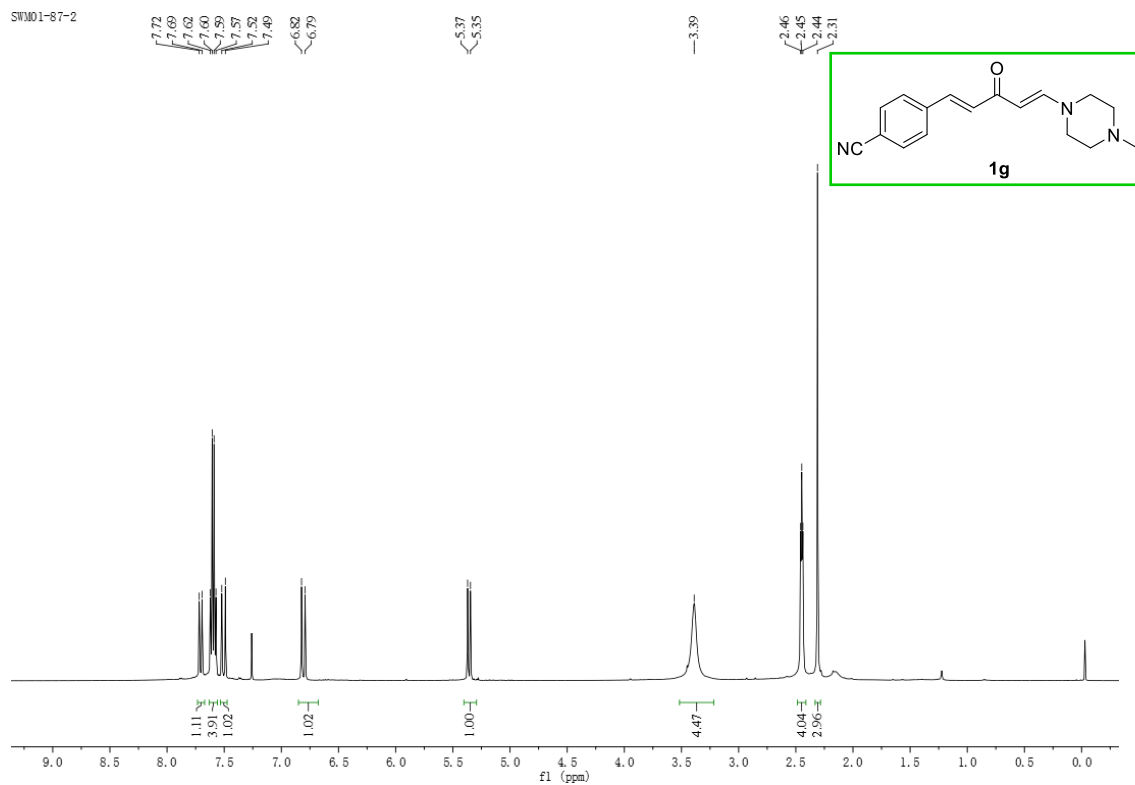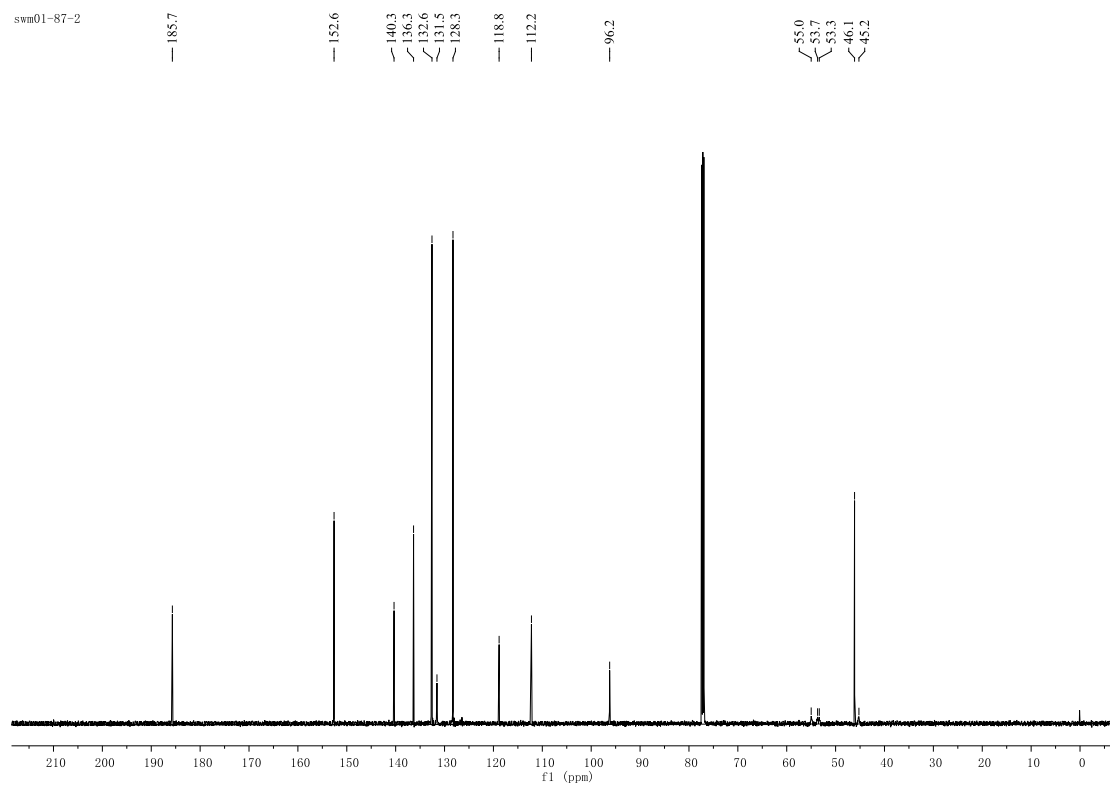

# Supplementary Information

Swm01-55

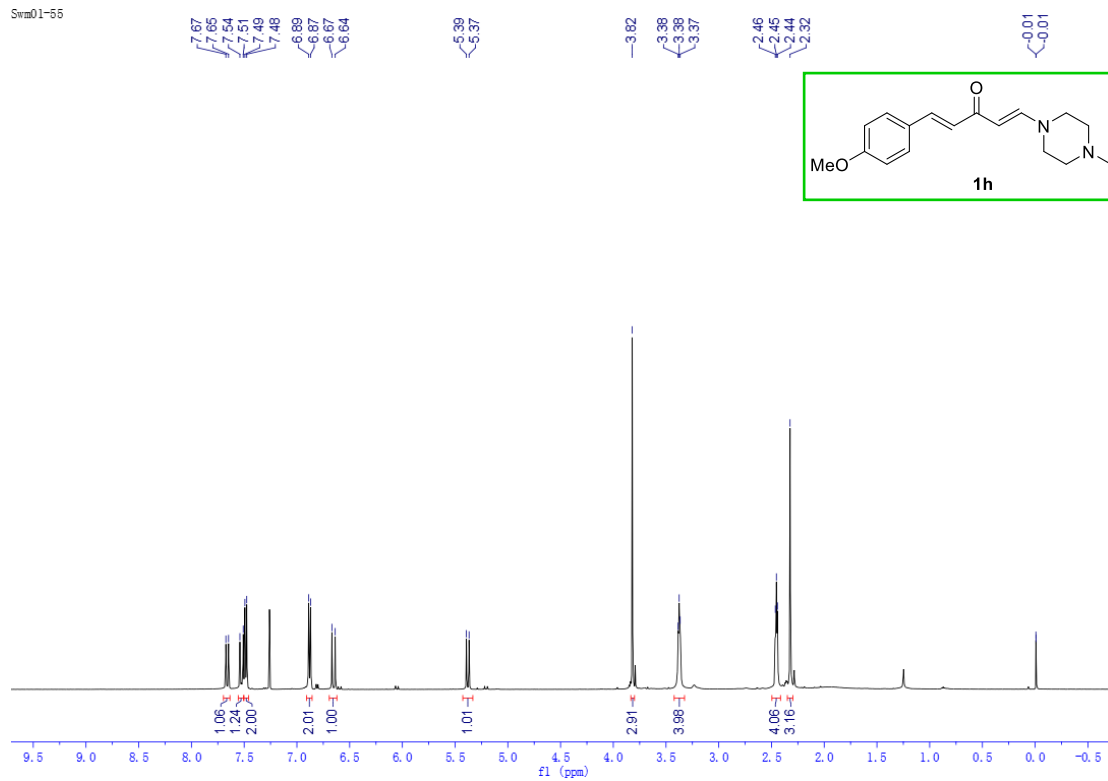

Swm01-55

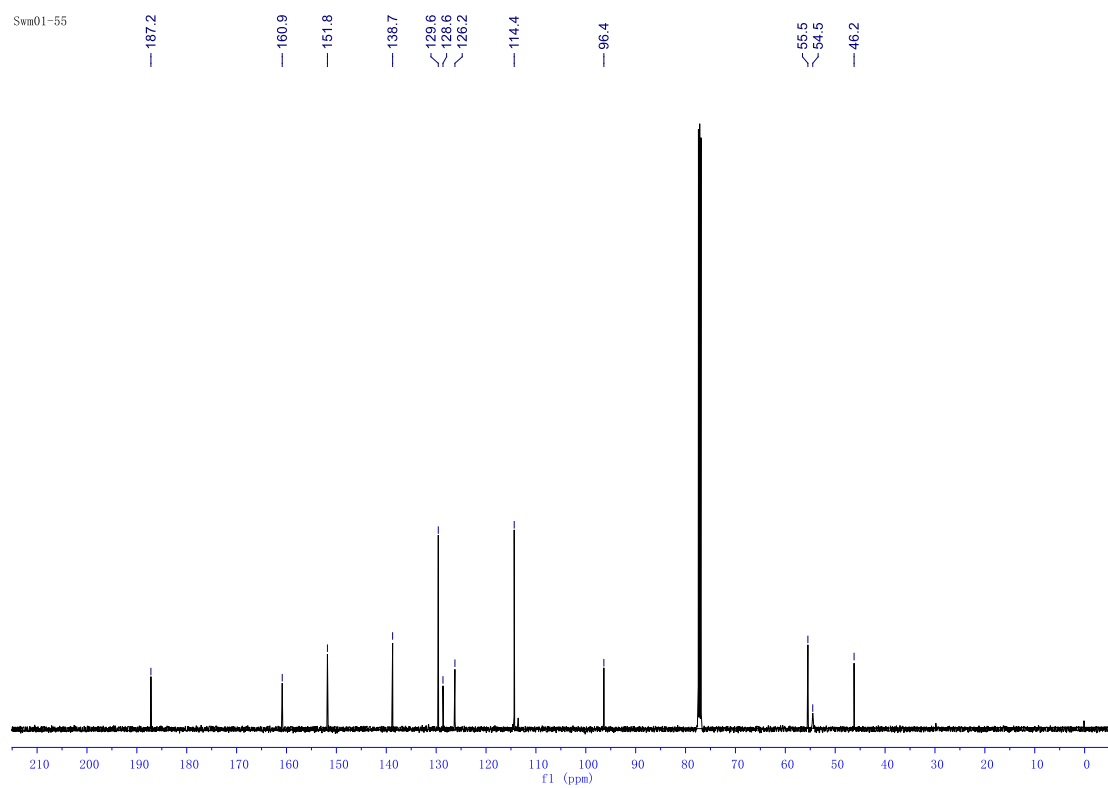

# Supplementary Information

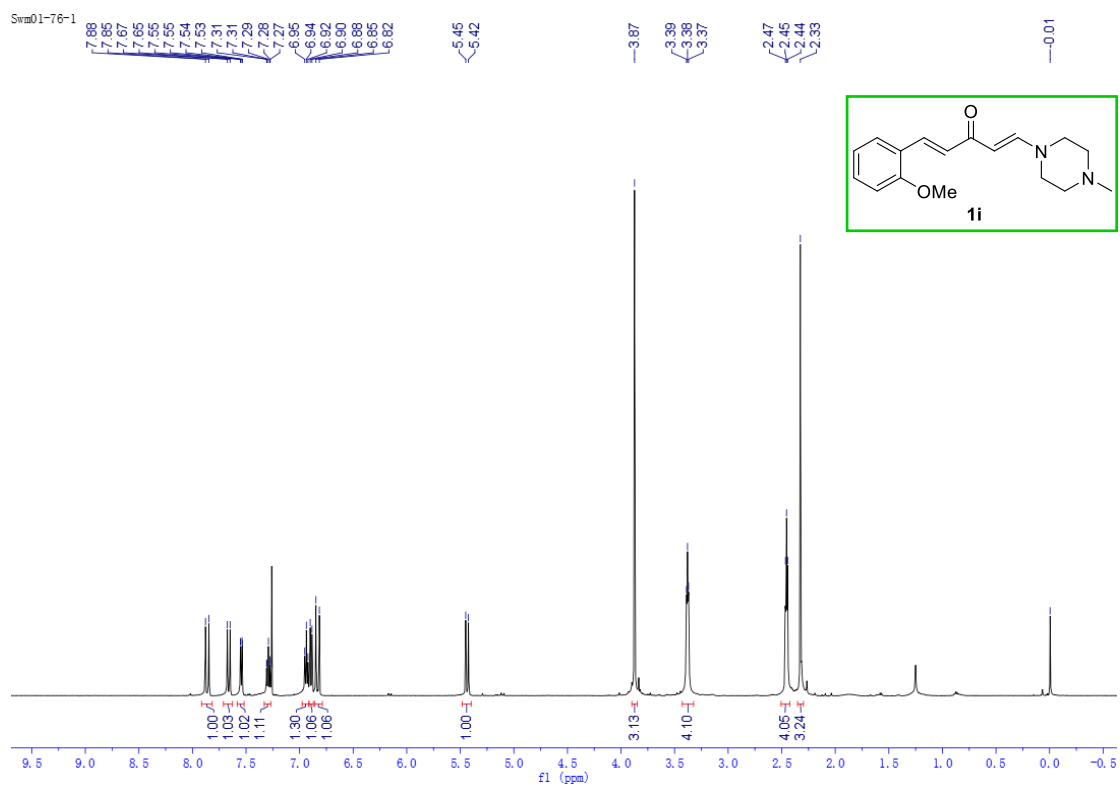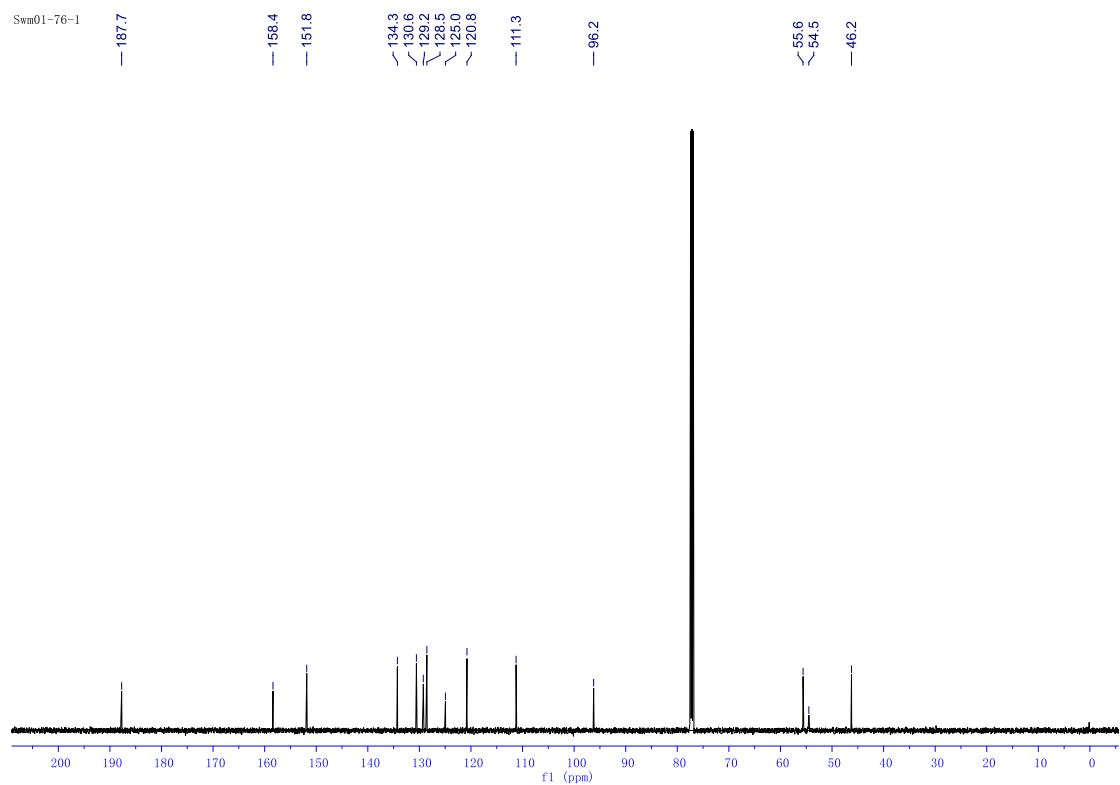

# Supplementary Information

SWH01-84-2

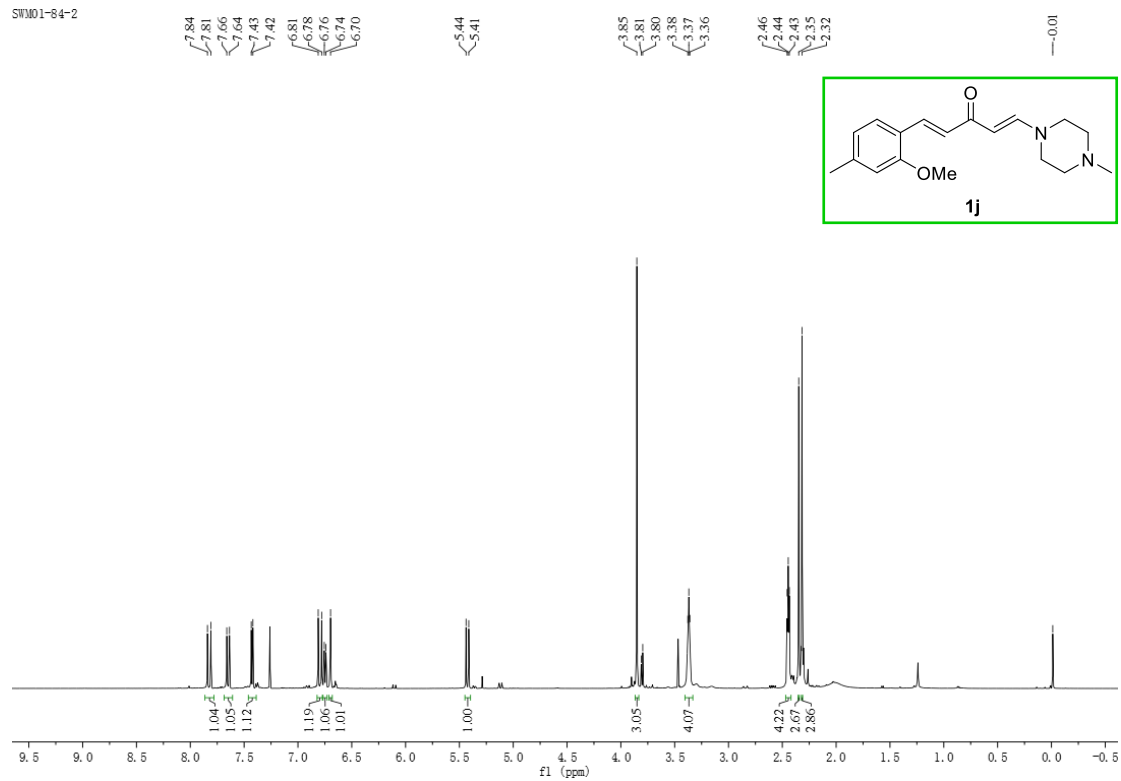

SWH01-84-2

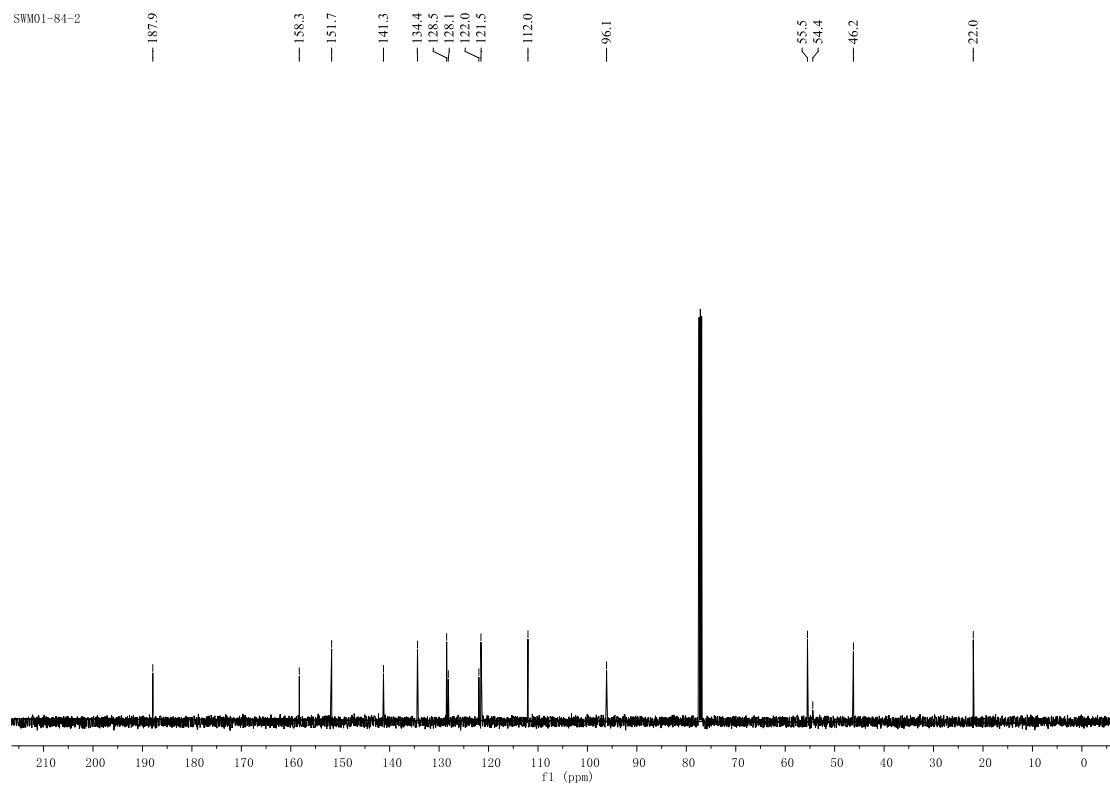

# Supplementary Information

SWM01-85-1

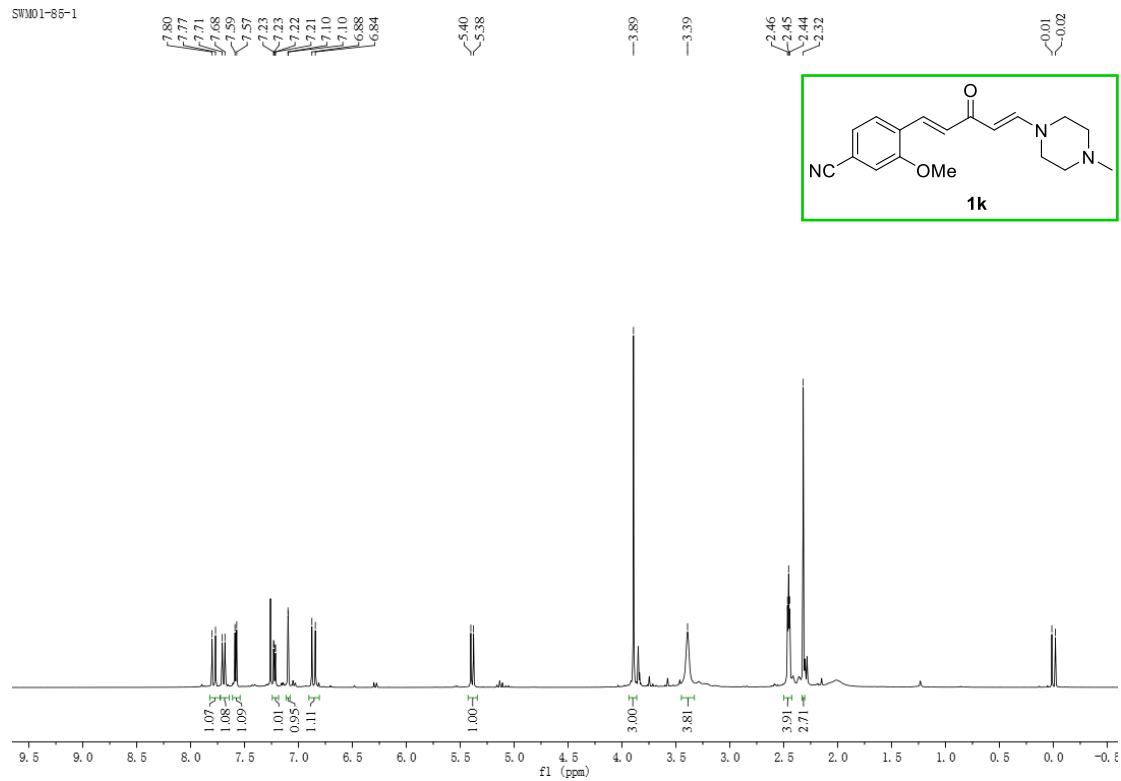

SWM01-85-1

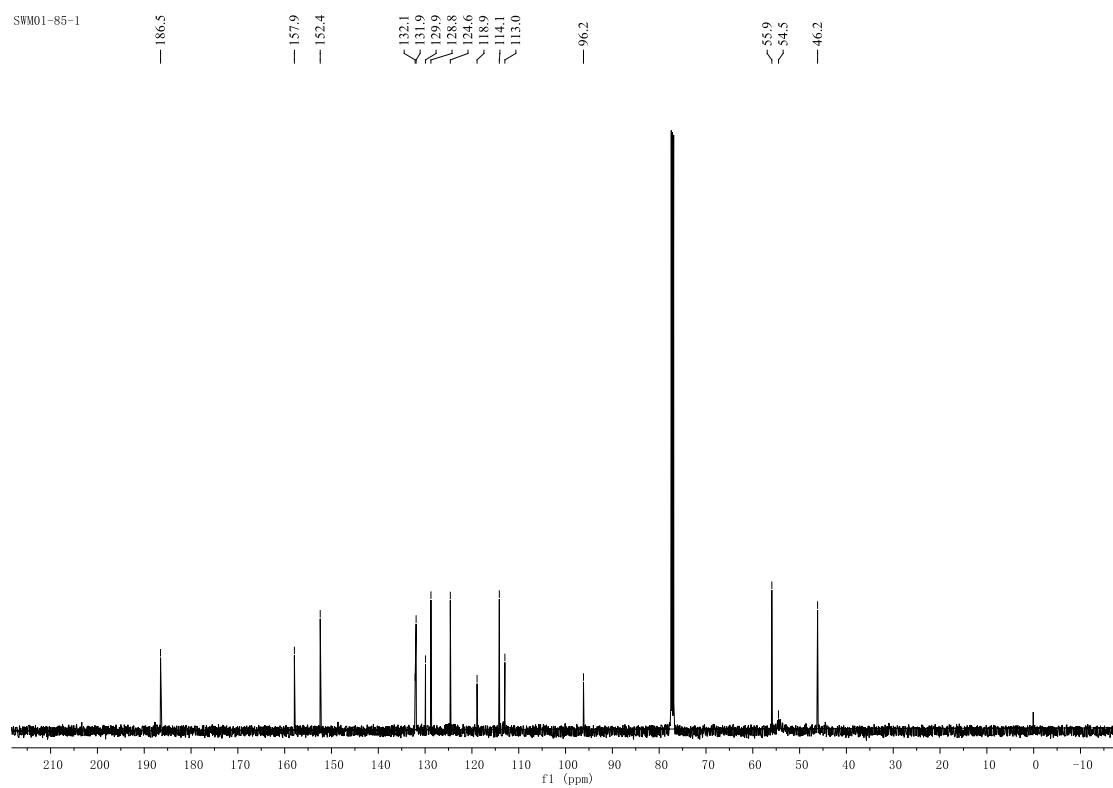



# Supplementary Information

SWM01-304-1

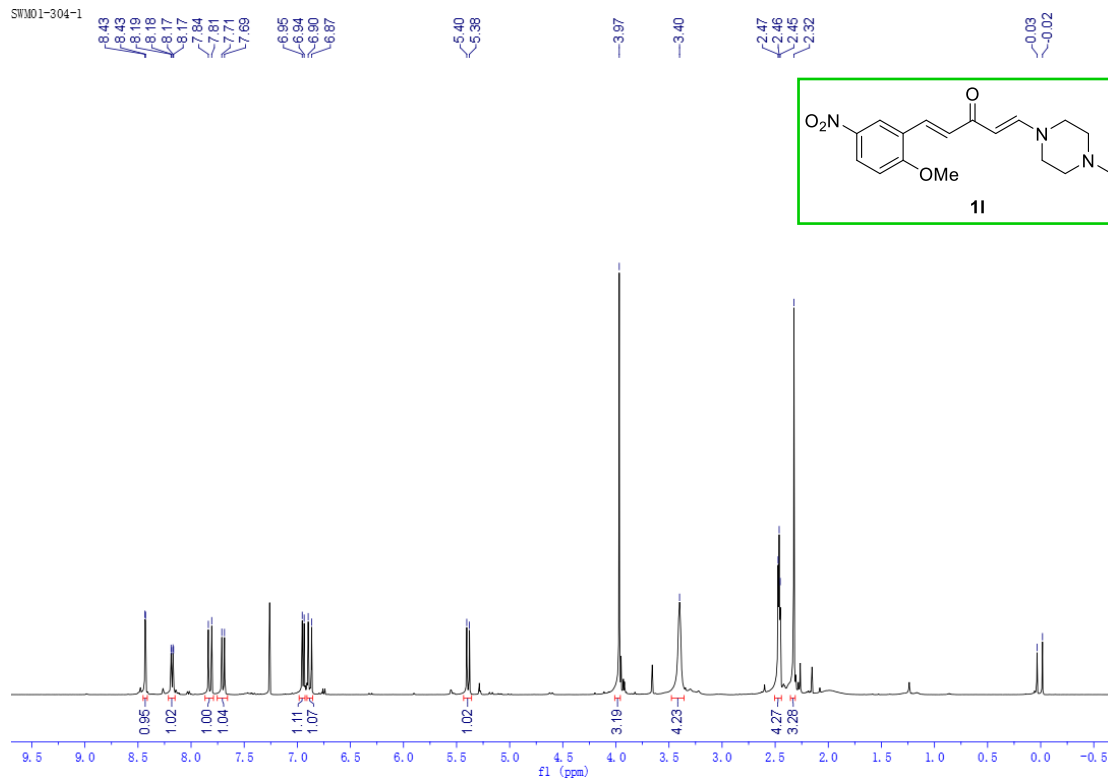

SWM01-304-1

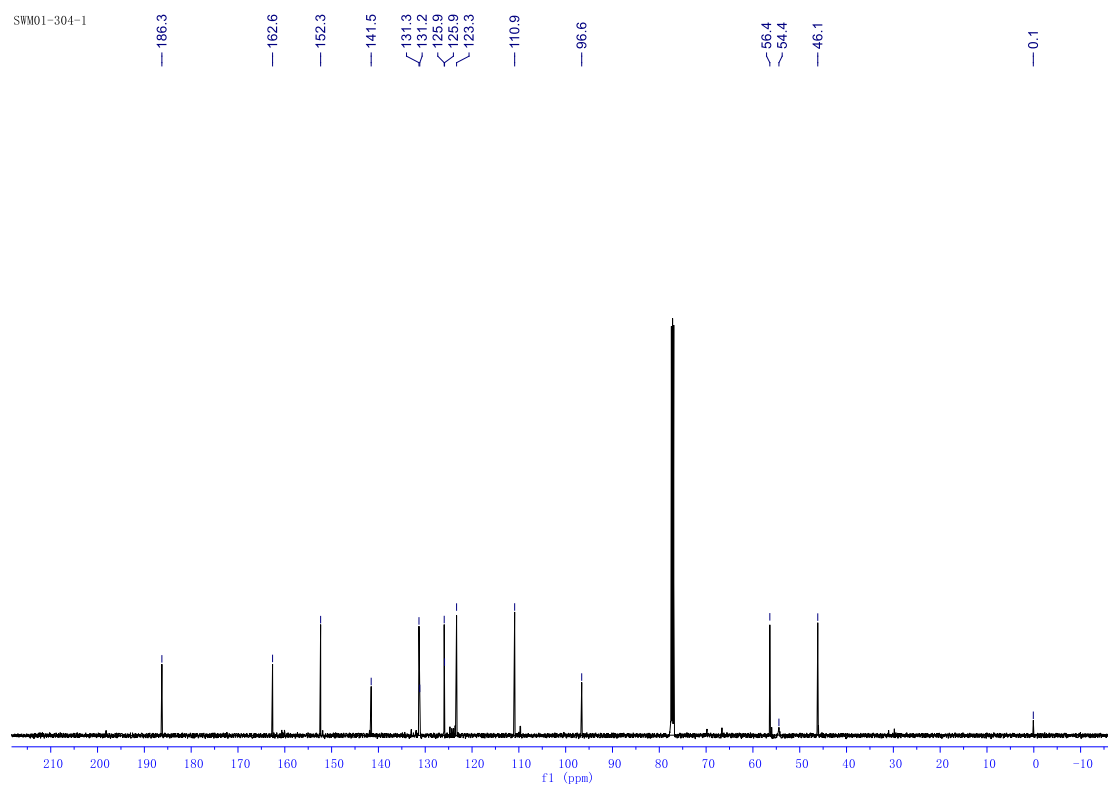

# Supplementary Information

SWM01-304-2

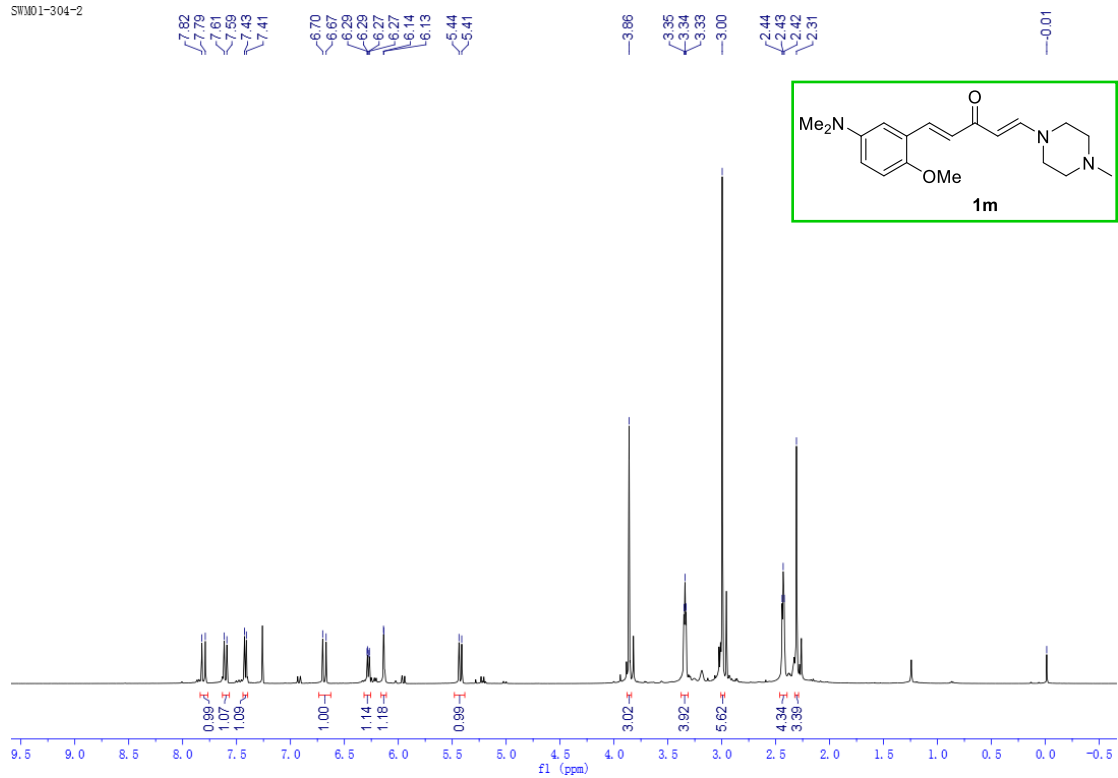

SWM01-304-2

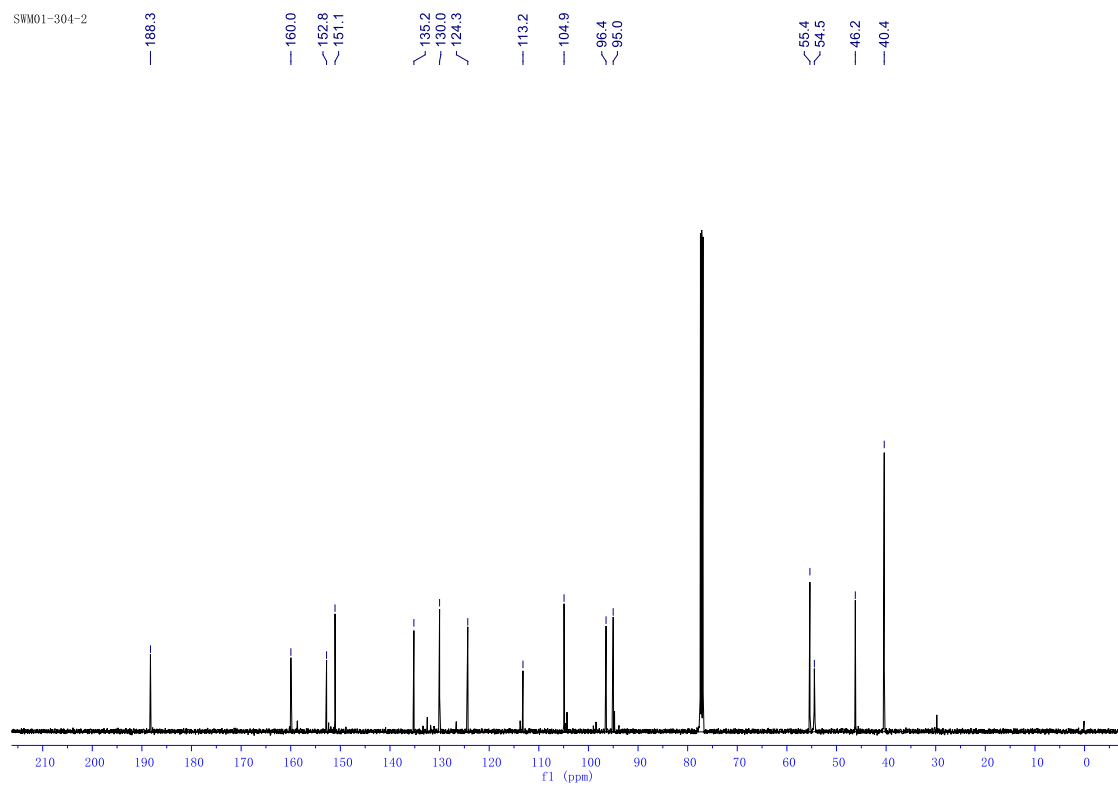

# Supplementary Information

SWM01-84-1

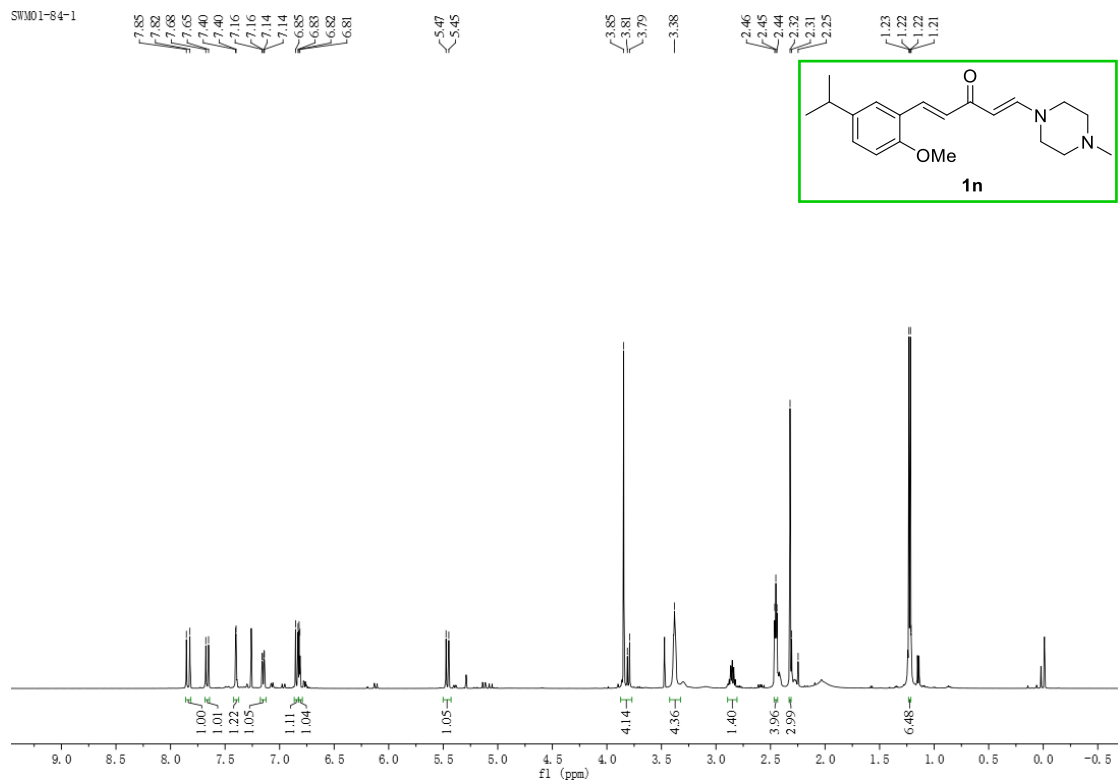

SWM01-84-1

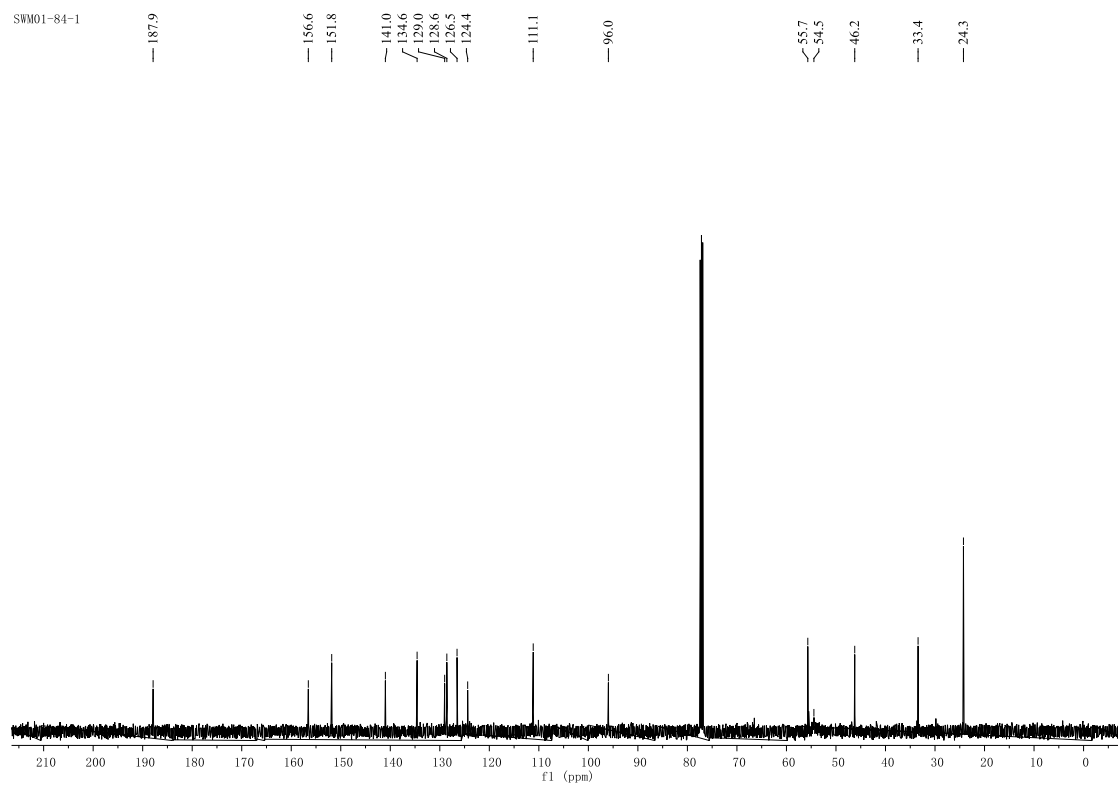

# Supplementary Information

SWM01-86-1

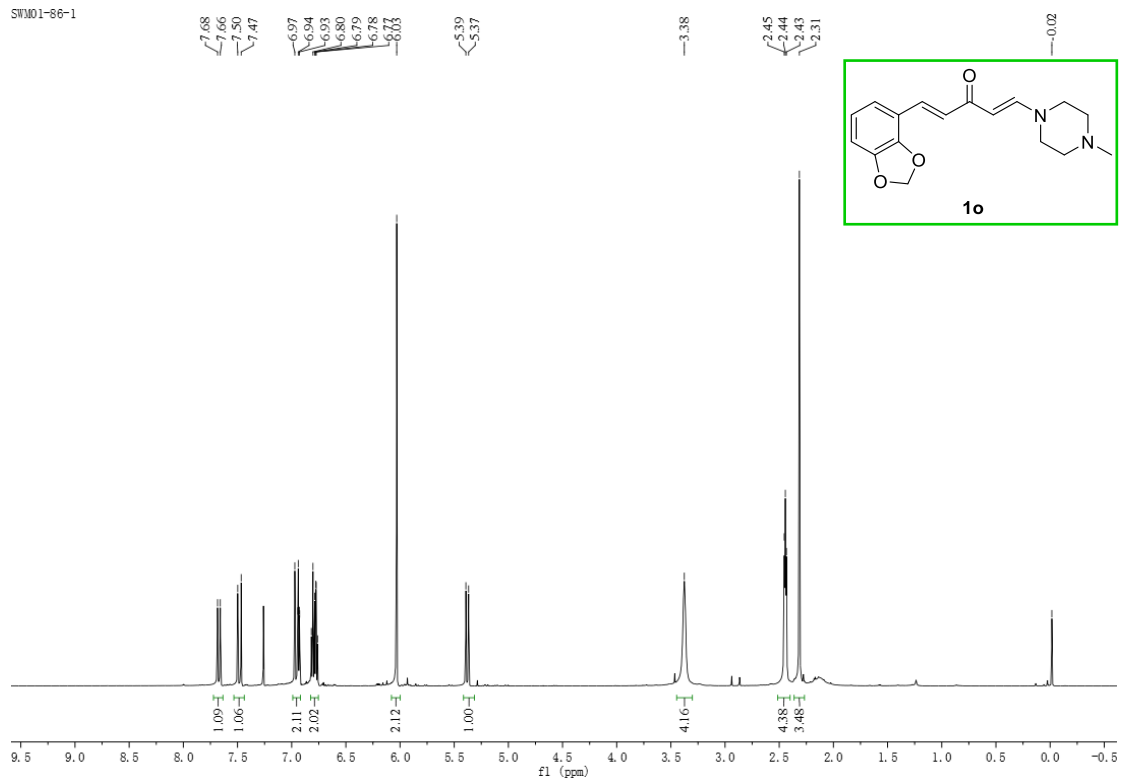

SWM01-86-1

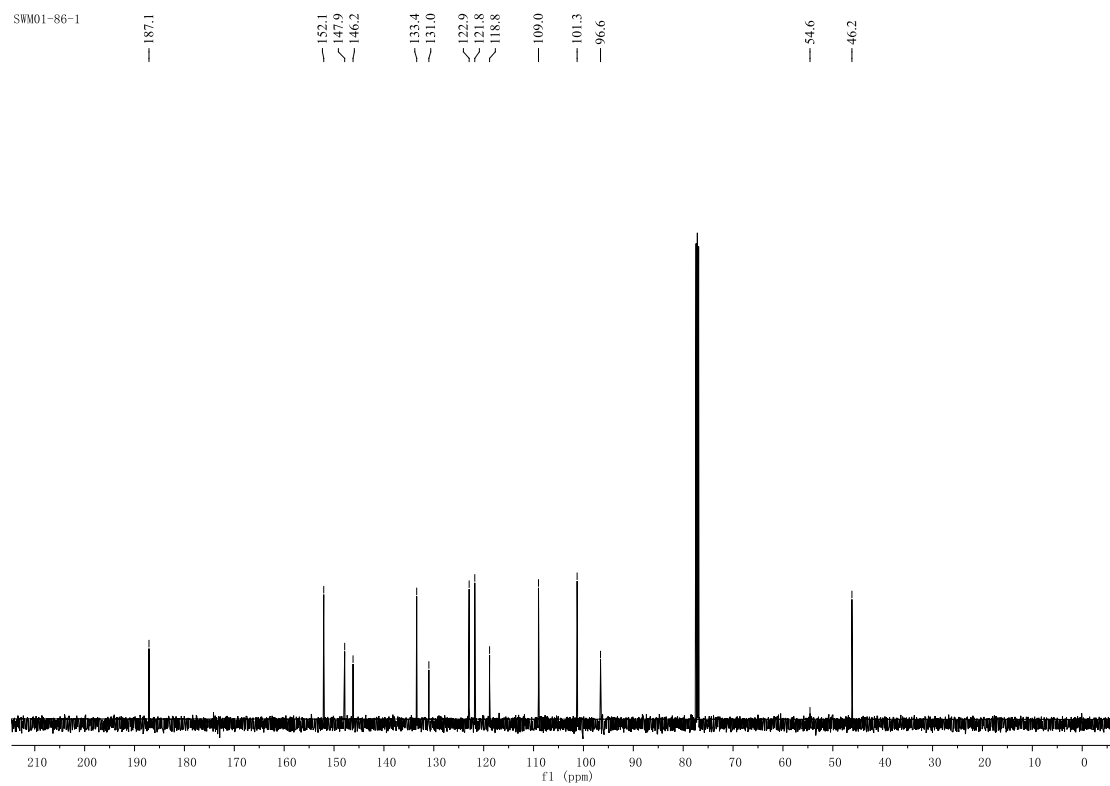

# Supplementary Information

SWM01-86-2

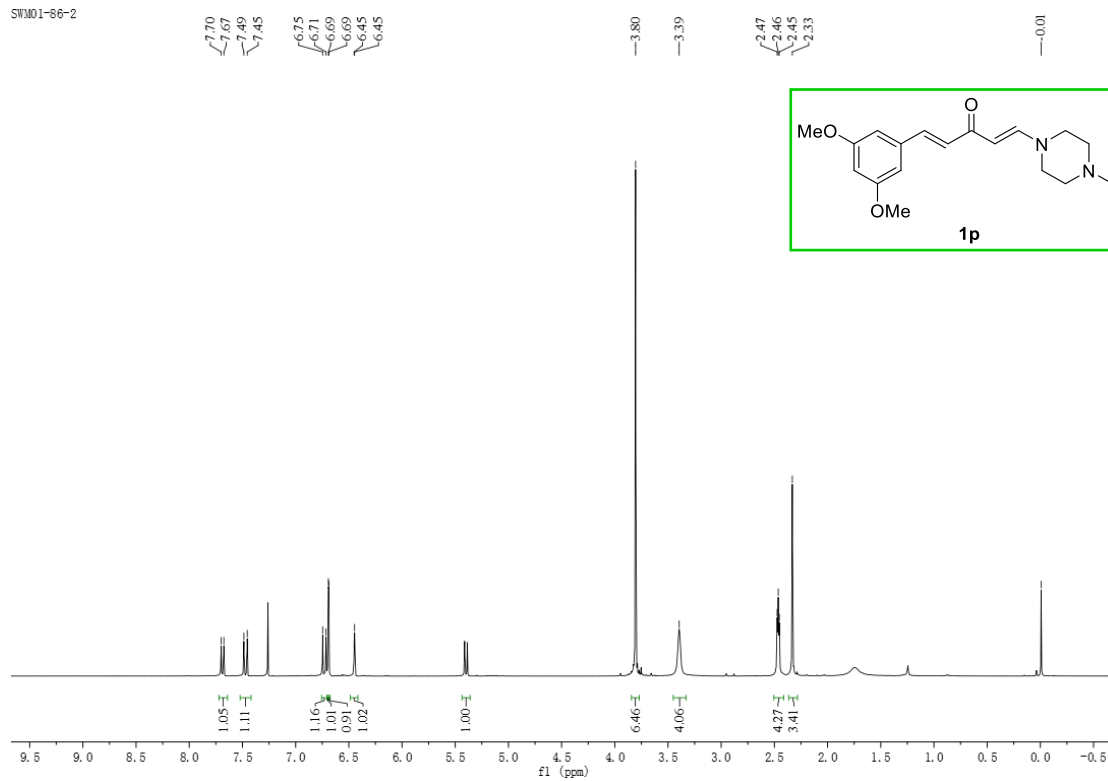

SWM01-86-2

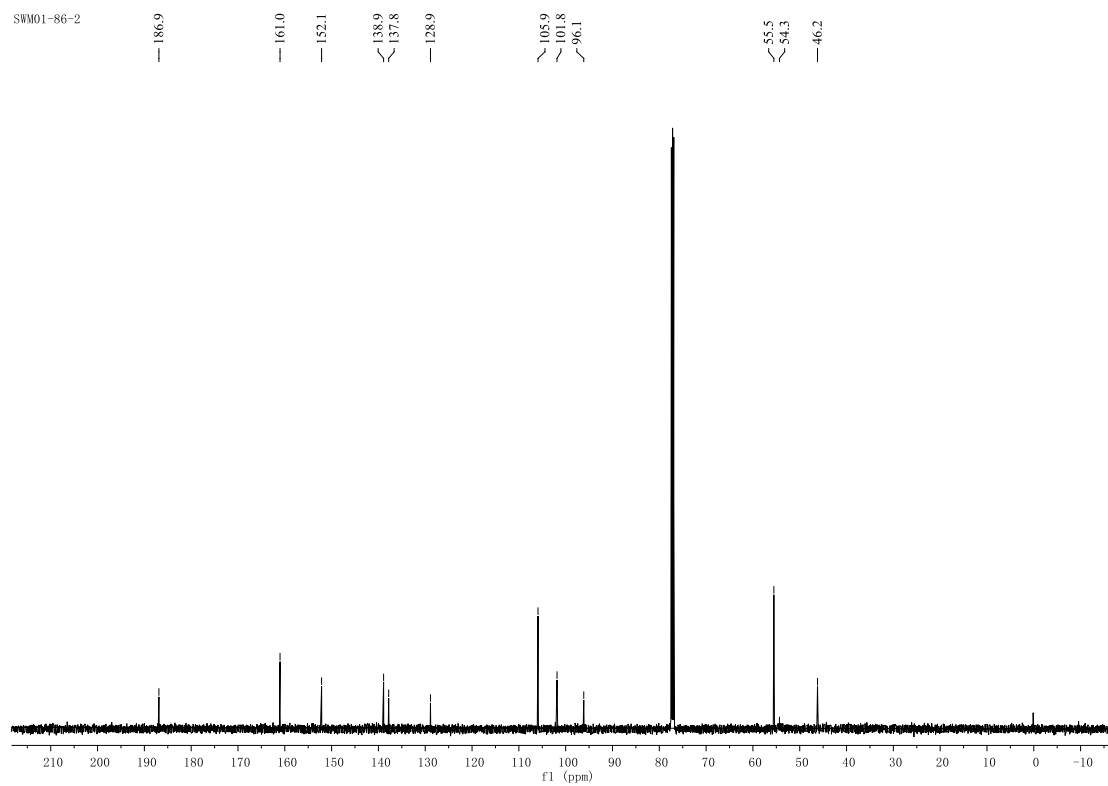

# Supplementary Information

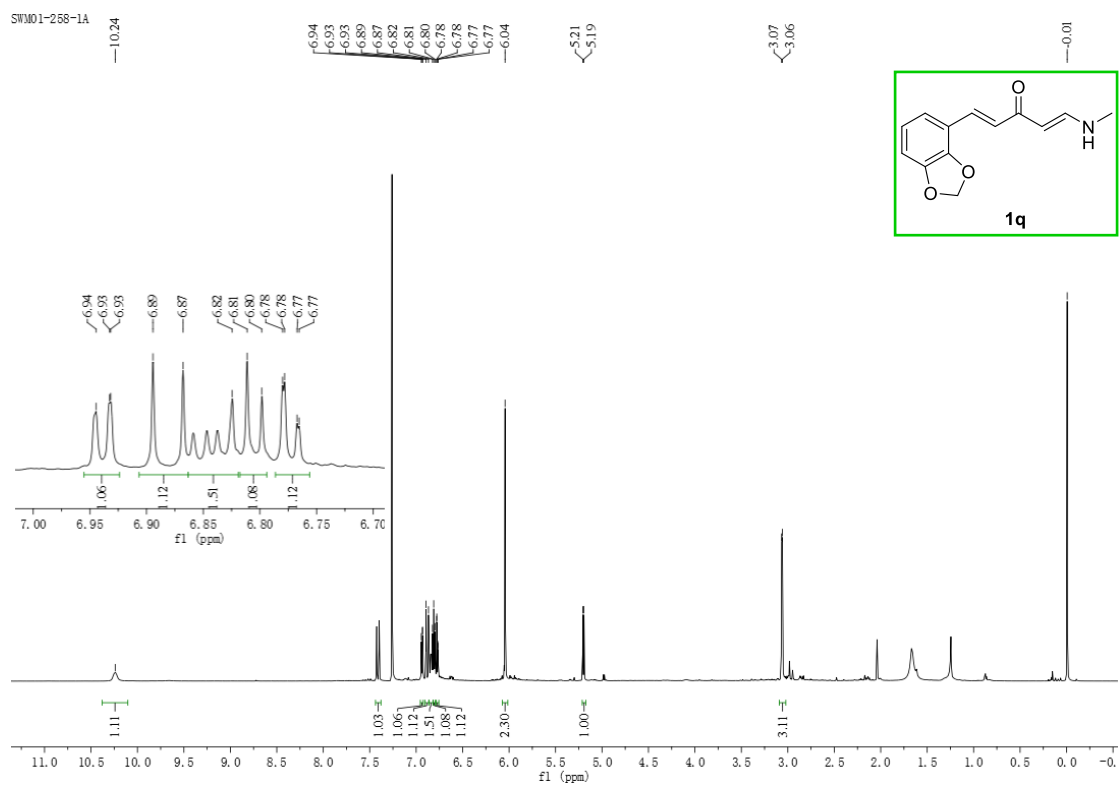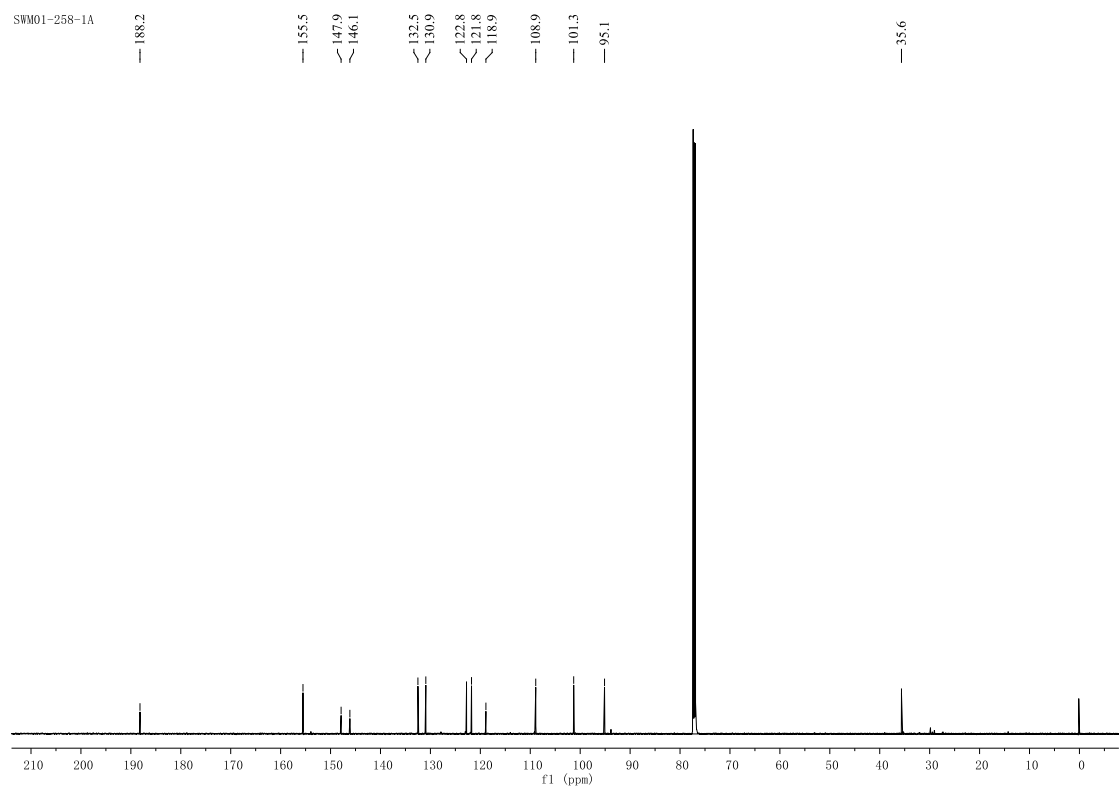

# Supplementary Information

SWM01-257-1A

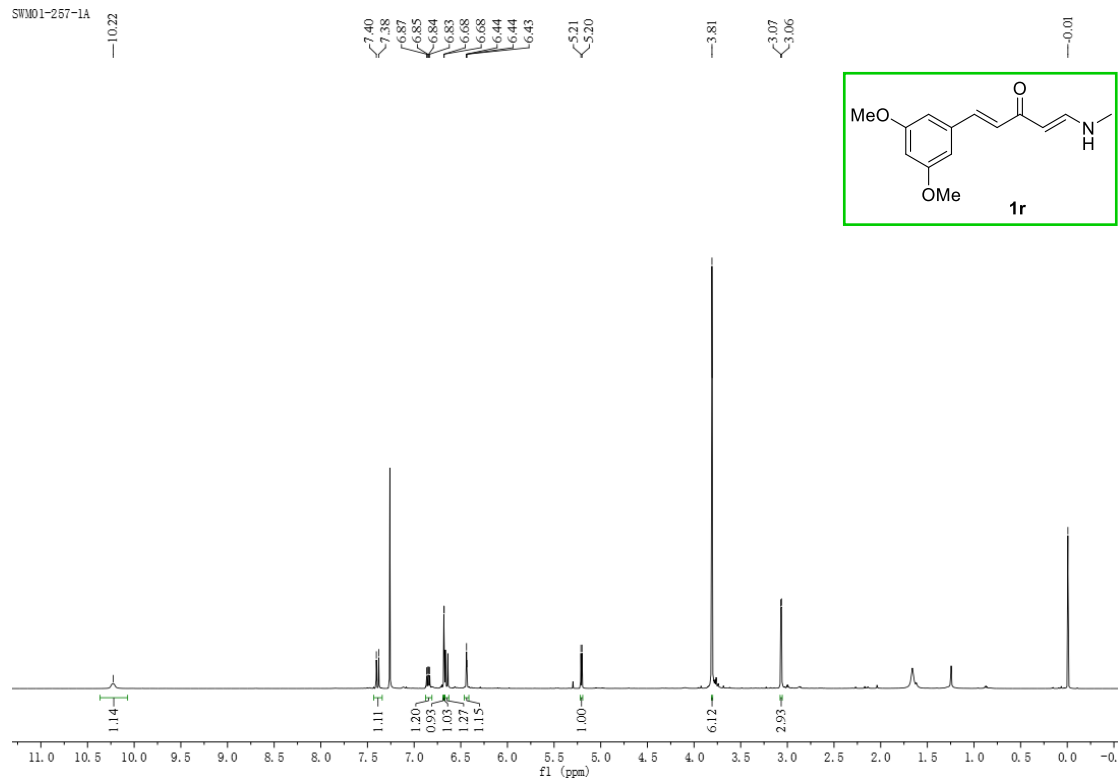

SWM01-257-1A

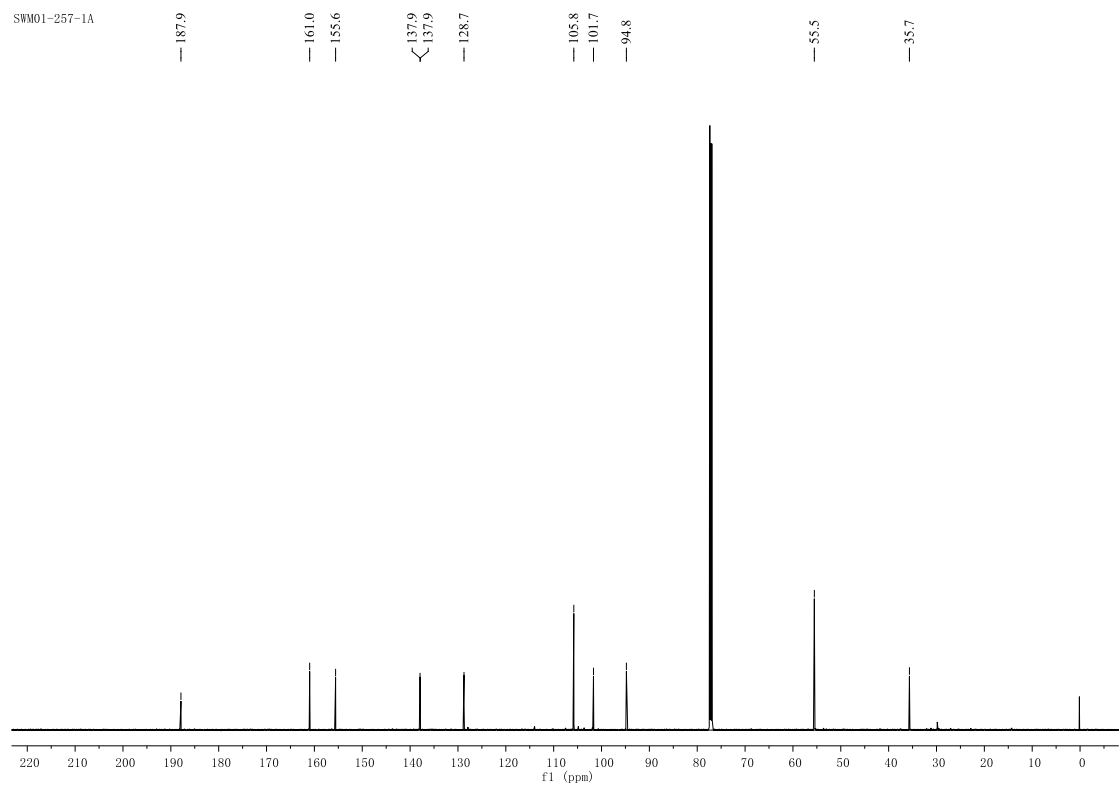

# Supplementary Information

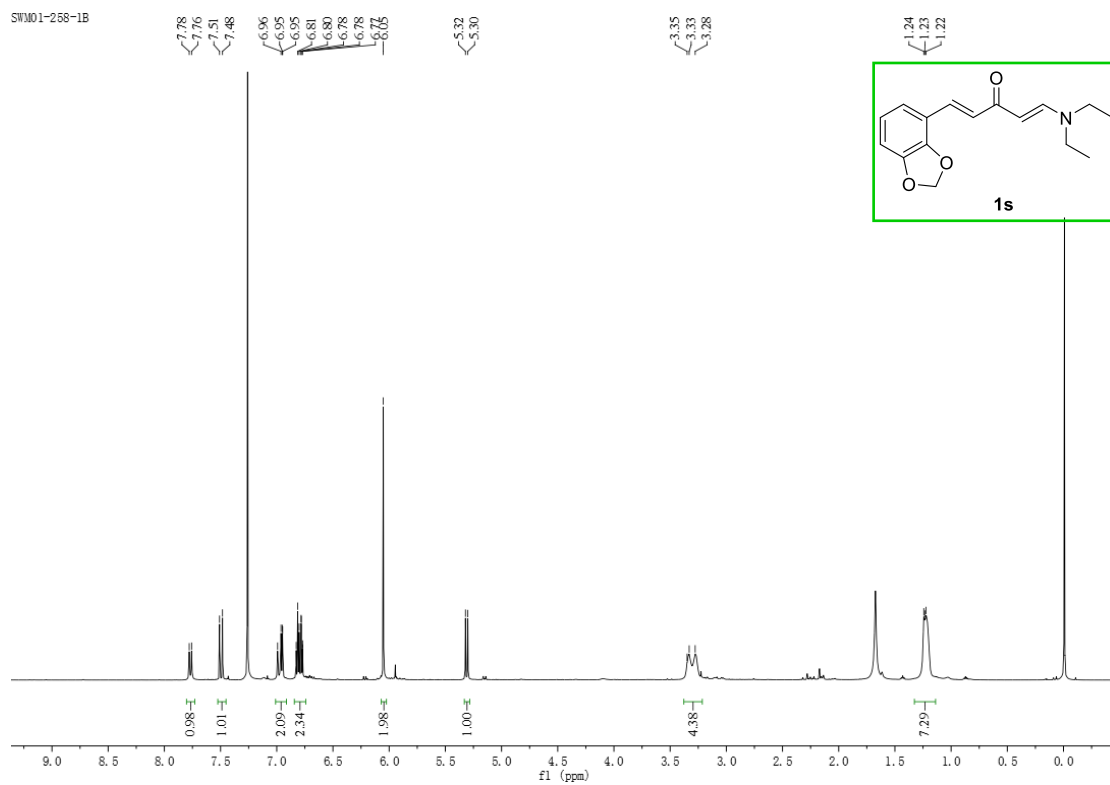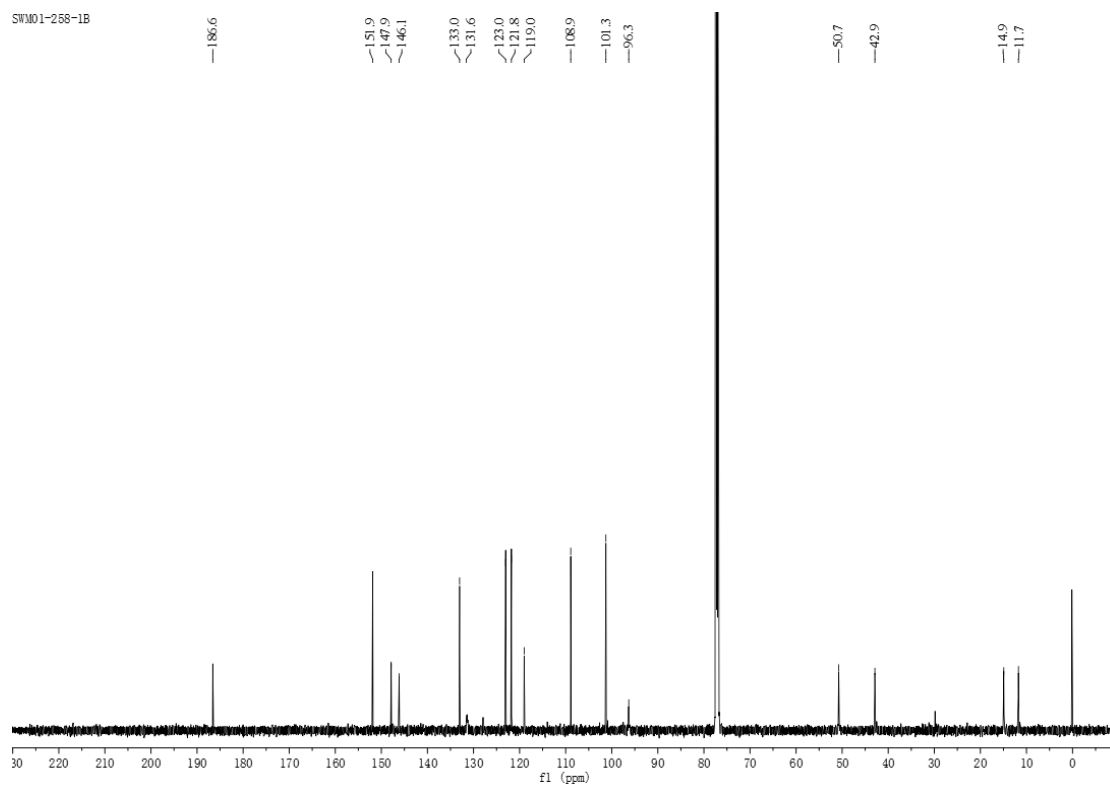



# Supplementary Information

SI-M01-257-1B

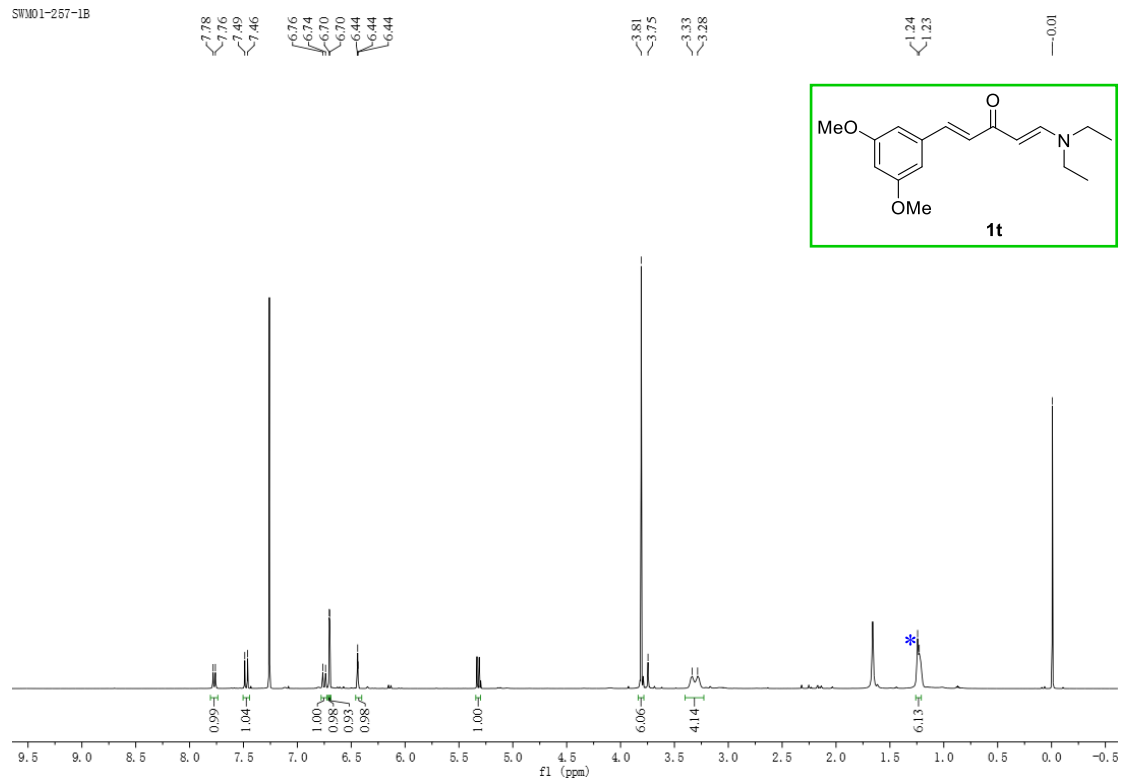

\* grease

SI-M01-257-1B

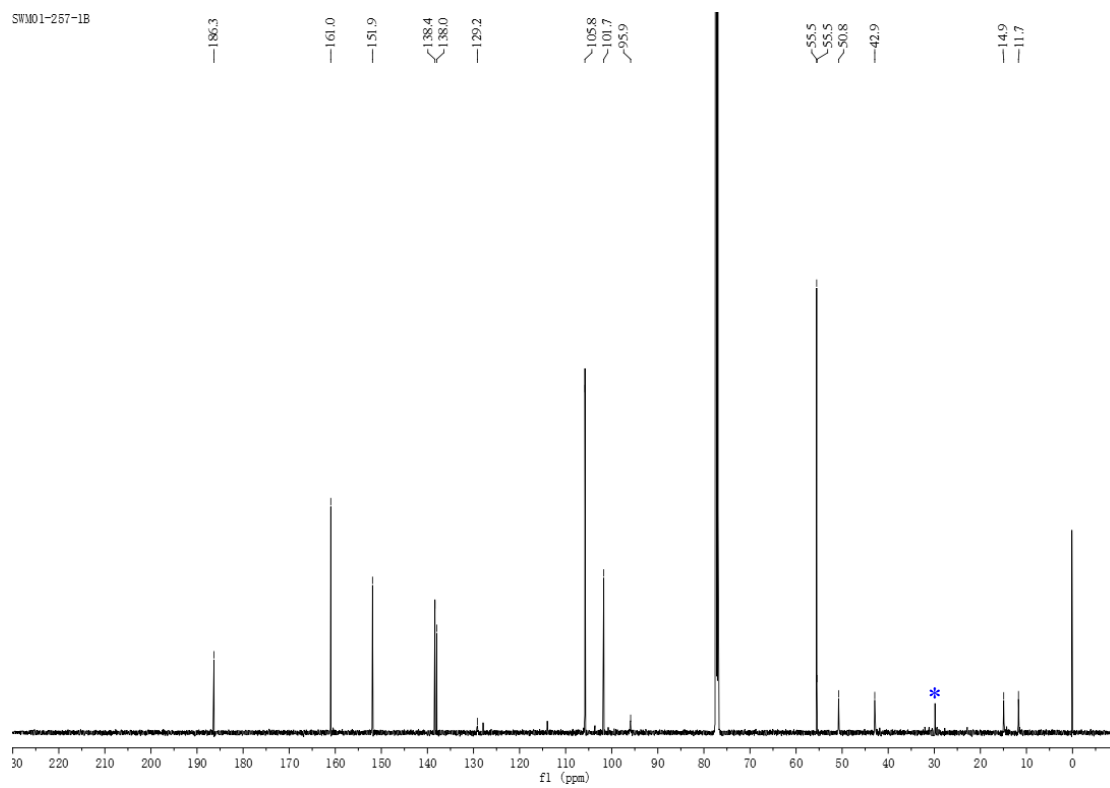

# Supplementary Information

swm01-257-2B

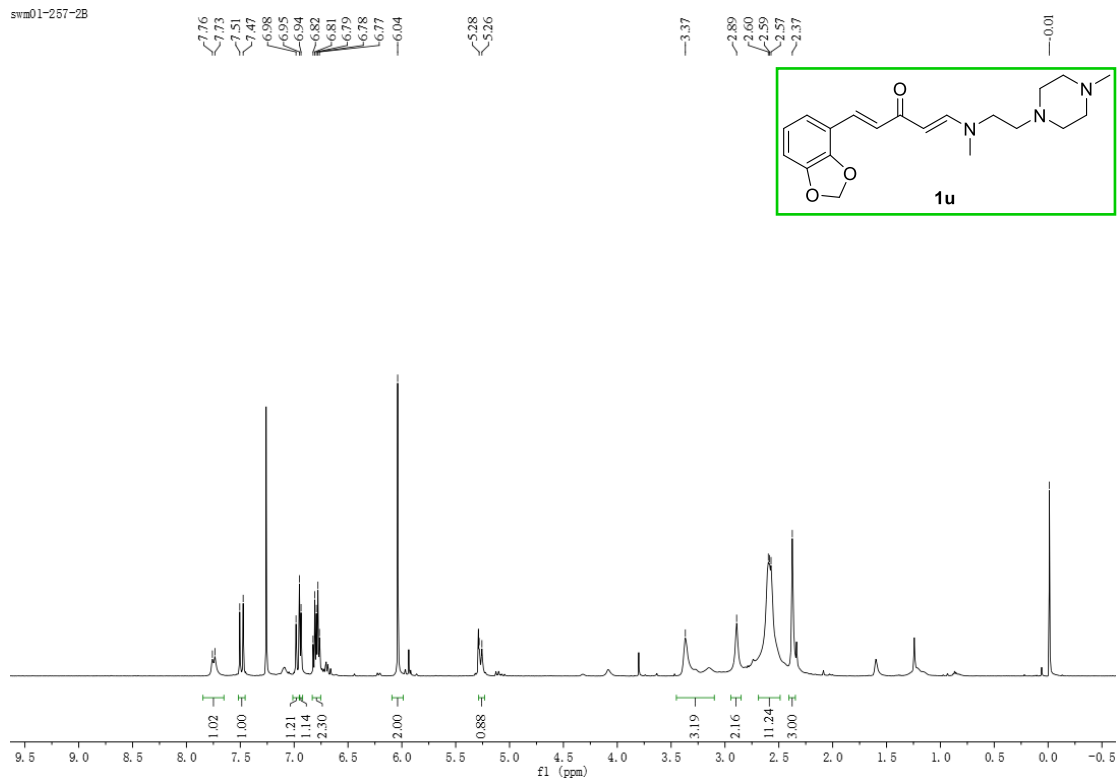

swm01-257-2B

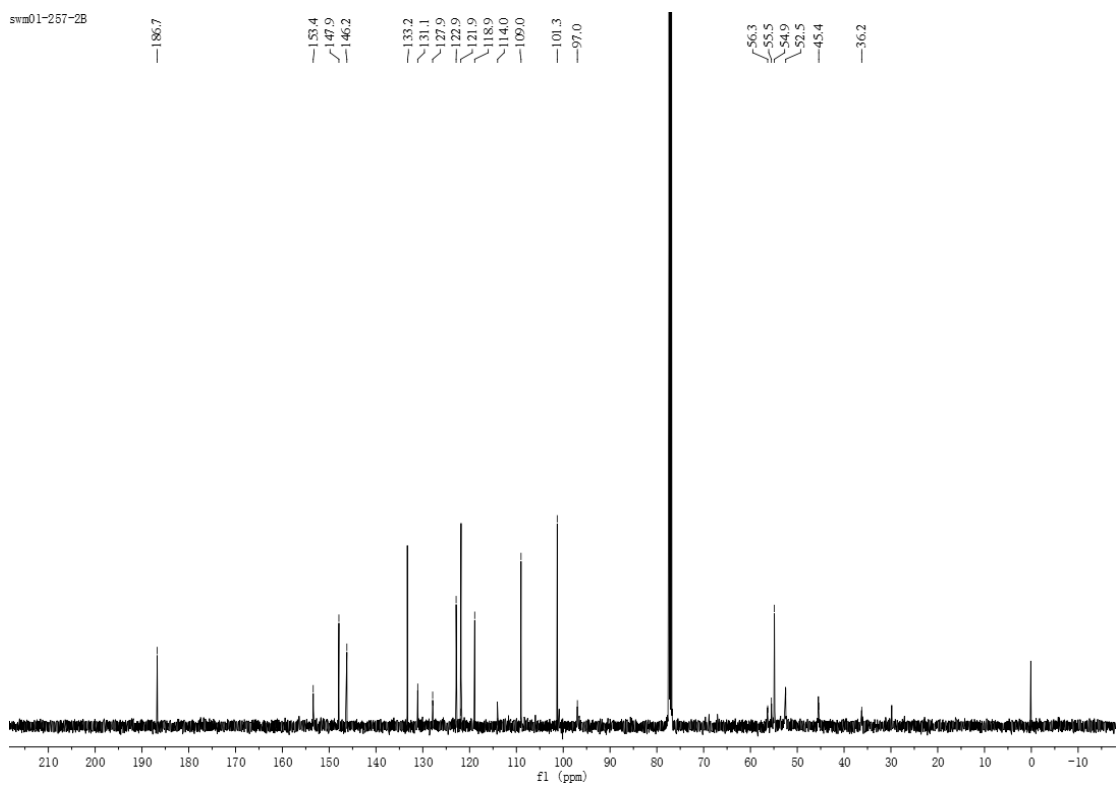

# Supplementary Information

SWM01-250-2

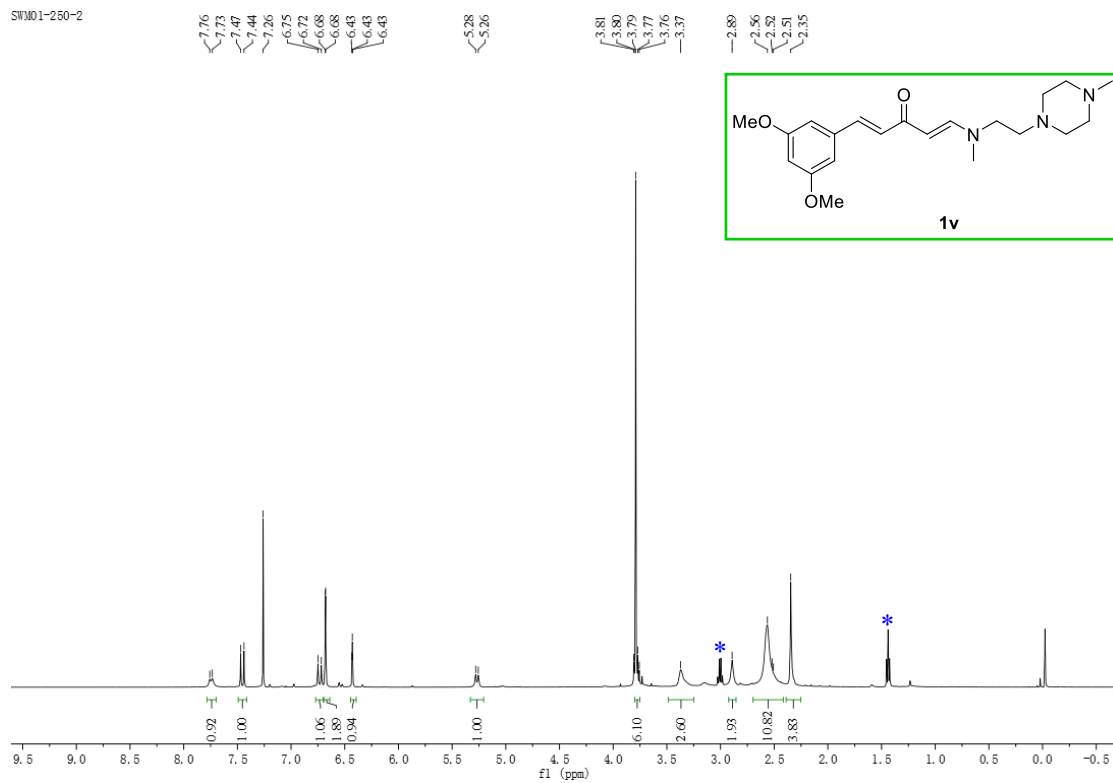

\* HNEt<sub>2</sub>

SWM01-250-2

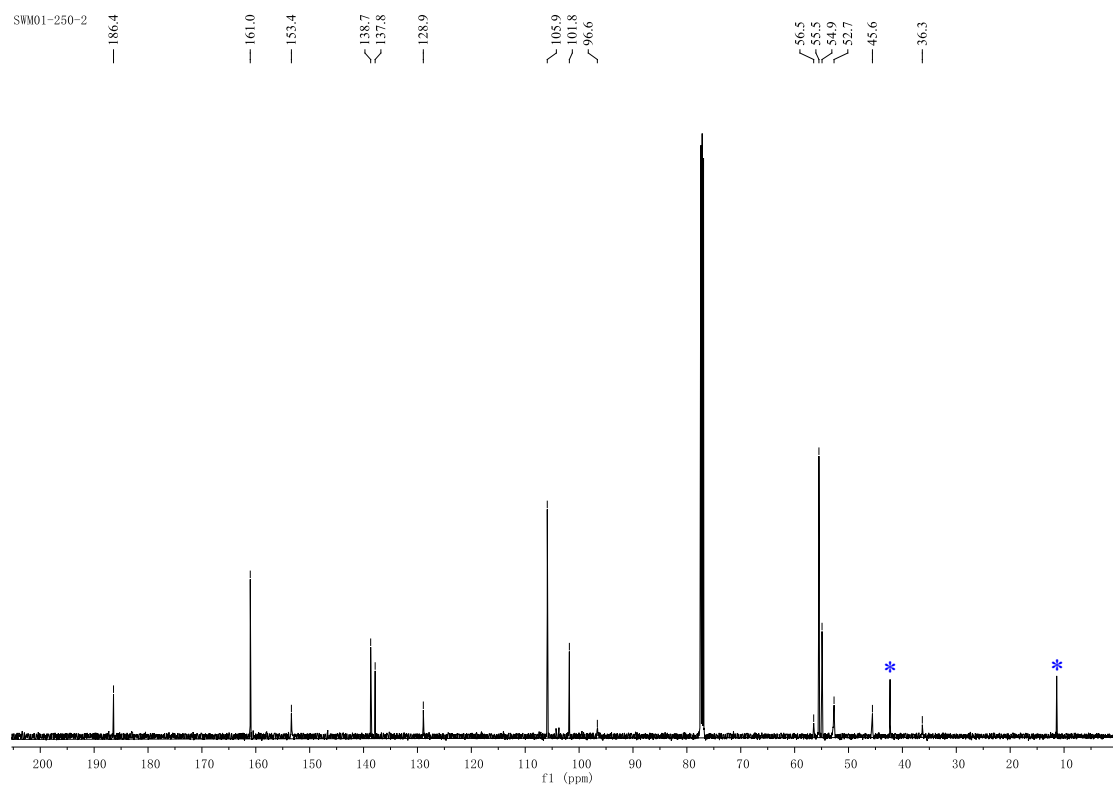

# Supplementary Information

SWM01-308-1B

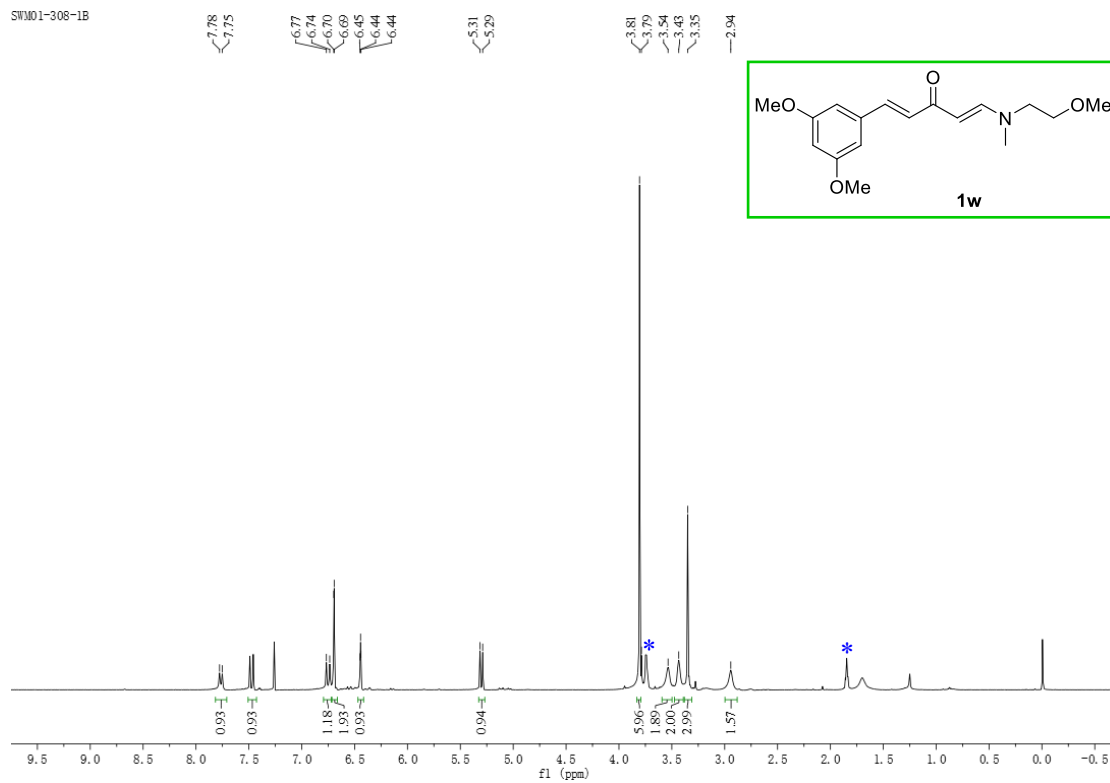

\* THF

SWM01-308-1B

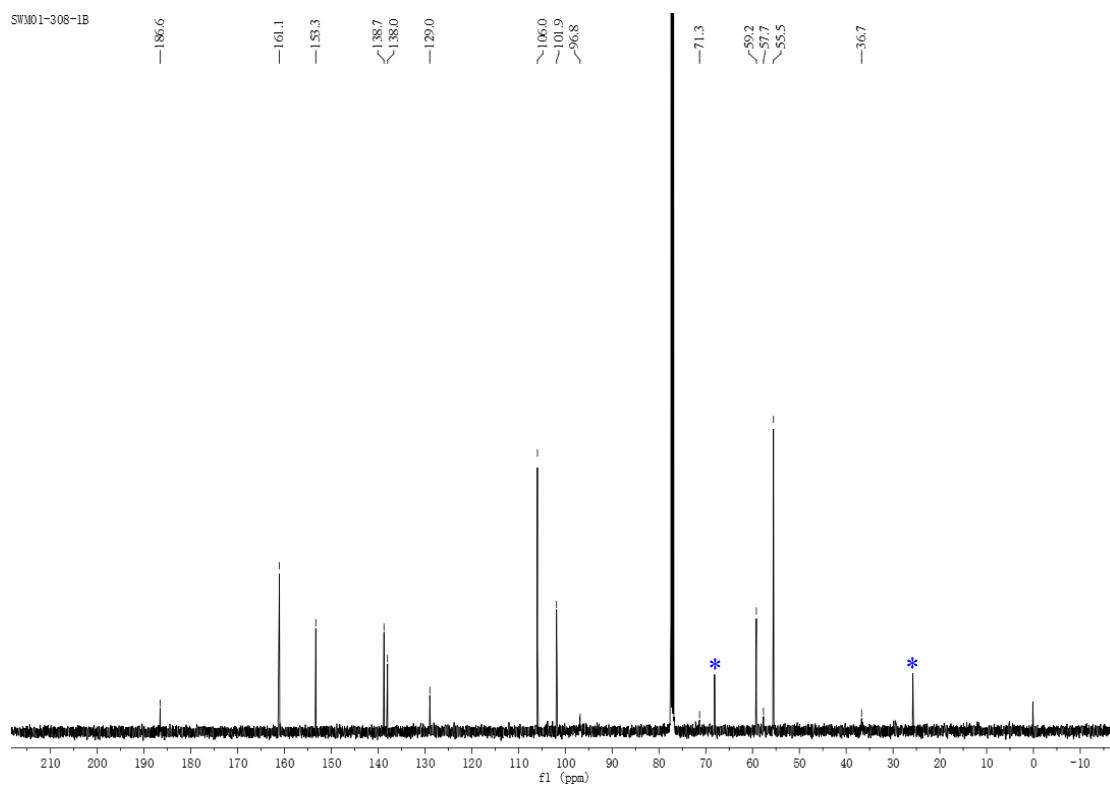

# Supplementary Information

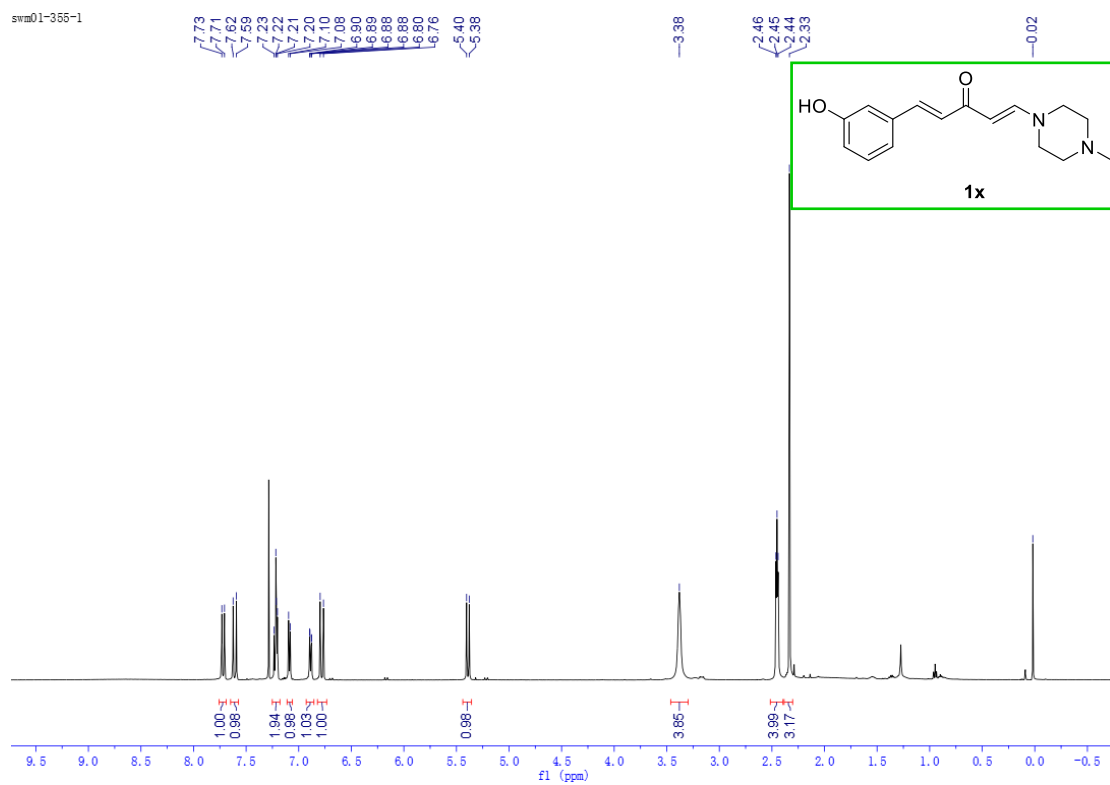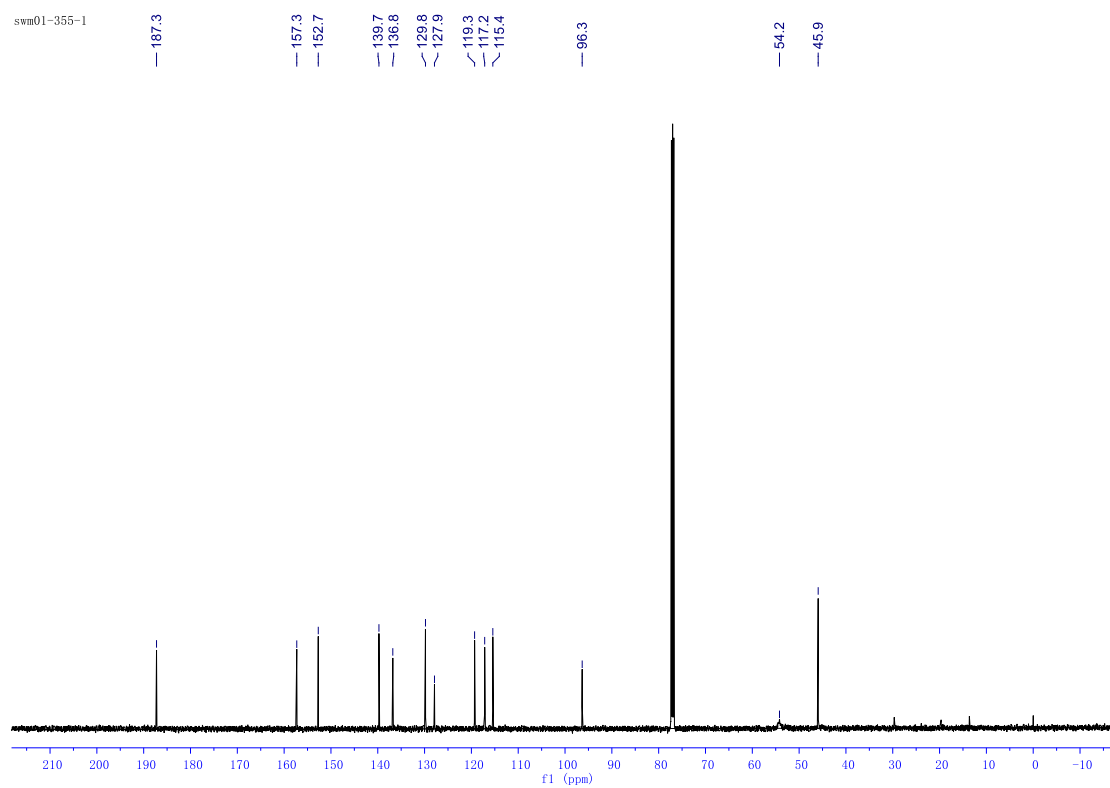

# Supplementary Information

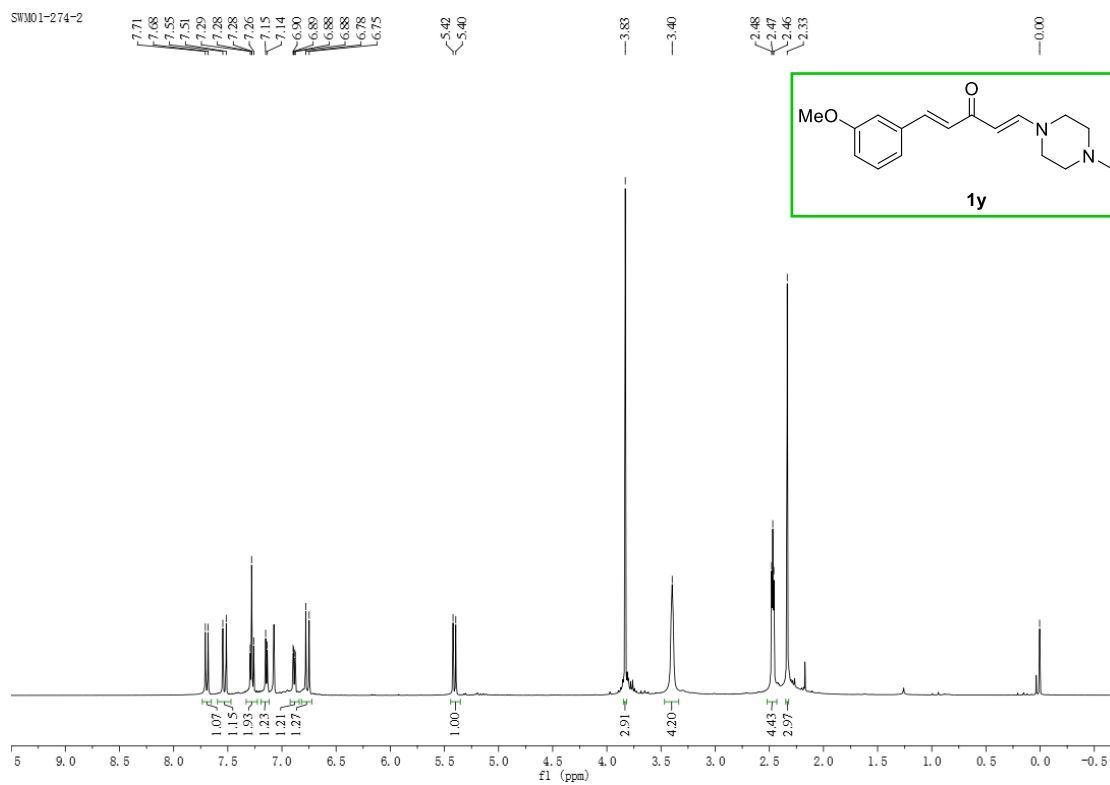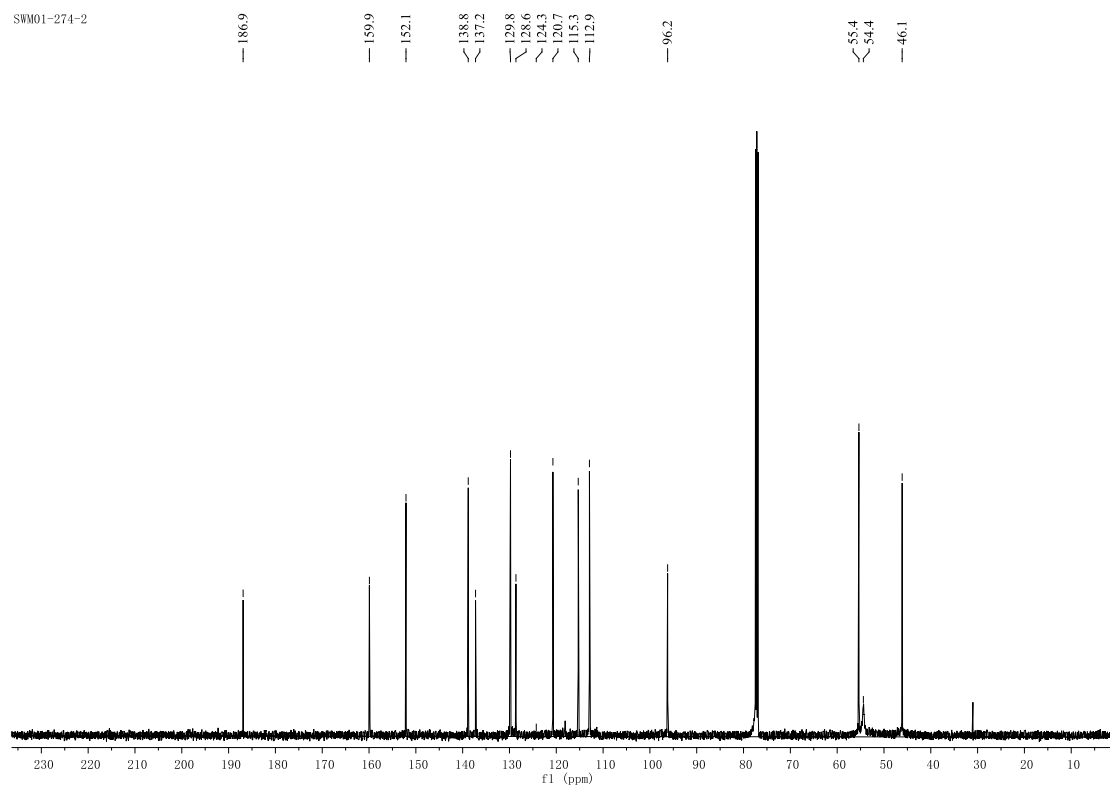

# Supplementary Information

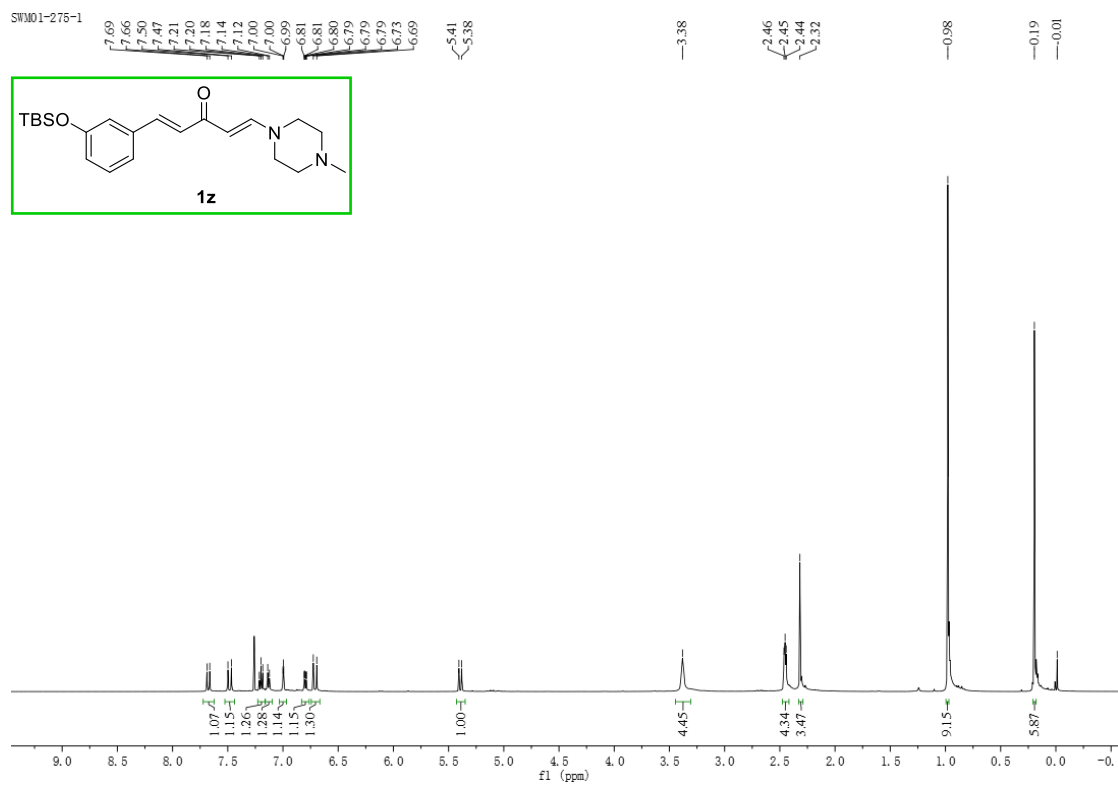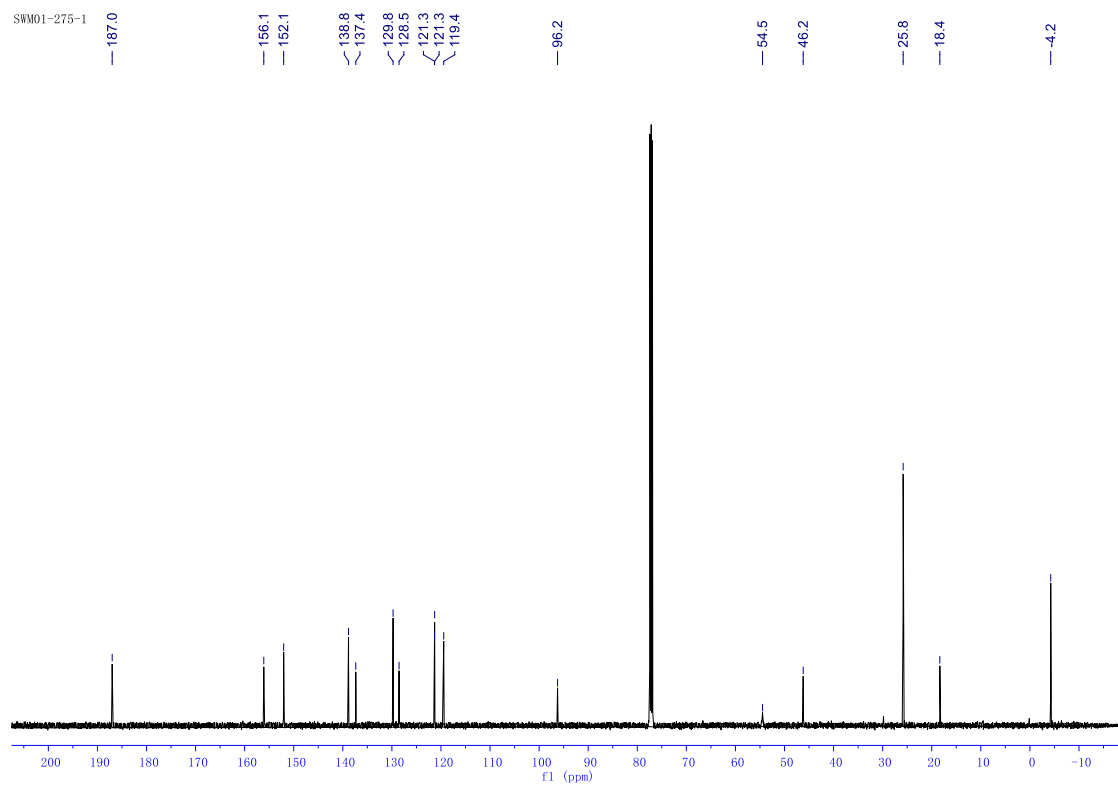

# Supplementary Information

swm01-263-2A

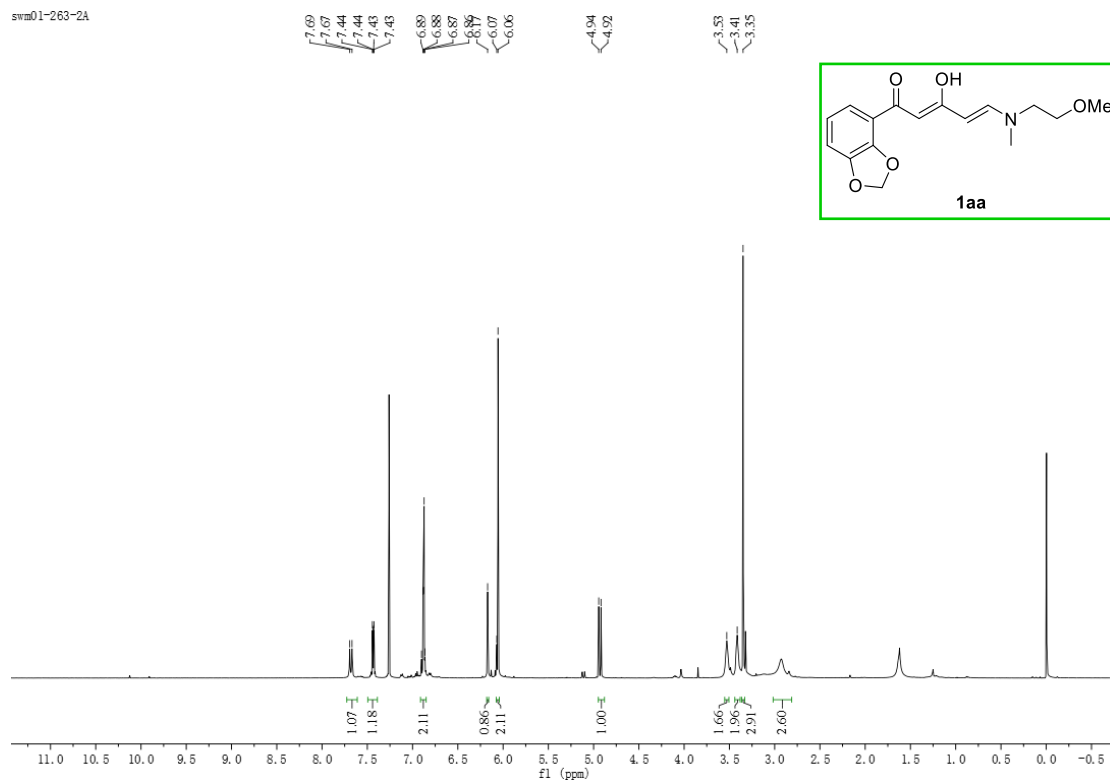

swm01-263-2A

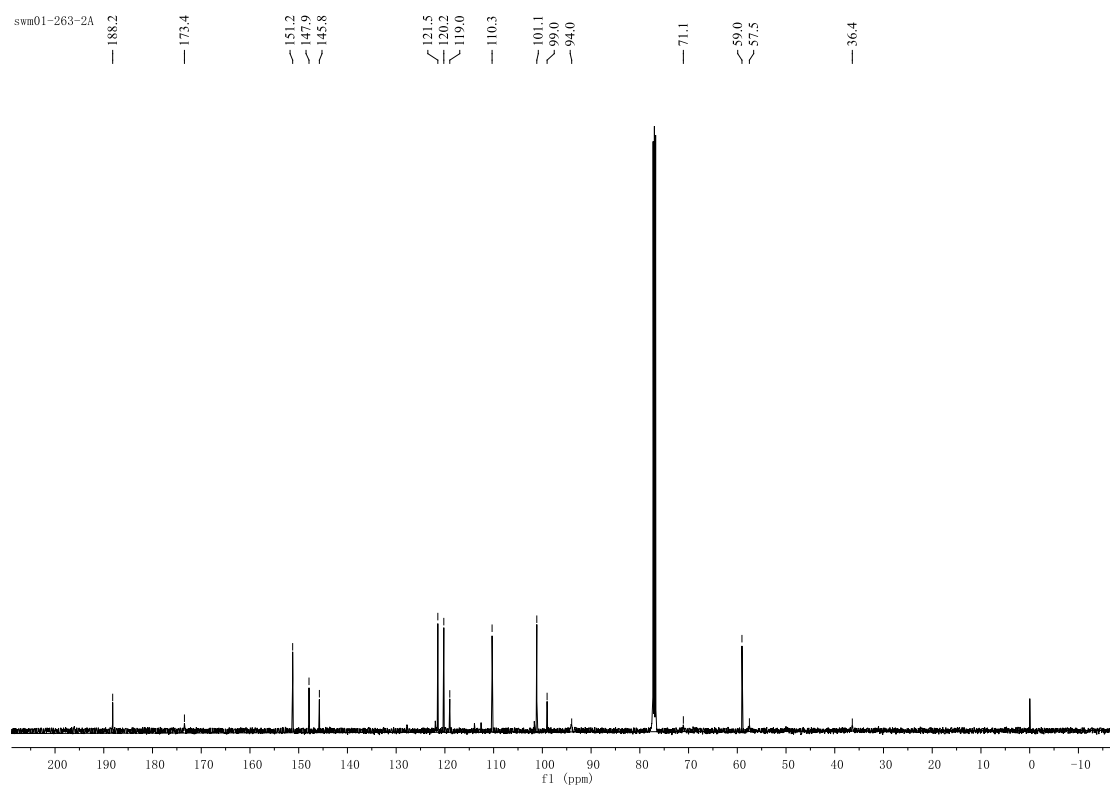



# Supplementary Information

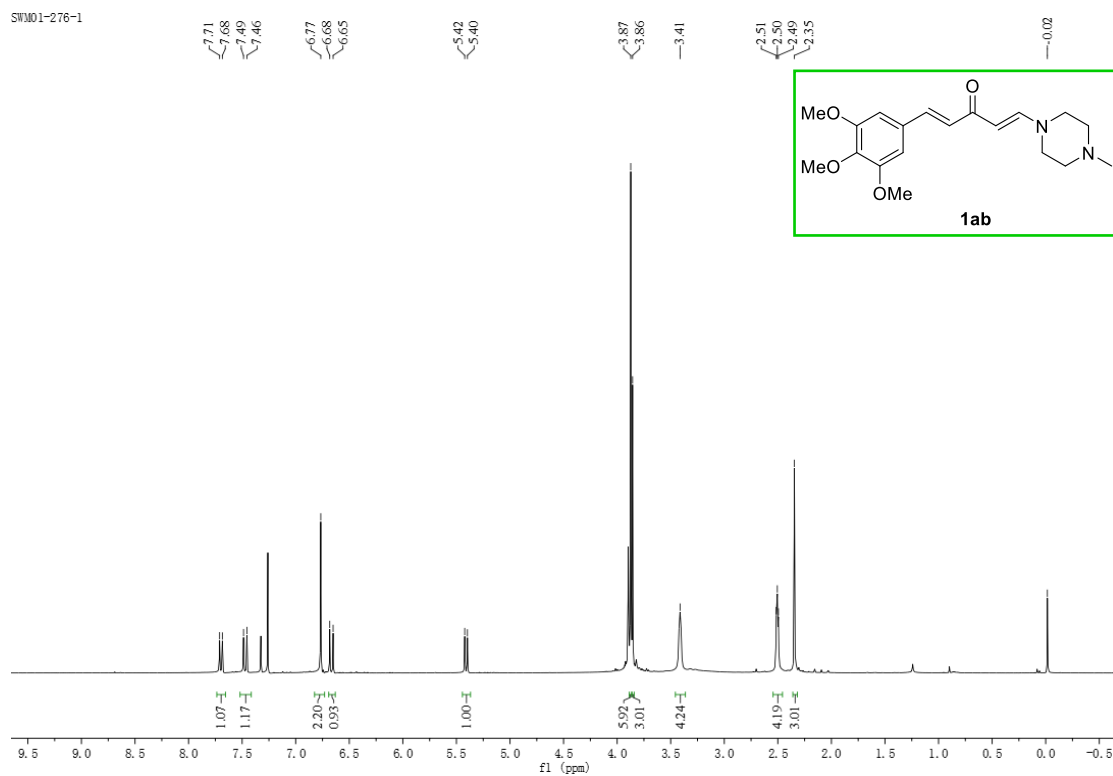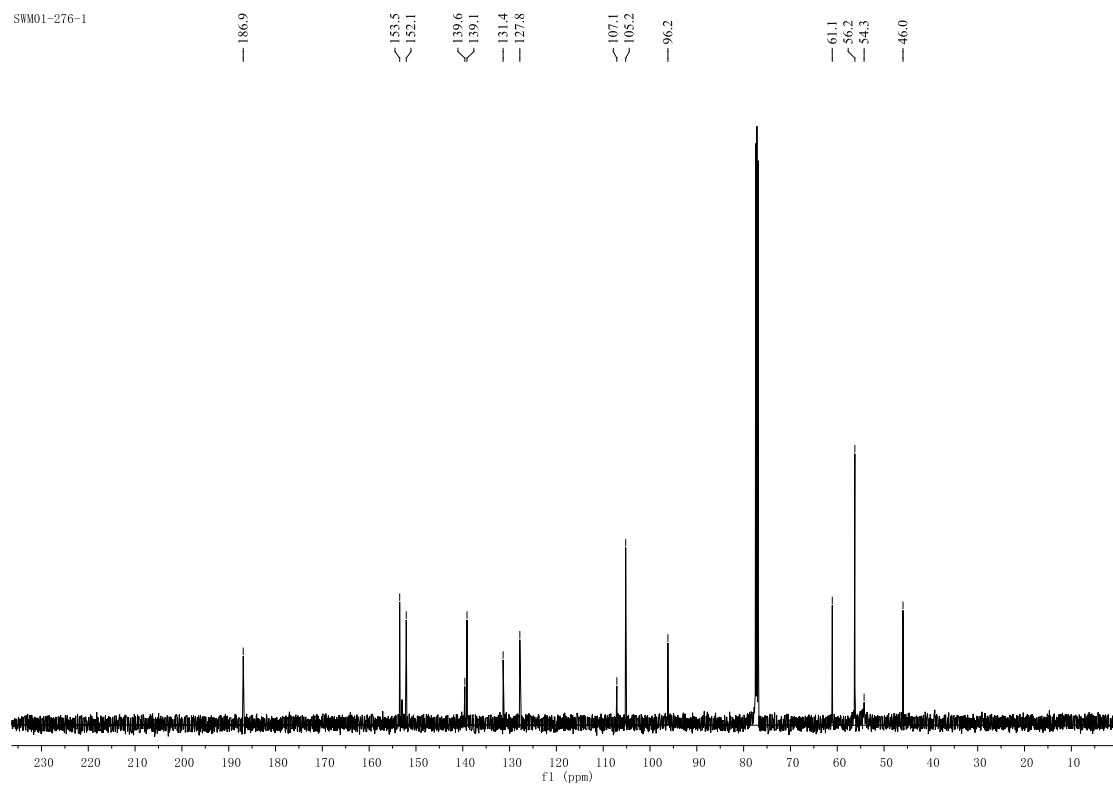

# Supplementary Information

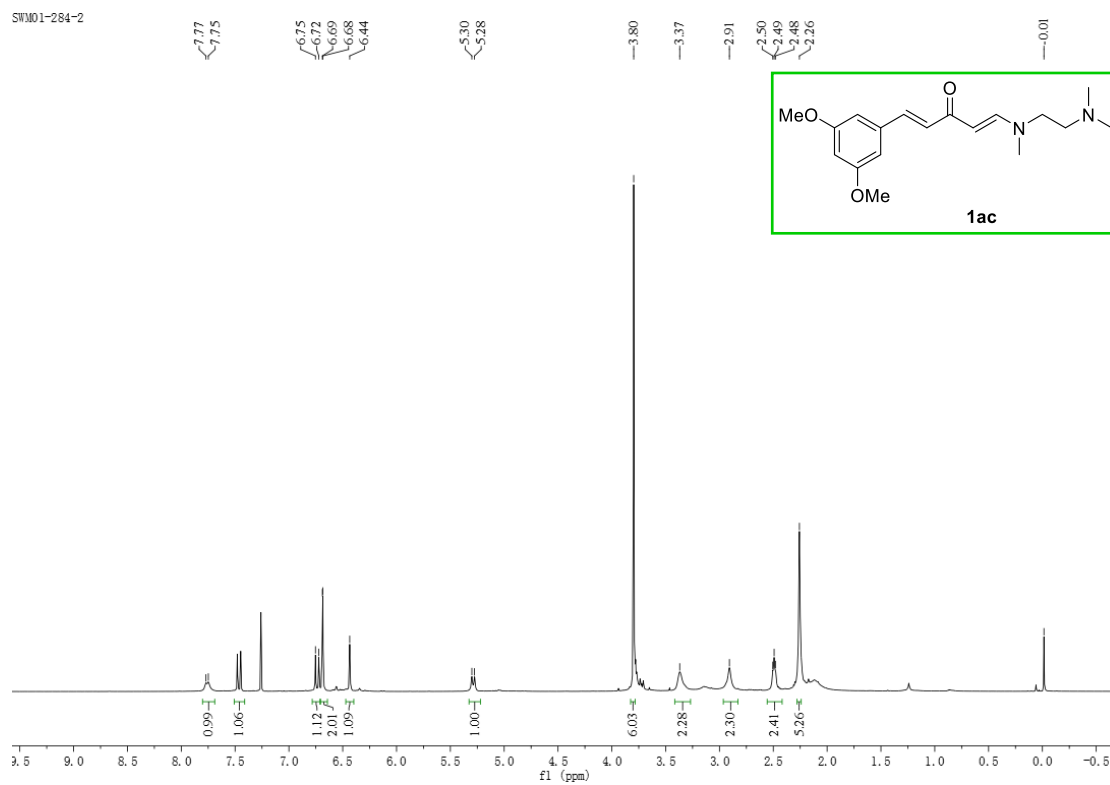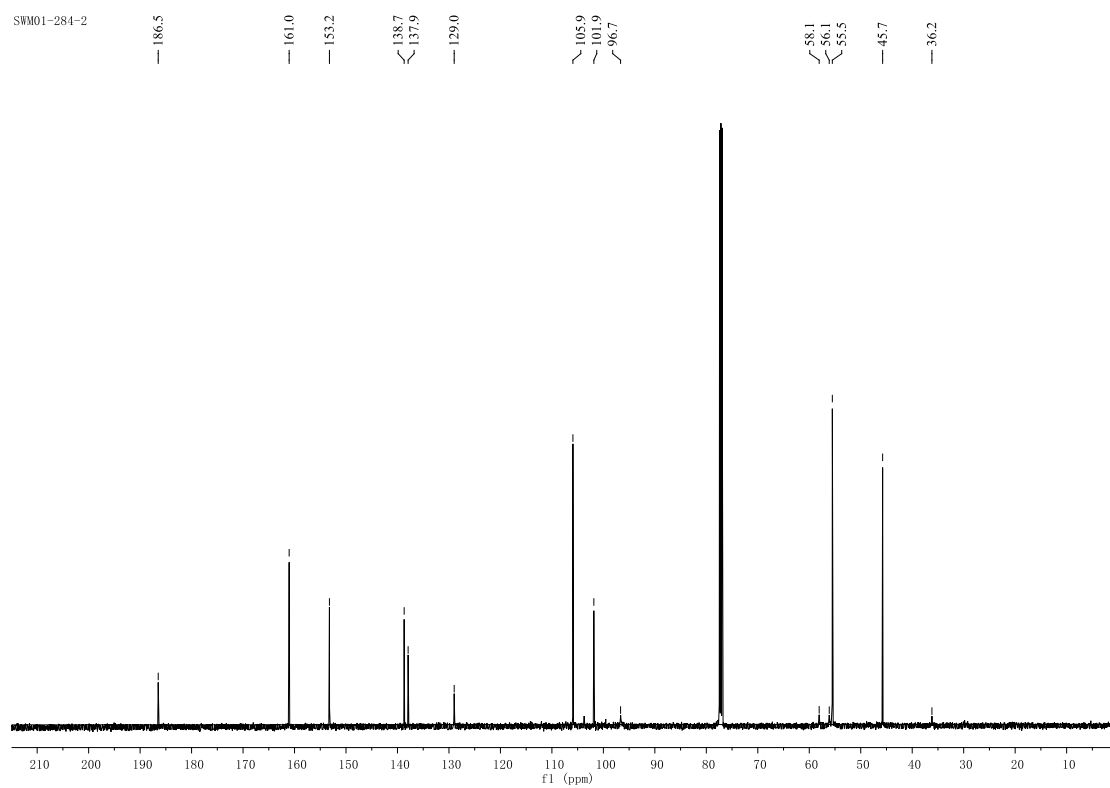

# Supplementary Information

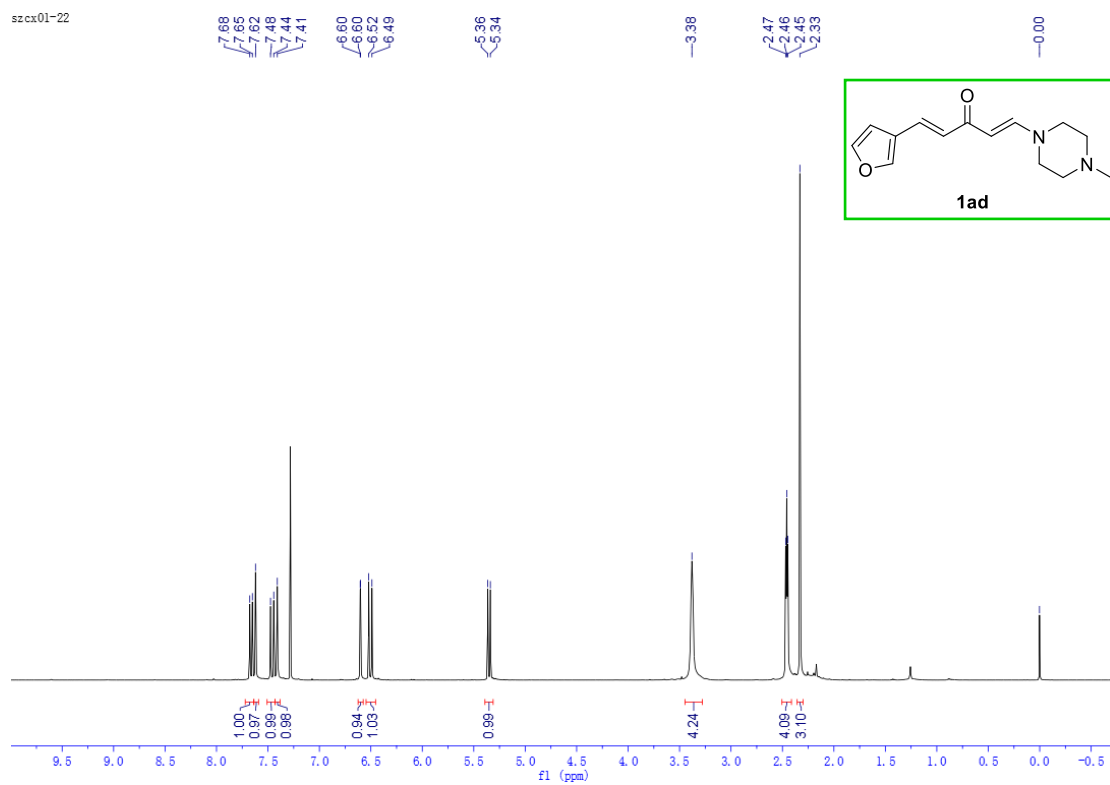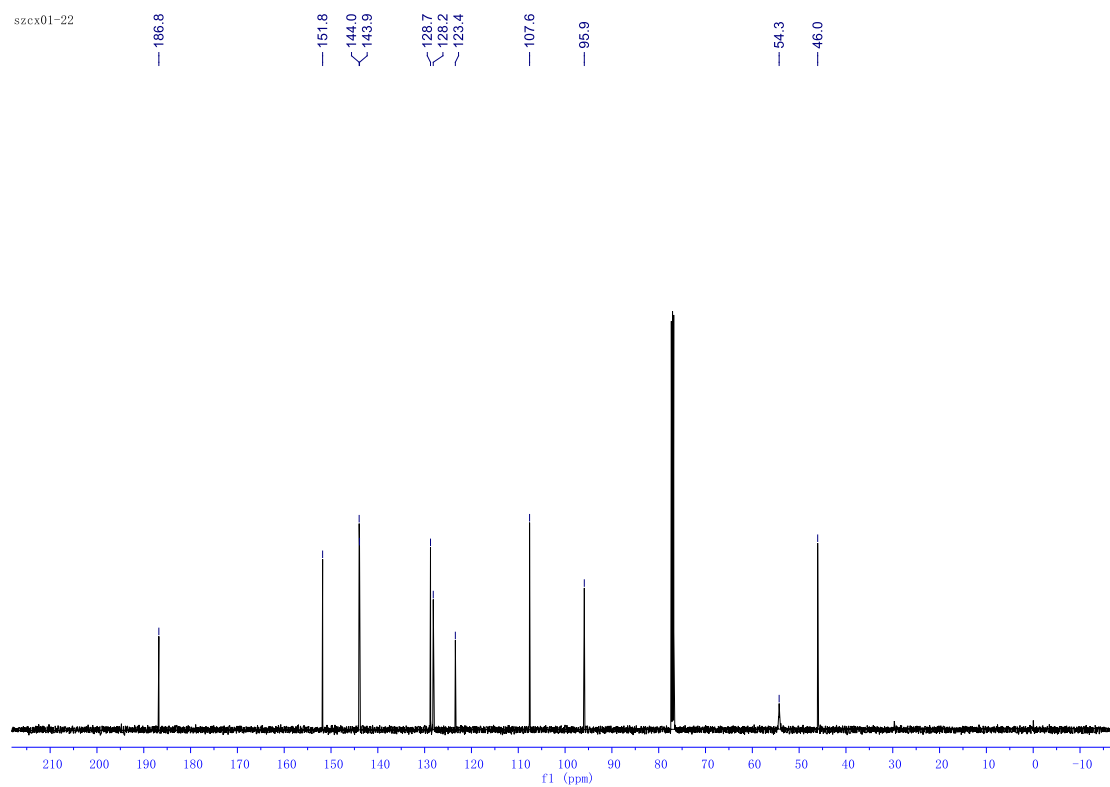

# Supplementary Information

SZCX01-20A

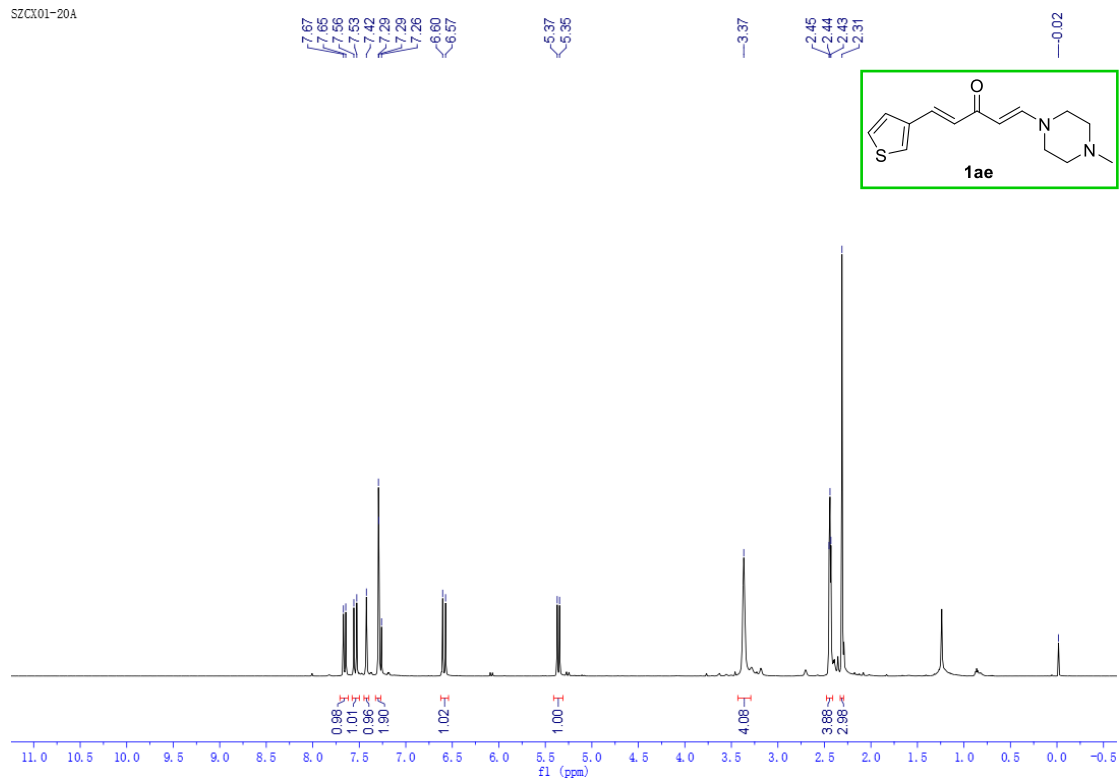

SZCX01-20A

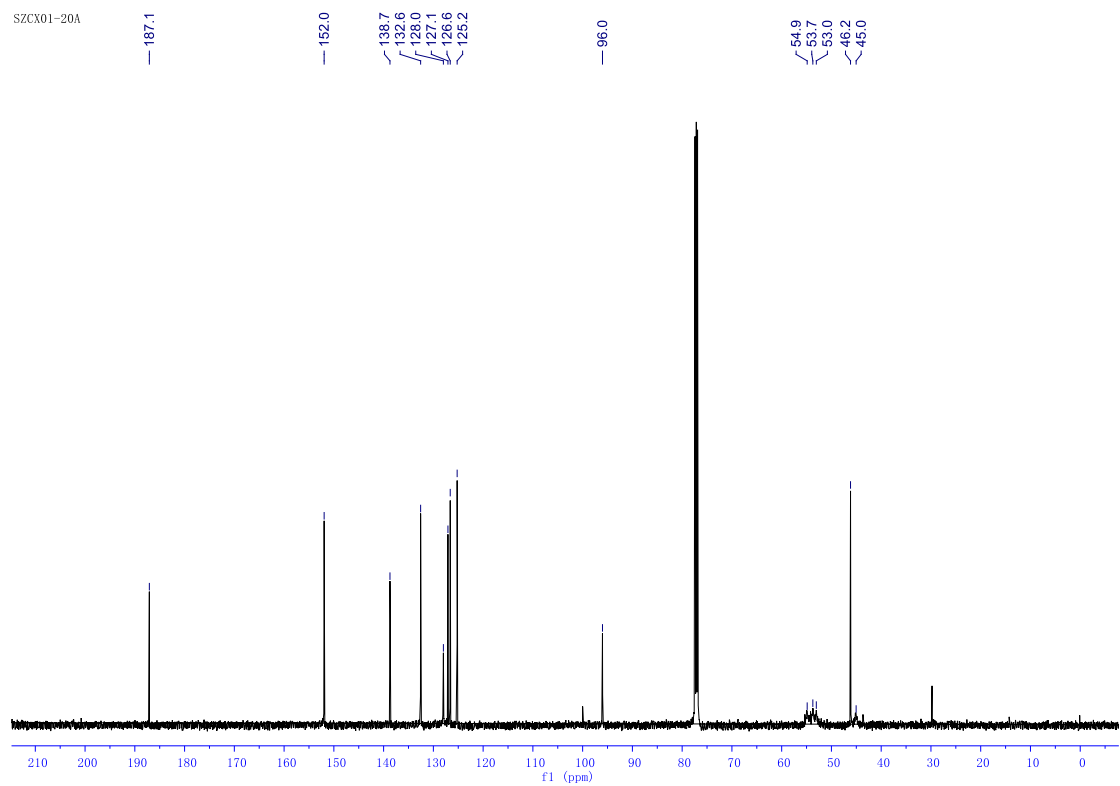

# Supplementary Information

SZCX01-25B

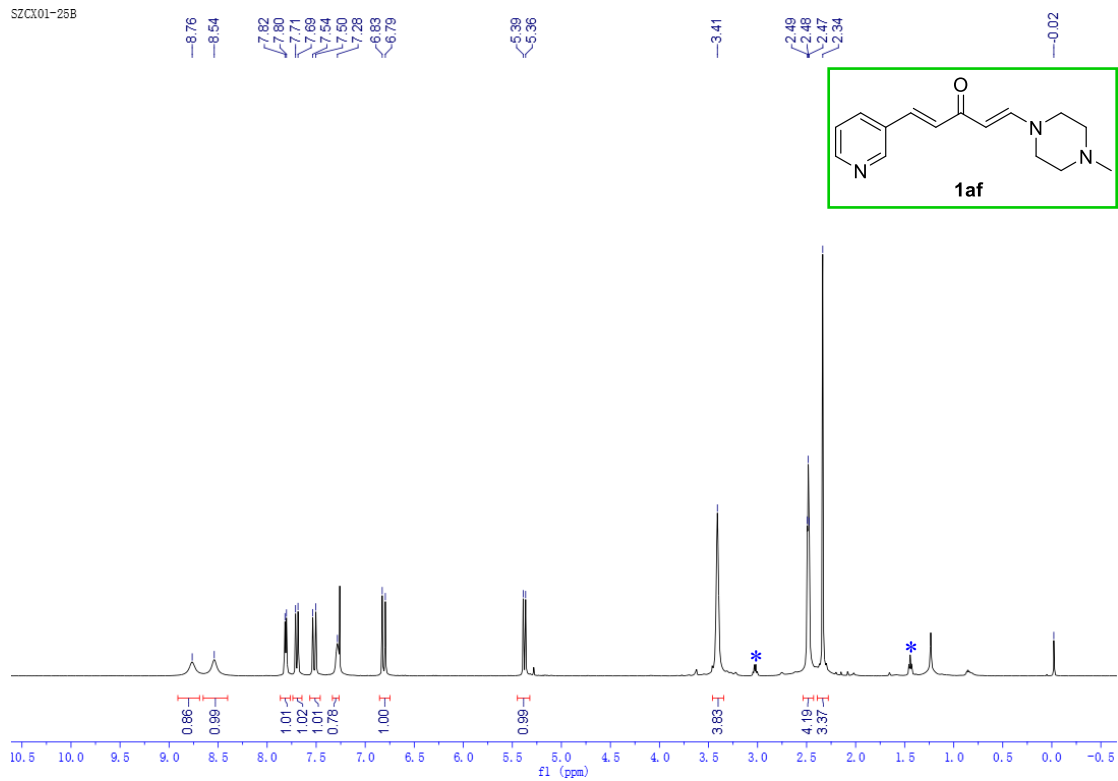

\* HNEt<sub>2</sub>

szcx01-25B

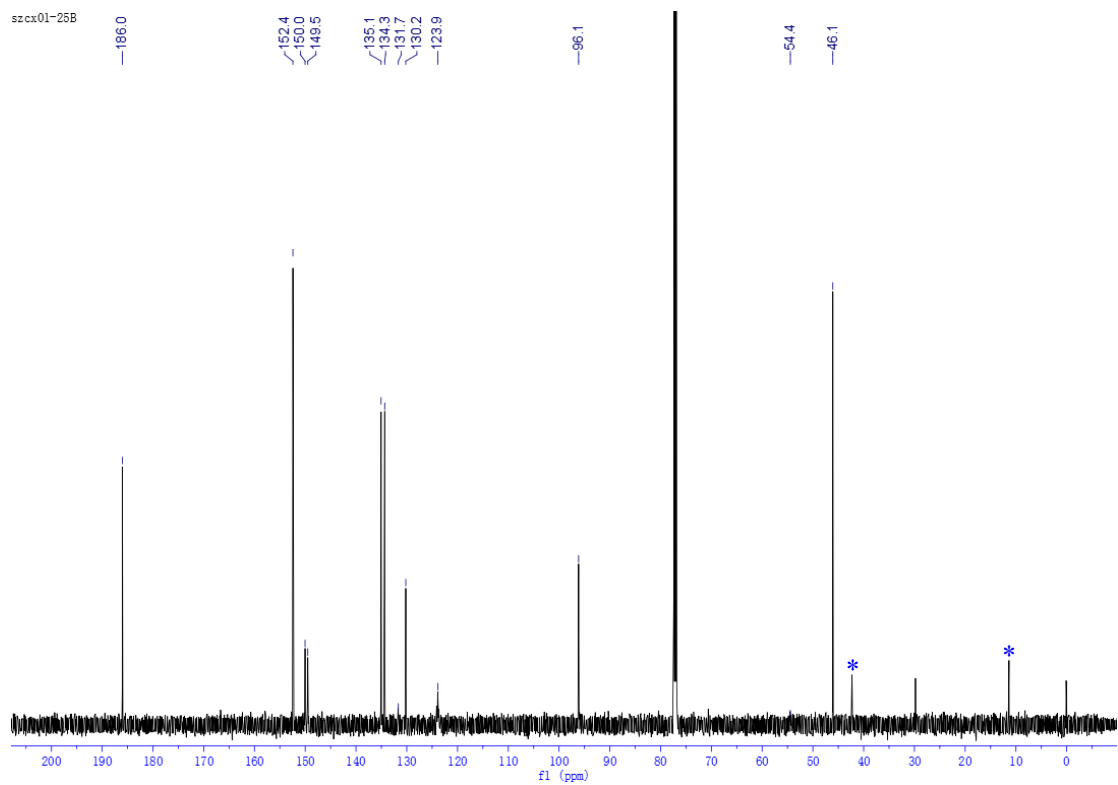

# Supplementary Information

SM01-204-2A

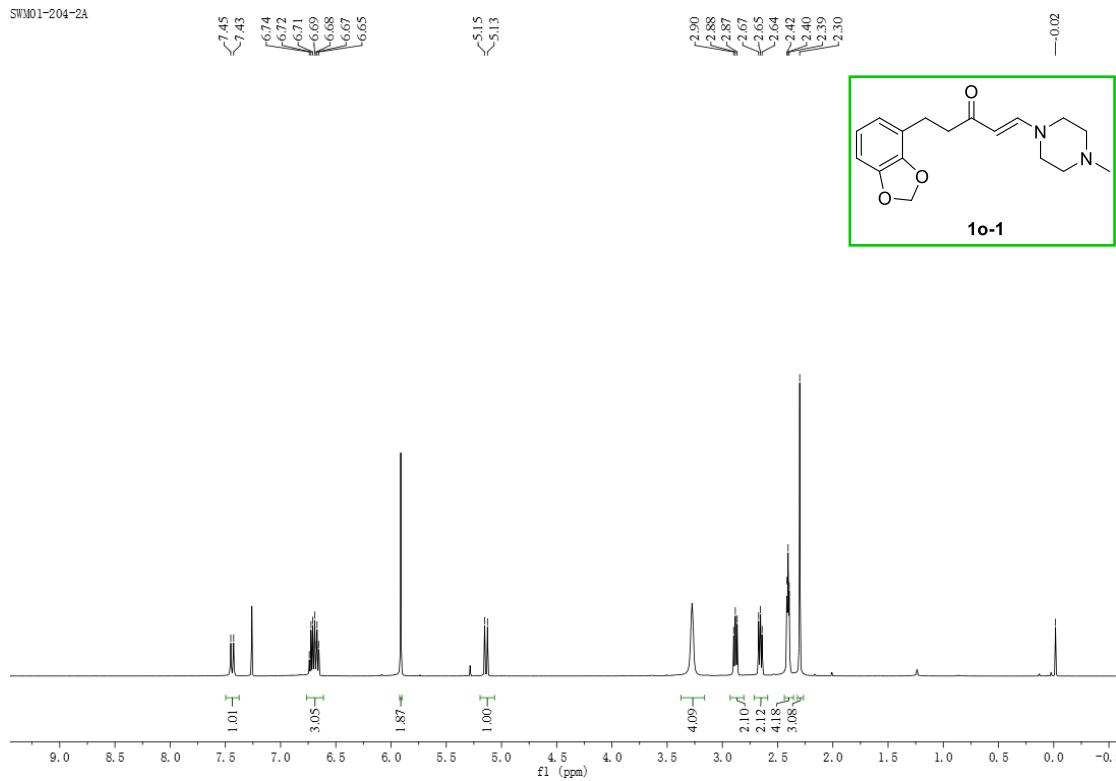

SM01-204-2A

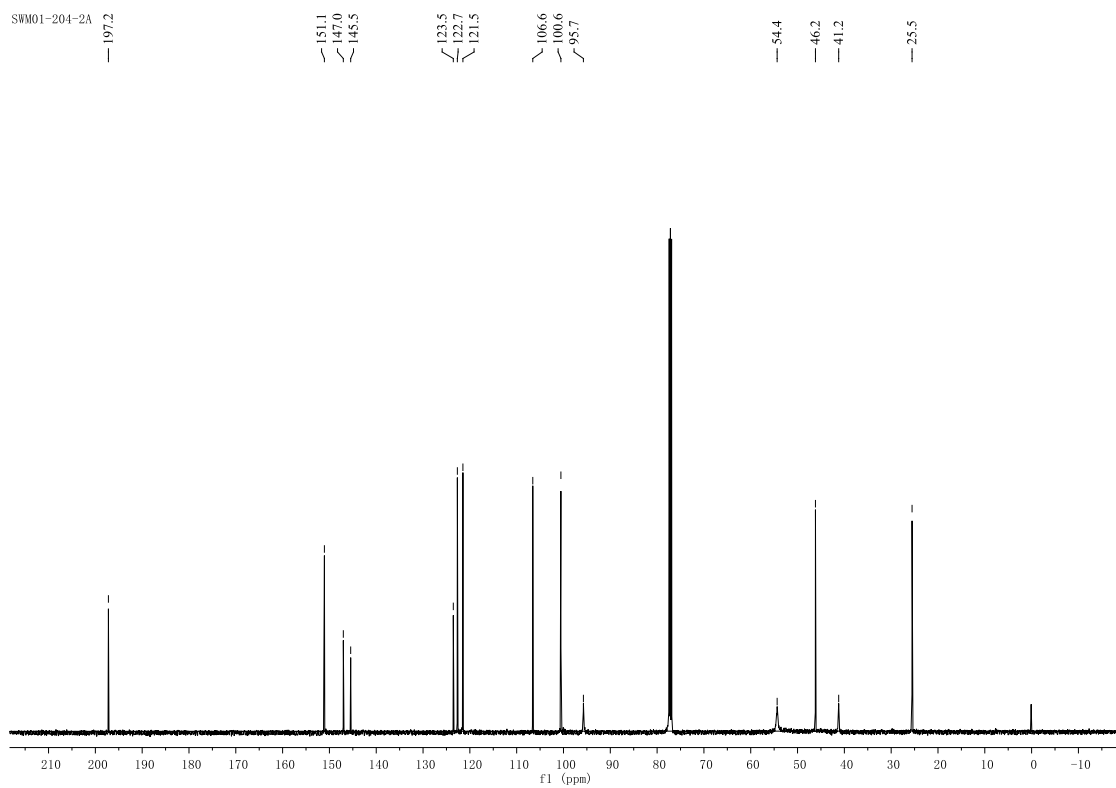

# Supplementary Information

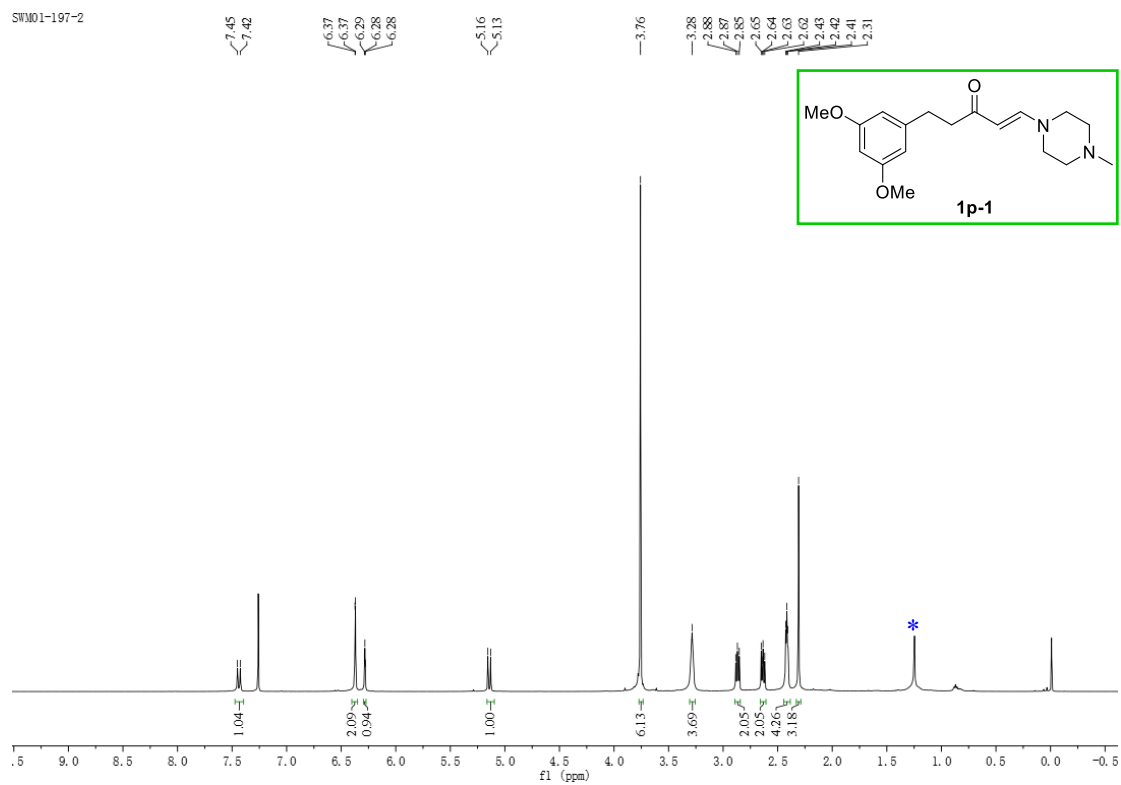

\* grease

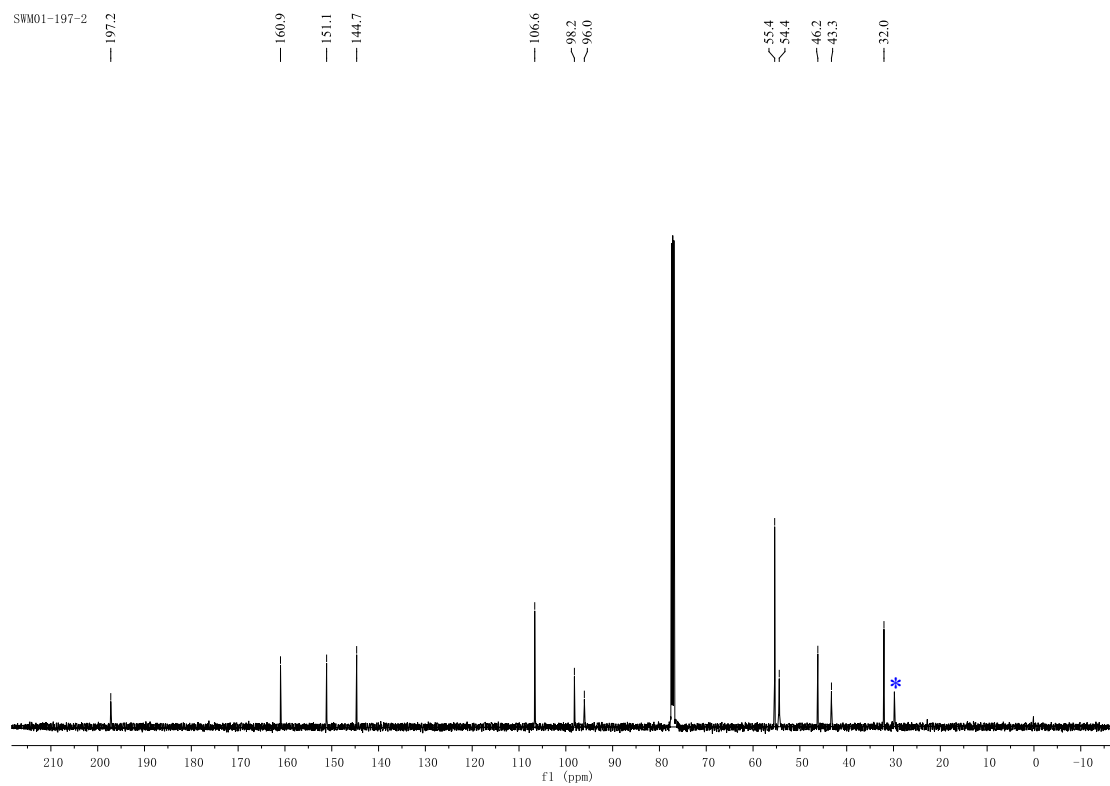

# Supplementary Information

Szcx01-191-2

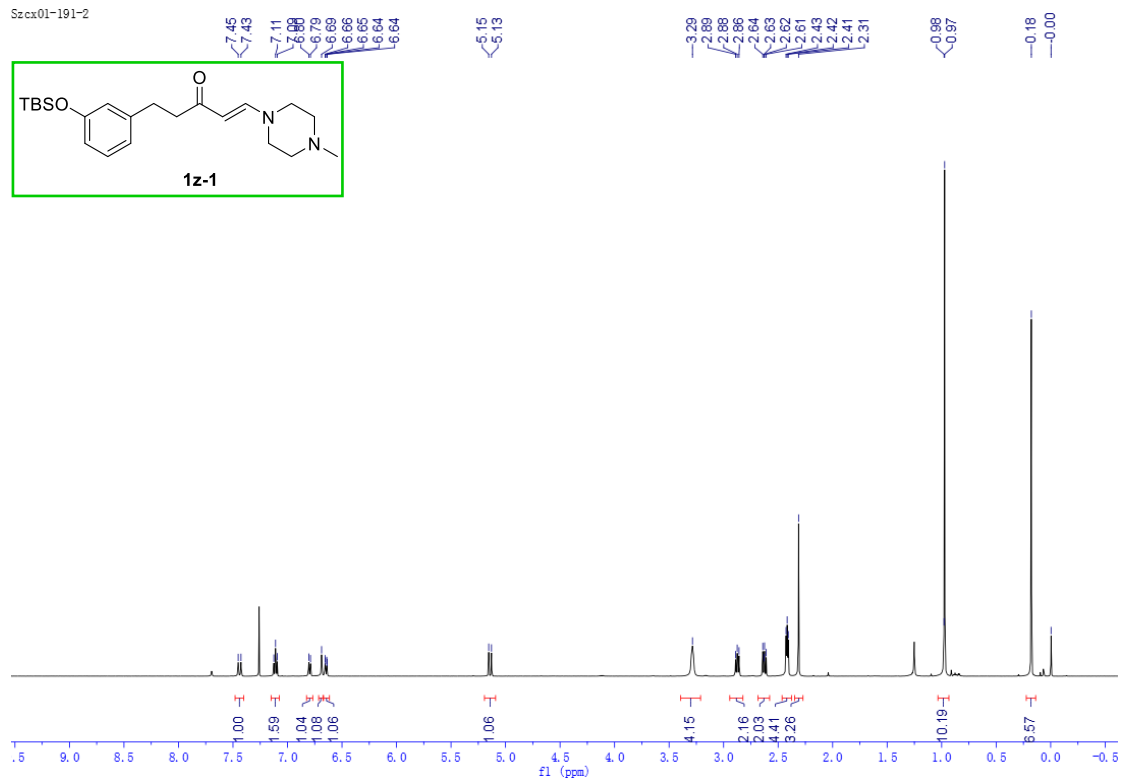

Szcx01-191-2

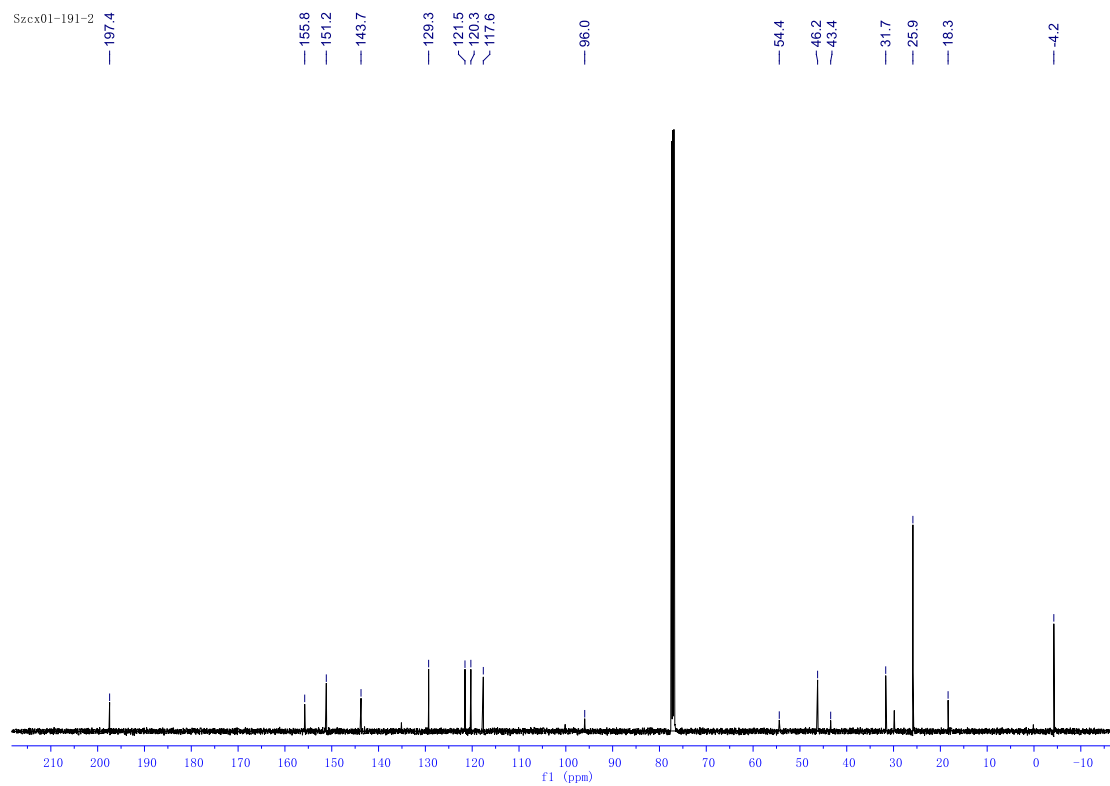



## Supplementary Information

### 5. HPLC traces of synthetic compounds for biological evaluation

<Chromatogram>

**Analytical column:** Eclipse XDB-C18 5um (4.6×250 mm); **Velocity of flow:** 1mL/min

**Method A:** 0.00-2.00min: 70% MeOH/30% H<sub>2</sub>O; 2.01-15.00min: form 70% MeOH/30% H<sub>2</sub>O to 100% MeOH; 15.00-20.00min: 100% MeOH; 20.01-25.00min: 70% MeOH/30% H<sub>2</sub>O

**Method B:** 0.00-2.00min: 45% MeOH/55% H<sub>2</sub>O; 2.01-15.00min: form 45% MeOH/55% H<sub>2</sub>O to 100% MeOH; 15.00-20.00min: 100% MeOH; 20.01-25.00min: 45% MeOH/55% H<sub>2</sub>O

Unless otherwise noted, method A was used for HPLC analysis

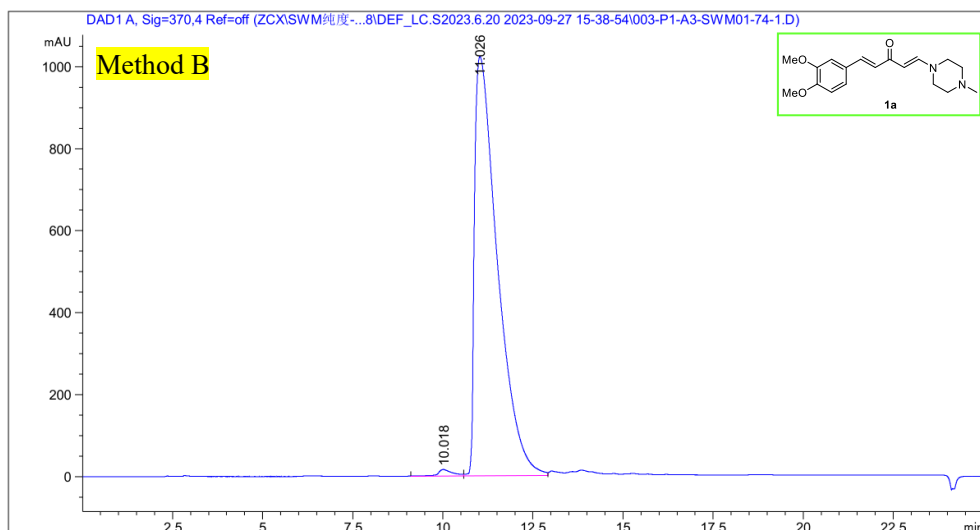

<Peak Table>

| Peak  | Ret.time [min] | Area [mAU*s] | Height [mAU] | Area %  |
|-------|----------------|--------------|--------------|---------|
| 1     | 10.018         | 457.96048    | 16.10763     | 1.0039  |
| 2     | 11.026         | 4.51609e4    | 1023.83093   | 98.9961 |
| Total |                | 4.56189e4    | 1039.93856   | 100%    |

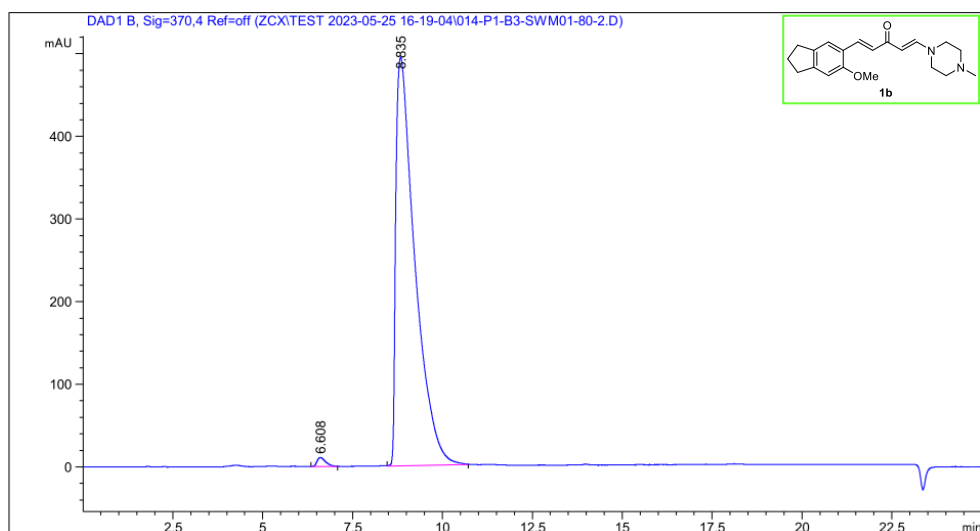

<Peak Table>

| Peak  | Ret.time [min] | Area [mAU*s] | Height [mAU] | Area %  |
|-------|----------------|--------------|--------------|---------|
| 1     | 6.608          | 184.07951    | 10.84945     | 1.0015  |
| 2     | 8.835          | 1.81970e4    | 494.08472    | 98.9985 |
| Total |                | 1.83811e4    | 504.93417    | 100%    |

## Supplementary Information

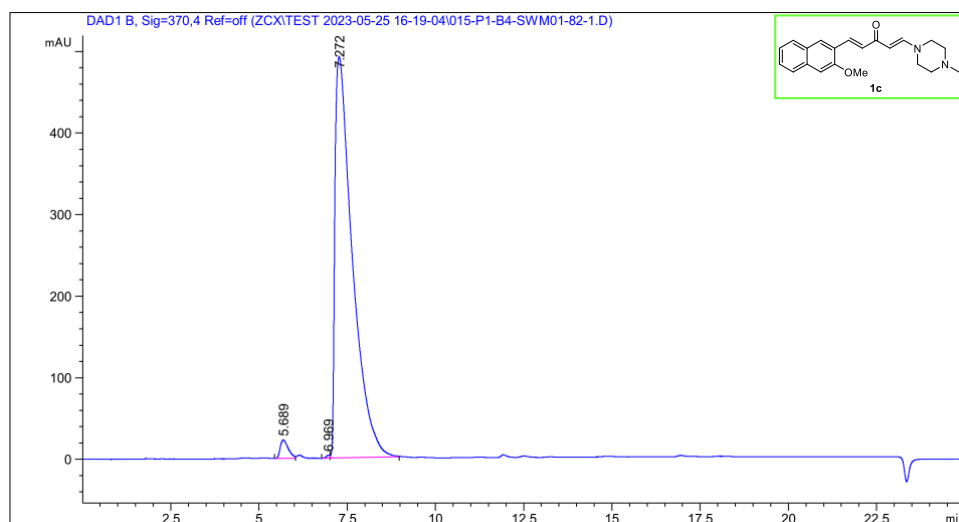

<Peak Table>

| Peak  | Ret.time [min] | Area [mAU*s] | Height [mAU] | Area %  |
|-------|----------------|--------------|--------------|---------|
| 1     | 5.689          | 360.50446    | 22.55700     | 2.0912  |
| 2     | 6.969          | 24.786872    | 3.57796      | 0.1438  |
| 3     | 7.272          | 1.68536e4    | 491.97061    | 97.7650 |
| Total |                | 1.72389e4    | 518.10557    | 100%    |

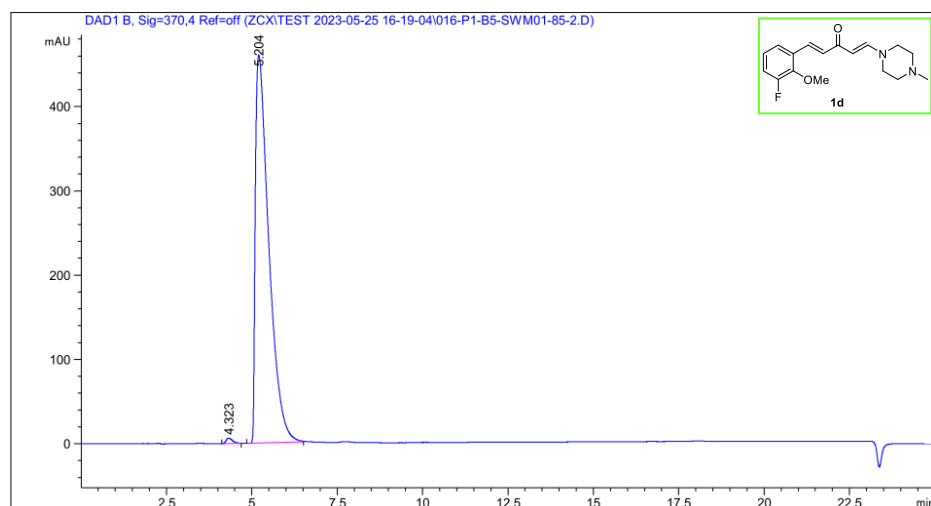

<Peak Table>

| Peak  | Ret.time [min] | Area [mAU*s] | Height [mAU] | Area %  |
|-------|----------------|--------------|--------------|---------|
| 1     | 4.323          | 85.77954     | 6.47273      | 0.6780  |
| 2     | 5.204          | 1.25657e4    | 460.20627    | 99.3220 |
| Total |                | 1.26514e4    | 466.67900    | 100%    |

## Supplementary Information

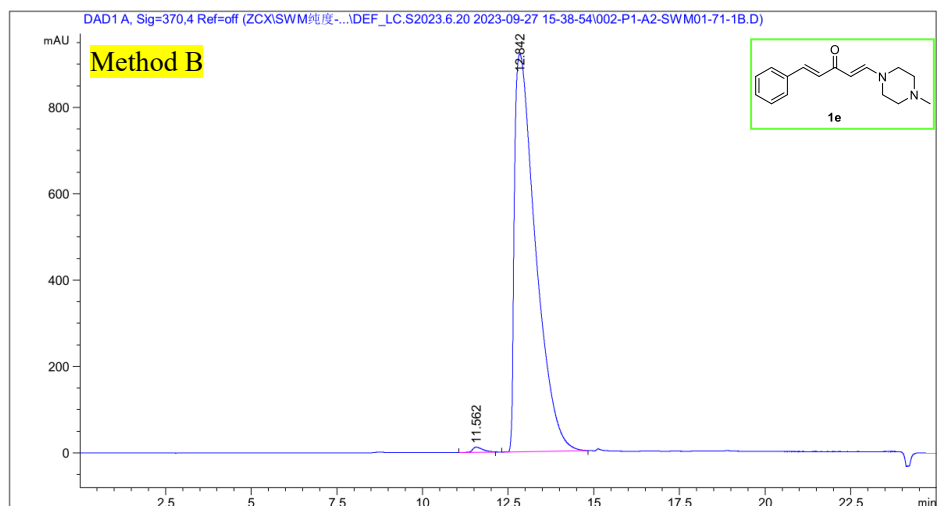

<Peak Table>

| Peak  | Ret.time [min] | Area [mAU*s] | Height [mAU] | Area %  |
|-------|----------------|--------------|--------------|---------|
| 1     | 11.562         | 259.51498    | 12.18440     | 0.6543  |
| 2     | 12.842         | 3.94017e4    | 920.89319    | 99.3457 |
| Total |                | 3.96612e4    | 933.07759    | 100%    |

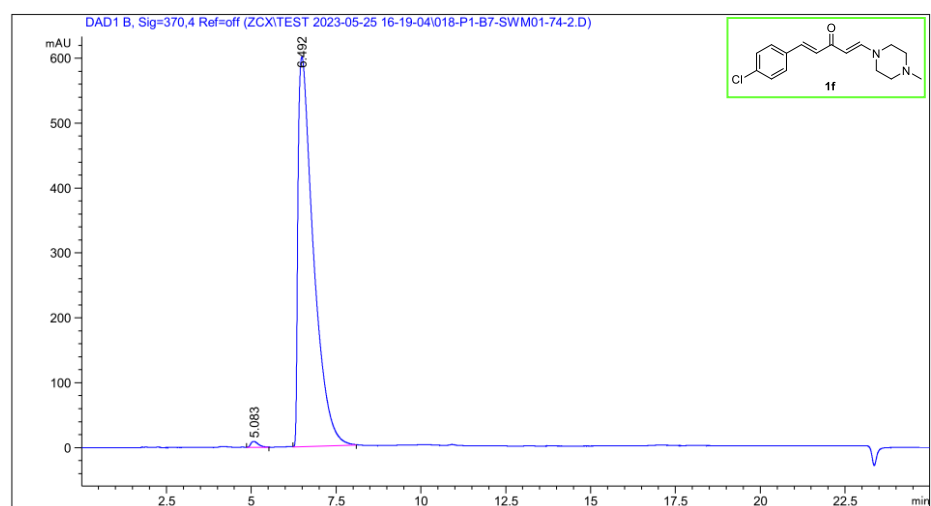

<Peak Table>

| Peak  | Ret.time [min] | Area [mAU*s] | Height [mAU] | Area %  |
|-------|----------------|--------------|--------------|---------|
| 1     | 5.083          | 139.15068    | 9.09592      | 0.7284  |
| 2     | 6.492          | 1.89638e4    | 600.68518    | 99.2716 |
| Total |                | 1.91030e4    | 609.78110    | 100%    |

## Supplementary Information

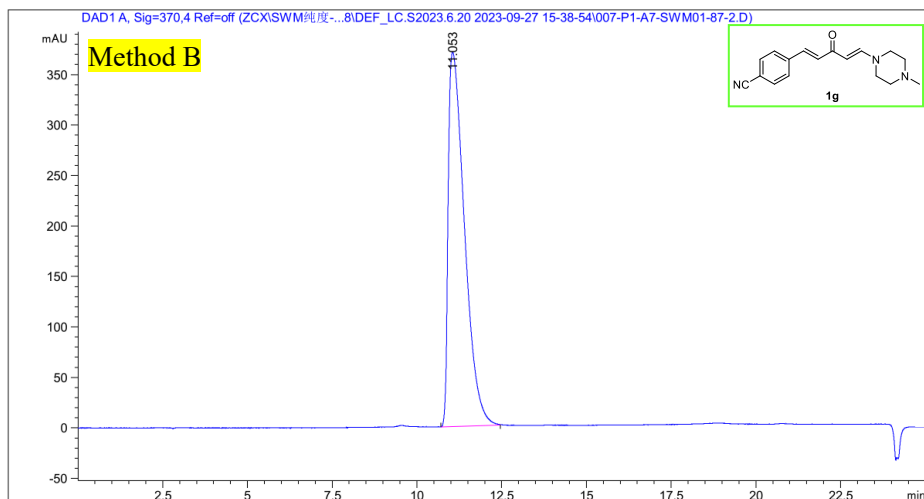

<Peak Table>

| Peak  | Ret.time [min] | Area [mAU*s] | Height [mAU] | Area %   |
|-------|----------------|--------------|--------------|----------|
| 1     | 11.053         | 1.23426e4    | 370.79663    | 100.0000 |
| Total |                | 1.23426e4    | 370.79663    | 100%     |

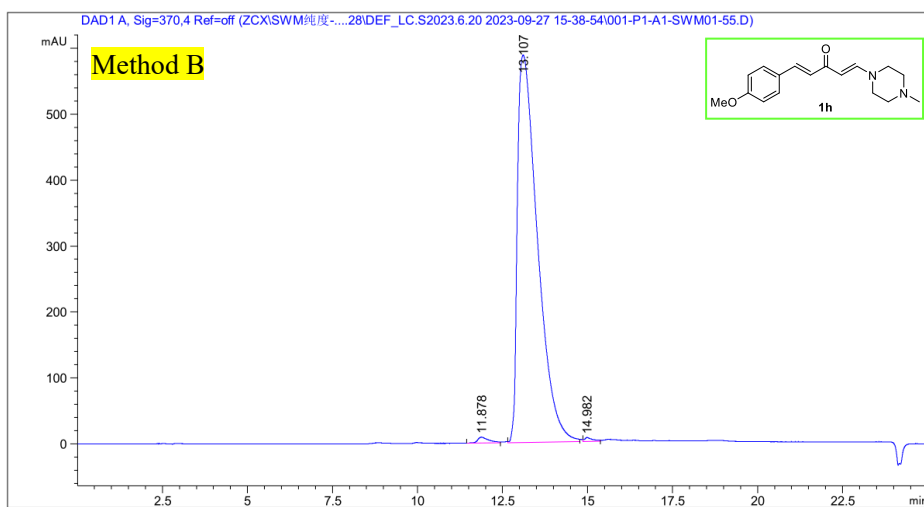

<Peak Table>

| Peak  | Ret.time [min] | Area [mAU*s] | Height [mAU] | Area %  |
|-------|----------------|--------------|--------------|---------|
| 1     | 11.878         | 200.08829    | 8.86525      | 0.8195  |
| 2     | 13.107         | 2.41092e4    | 587.59375    | 98.7472 |
| 3     | 14.982         | 105.78890    | 6.23174      | 0.4333  |
| Total |                | 2.44151e4    | 602.69075    | 100%    |

## Supplementary Information

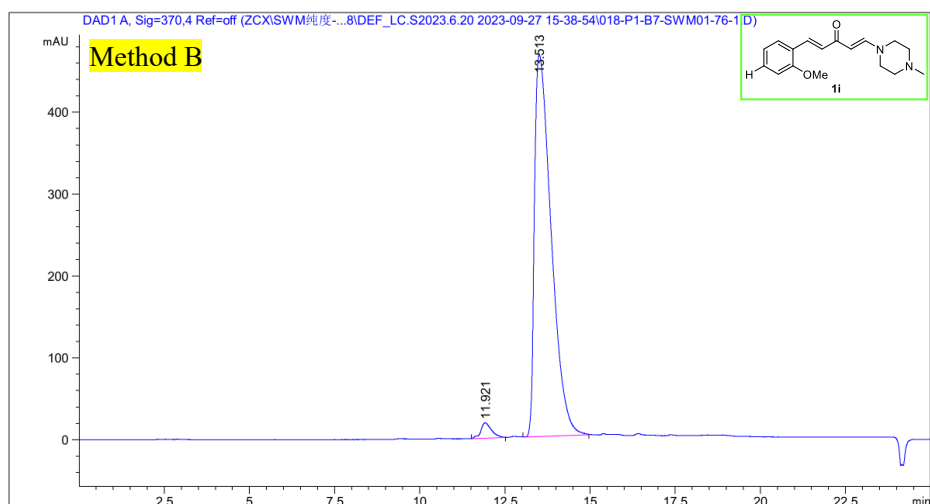

<Peak Table>

| Peak         | Ret.time [min] | Area [mAU*s]     | Height [mAU]     | Area %      |
|--------------|----------------|------------------|------------------|-------------|
| 1            | 11.921         | 413.65088        | 18.79803         | 2.5344      |
| 2            | 13.513         | 1.59077e4        | 465.74844        | 97.4656     |
| <b>Total</b> |                | <b>1.63213e4</b> | <b>484.54648</b> | <b>100%</b> |

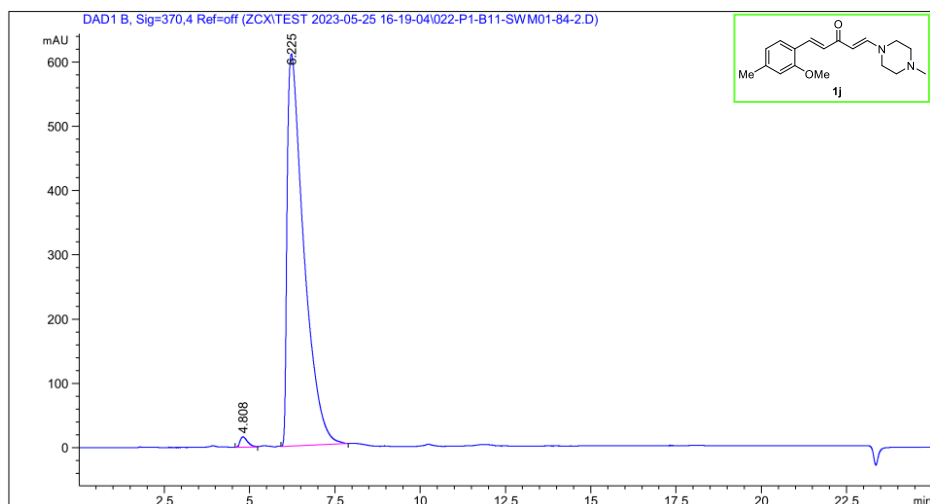

<Peak Table>

| Peak         | Ret.time [min] | Area [mAU*s]     | Height [mAU]     | Area %      |
|--------------|----------------|------------------|------------------|-------------|
| 1            | 4.808          | 248.42706        | 16.12818         | 1.1843      |
| 2            | 6.225          | 2.07290e4        | 610.08374        | 98.8157     |
| <b>Total</b> |                | <b>2.09774e4</b> | <b>626.21192</b> | <b>100%</b> |

## Supplementary Information

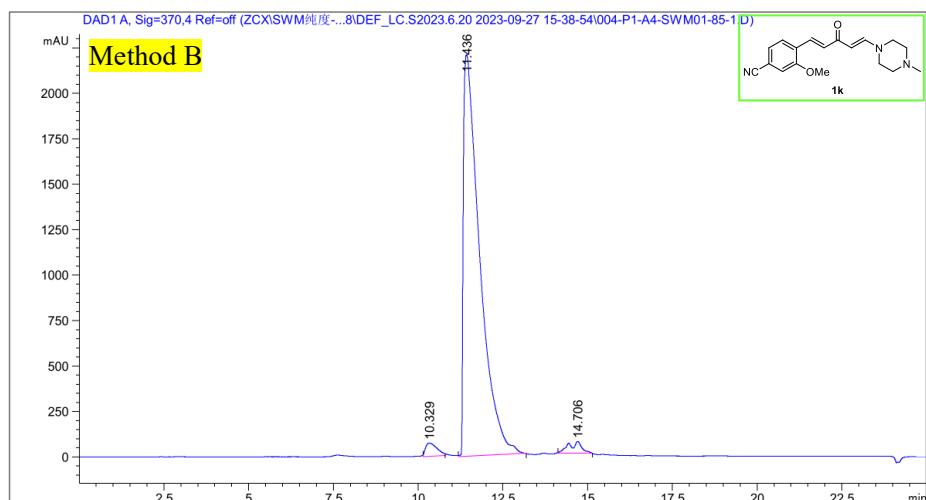

<Peak Table>

| Peak  | Ret.time [min] | Area [mAU*s] | Height [mAU] | Area %  |
|-------|----------------|--------------|--------------|---------|
| 1     | 10.329         | 1729.49768   | 73.18595     | 2.2357  |
| 2     | 11.436         | 7.39151e4    | 2211.71118   | 95.5481 |
| 3     | 14.706         | 1714.41492   | 64.30698     | 2.2162  |
| Total |                | 7.73590e4    | 2349.20412   | 100%    |

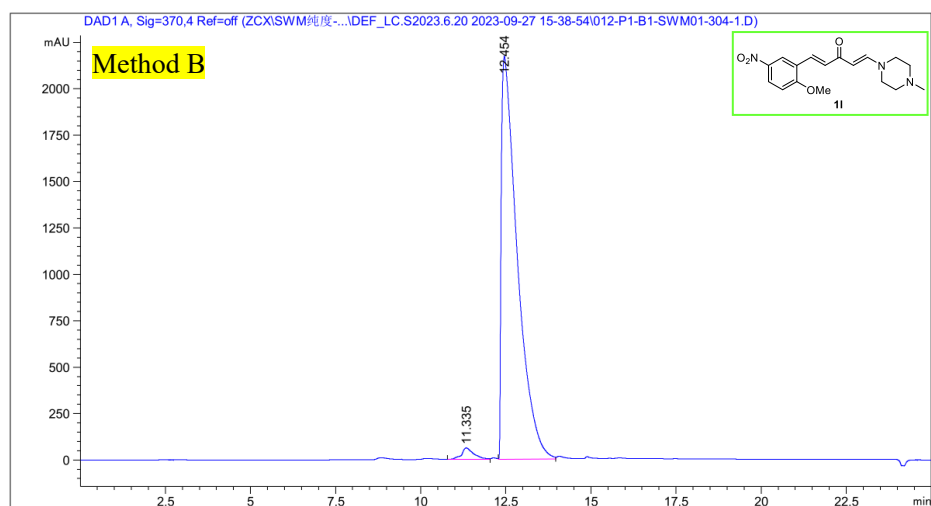

<Peak Table>

| Peak  | Ret.time [min] | Area [mAU*s] | Height [mAU] | Area %  |
|-------|----------------|--------------|--------------|---------|
| 1     | 11.335         | 1557.74512   | 62.00557     | 2.1504  |
| 2     | 12.454         | 7.08804e4    | 2173.55908   | 97.8496 |
| Total |                | 7.24382e4    | 2235.56465   | 100%    |

## Supplementary Information

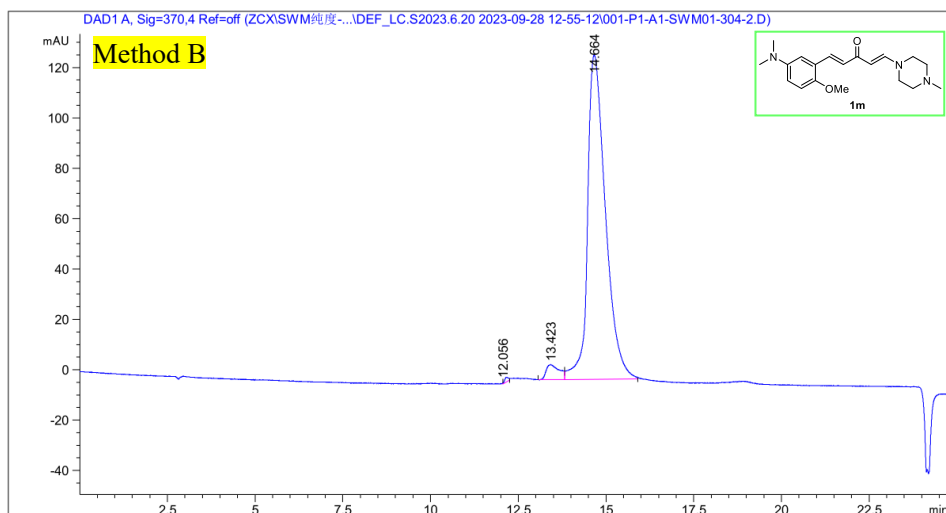

<Peak Table>

| Peak  | Ret.time [min] | Area [mAU*s] | Height [mAU] | Area %  |
|-------|----------------|--------------|--------------|---------|
| 1     | 12.056         | 13.48341     | 1.91061e-1   | 0.2851  |
| 2     | 13.423         | 155.04950    | 5.89483      | 3.2783  |
| 3     | 14.664         | 4560.98682   | 128.80792    | 96.4366 |
| Total |                | 4729.51973   | 134.89381    | 100%    |

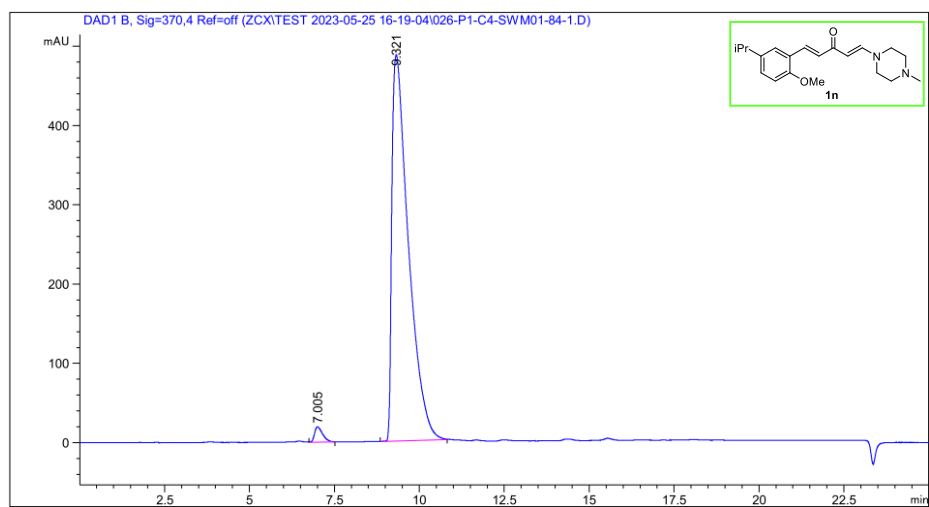

<Peak Table>

| Peak  | Ret.time [min] | Area [mAU*s] | Height [mAU] | Area %  |
|-------|----------------|--------------|--------------|---------|
| 1     | 7.005          | 315.83197    | 19.12069     | 1.8811  |
| 2     | 9.321          | 1.64743e4    | 487.15234    | 98.1189 |
| Total |                | 1.67901e4    | 506.27304    | 100%    |

## Supplementary Information

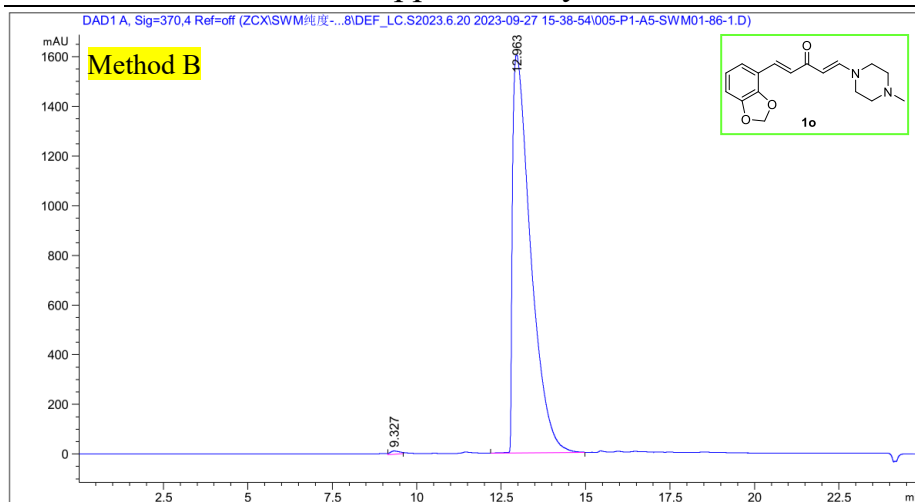

<Peak Table>

| Peak  | Ret.time [min] | Area [mAU*s] | Height [mAU] | Area %  |
|-------|----------------|--------------|--------------|---------|
| 1     | 9.327          | 259.02371    | 13.61027     | 0.4321  |
| 2     | 12.963         | 5.96903e4    | 1603.10754   | 99.5679 |
| Total |                | 5.99493e4    | 1616.71781   | 100%    |

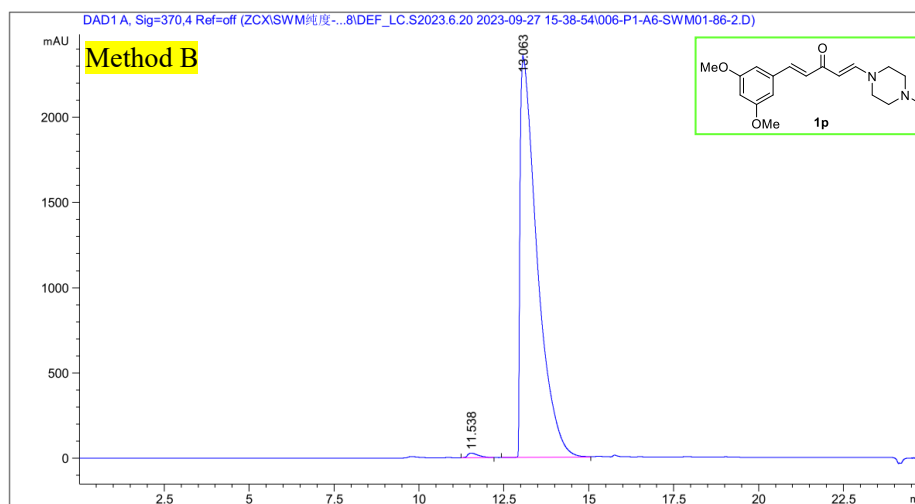

<Peak Table>

| Peak  | Ret.time [min] | Area [mAU*s] | Height [mAU] | Area %  |
|-------|----------------|--------------|--------------|---------|
| 1     | 11.538         | 605.35199    | 27.41299     | 0.7318  |
| 2     | 13.063         | 8.21115e4    | 2363.67554   | 99.2682 |
| Total |                | 8.27169e4    | 2391.08853   | 100%    |



## Supplementary Information

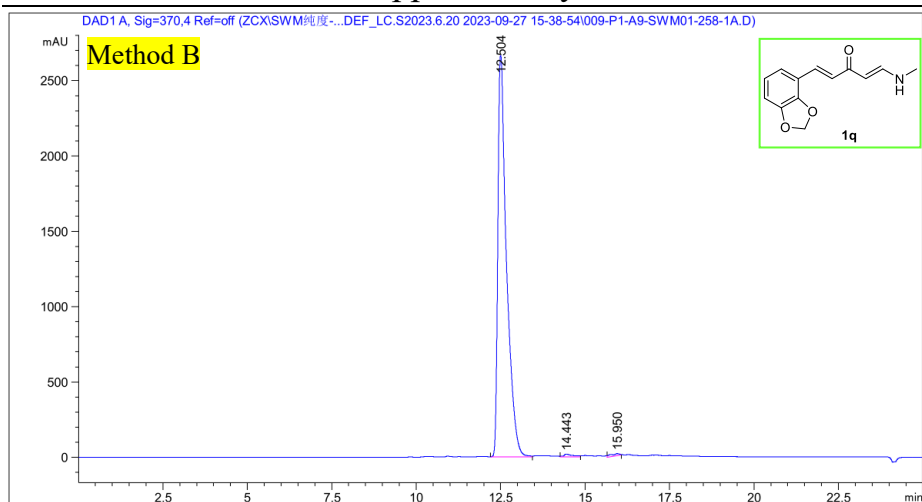

<Peak Table>

| Peak  | Ret.time [min] | Area [mAU*s] | Height [mAU] | Area %  |
|-------|----------------|--------------|--------------|---------|
| 1     | 12.504         | 4.76747e4    | 2665.09058   | 98.6909 |
| 2     | 14.443         | 332.30191    | 18.48947     | 0.6879  |
| 3     | 15.950         | 300.08521    | 14.46169     | 0.6212  |
| Total |                | 4.83071e4    | 2698.04173   | 100%    |

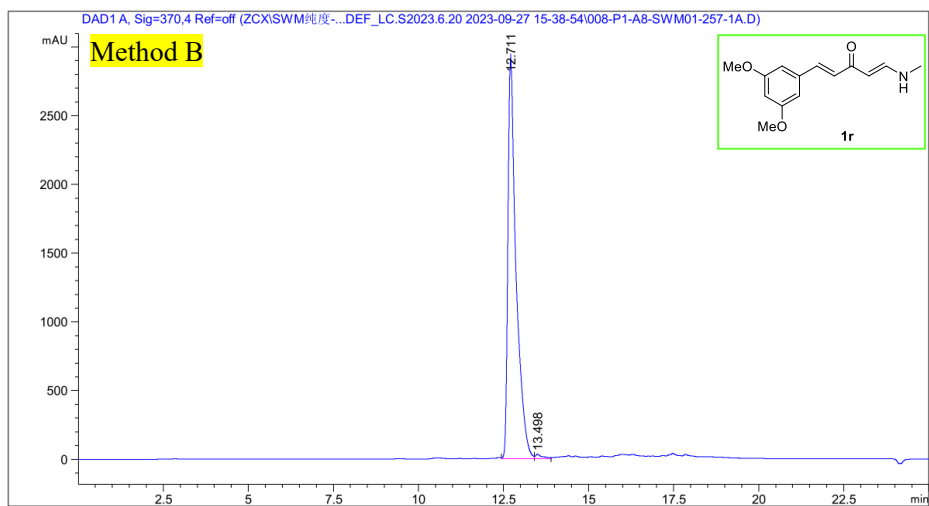

<Peak Table>

| Peak  | Ret.time [min] | Area [mAU*s] | Height [mAU] | Area %  |
|-------|----------------|--------------|--------------|---------|
| 1     | 12.711         | 4.89096e4    | 2946.58740   | 99.0220 |
| 2     | 13.498         | 483.06485    | 32.63512     | 0.9780  |
| Total |                | 4.93927e4    | 2979.22253   | 100%    |

## Supplementary Information

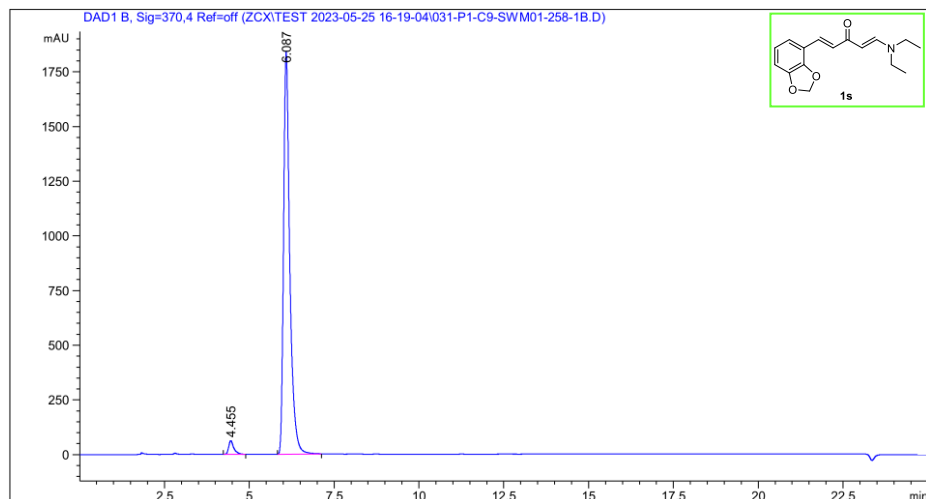

<Peak Table>

| Peak  | Ret.time [min] | Area [mAU*s] | Height [mAU] | Area %  |
|-------|----------------|--------------|--------------|---------|
| 1     | 4.455          | 663.22437    | 62.63724     | 2.7396  |
| 2     | 6.087          | 2.35460e4    | 1839.85803   | 97.2604 |
| Total |                | 2.42092e4    | 1902.49527   | 100%    |

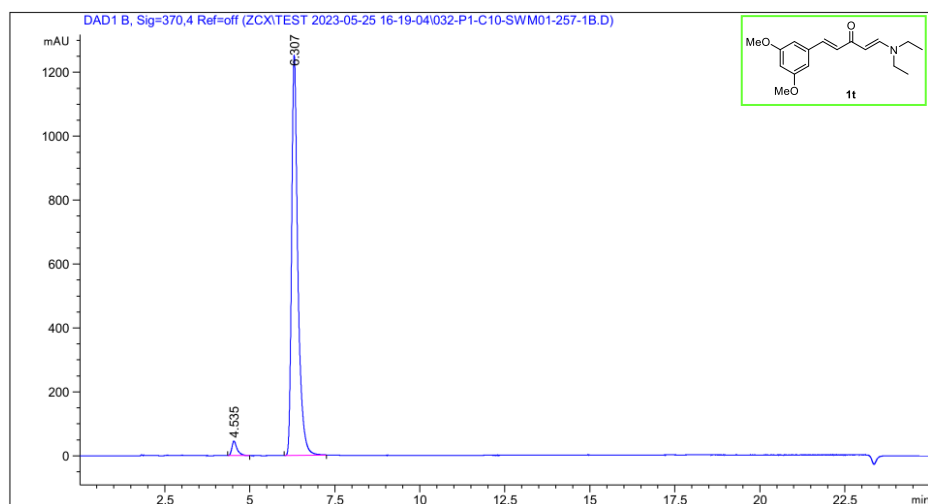

<Peak Table>

| Peak  | Ret.time [min] | Area [mAU*s] | Height [mAU] | Area %  |
|-------|----------------|--------------|--------------|---------|
| 1     | 4.535          | 493.78650    | 45.76043     | 2.9839  |
| 2     | 6.307          | 1.60547e4    | 1253.5633    | 97.0161 |
| Total |                | 1.65485e4    | 1299.32378   | 100%    |

## Supplementary Information

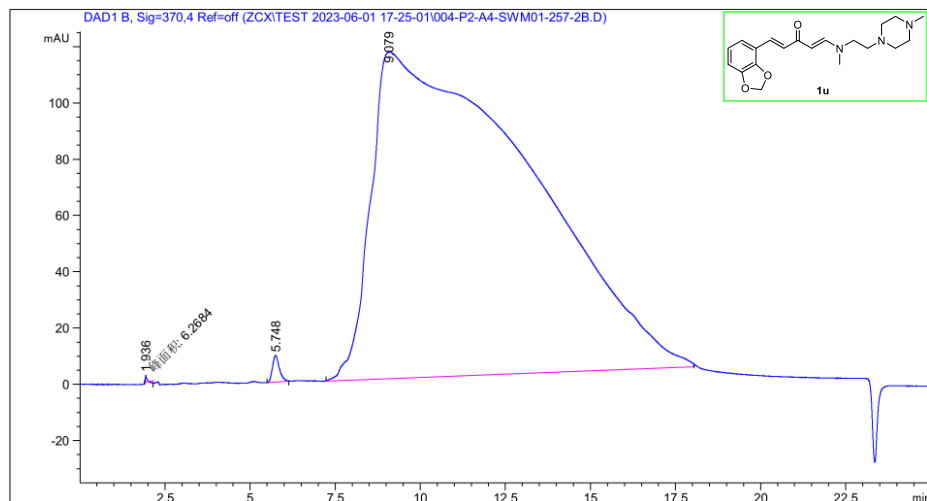

<Peak Table>

| Peak  | Ret.time [min] | Area [mAU*s] | Height [mAU] | Area %  |
|-------|----------------|--------------|--------------|---------|
| 1     | 1.936          | 6.26840      | 2.42329      | 0.0166  |
| 2     | 5.748          | 132.82443    | 9.44076      | 0.3514  |
| 3     | 9.079          | 3.76591e4    | 116.08568    | 99.6320 |
| Total |                | 3.77982e4    | 127.94973    | 100%    |

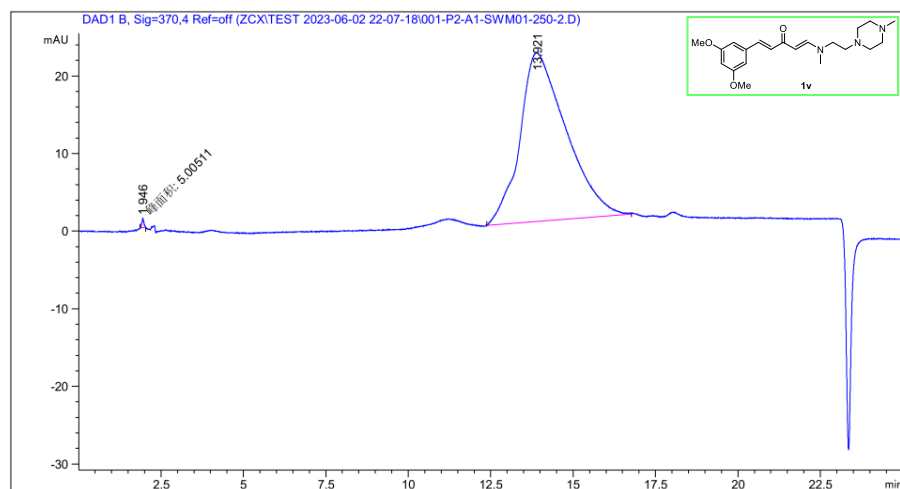

<Peak Table>

| Peak  | Ret.time [min] | Area [mAU*s] | Height [mAU] | Area %  |
|-------|----------------|--------------|--------------|---------|
| 1     | 1.946          | 5.00511      | 1.20556      | 0.2363  |
| 2     | 13.921         | 2112.78589   | 21.69192     | 99.7637 |
| Total |                | 2117.79100   | 22.89748     | 100%    |

## Supplementary Information

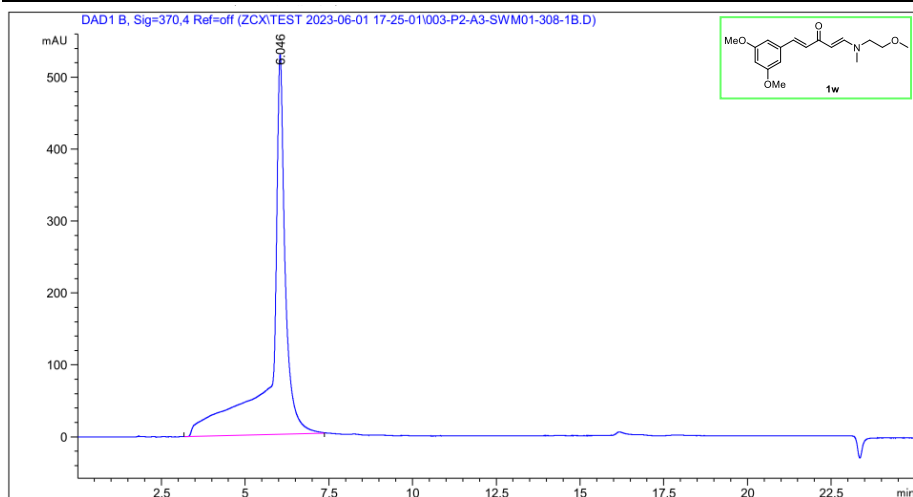

<Peak Table>

| Peak  | Ret.time<br>[min] | Area<br>[mAU*s] | Height<br>[mAU] | Area<br>% |
|-------|-------------------|-----------------|-----------------|-----------|
| 1     | 6.046             | 1.51852e4       | 528.68500       | 100.0000  |
| Total |                   | 1.51852e4       | 528.68500       | 100%      |

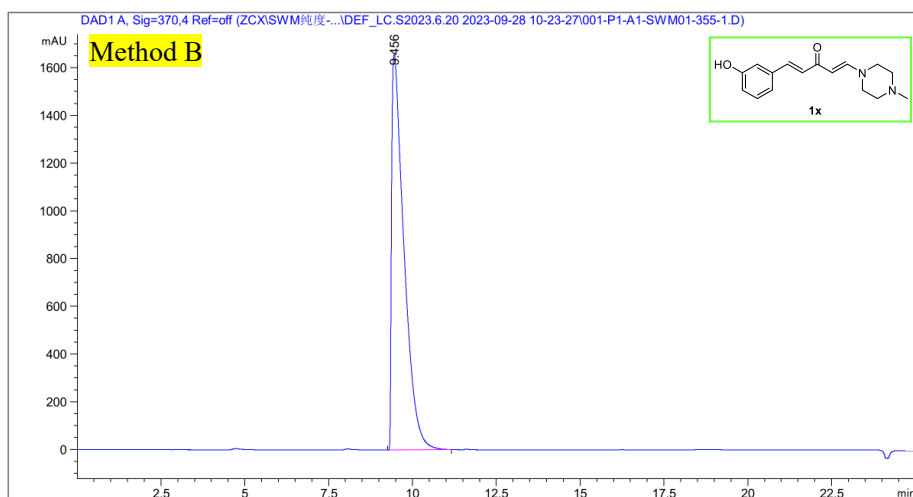

<Peak Table>

| Peak  | Ret.time<br>[min] | Area<br>[mAU*s] | Height<br>[mAU] | Area<br>% |
|-------|-------------------|-----------------|-----------------|-----------|
| 1     | 9.456             | 4.24587e4       | 1657.81506      | 100.0000  |
| Total |                   | 4.24587e4       | 1657.81506      | 100%      |

## Supplementary Information

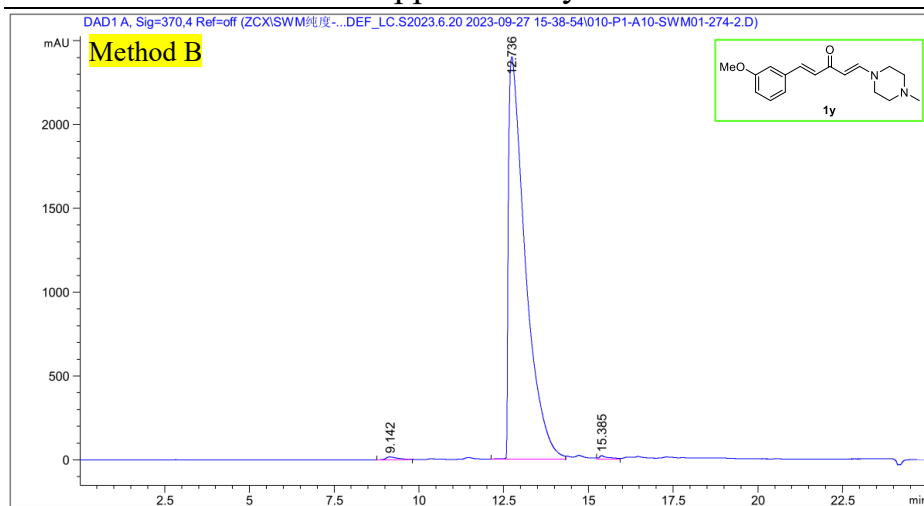

<Peak Table>

| Peak  | Ret.time [min] | Area [mAU*s] | Height [mAU] | Area %  |
|-------|----------------|--------------|--------------|---------|
| 1     | 9.142          | 357.65002    | 15.96362     | 0.4280  |
| 2     | 12.736         | 8.28006e4    | 2401.56860   | 99.0839 |
| 3     | 15.385         | 407.93777    | 21.25139     | 0.4882  |
| Total |                | 8.35662e4    | 2438.78361   | 100%    |

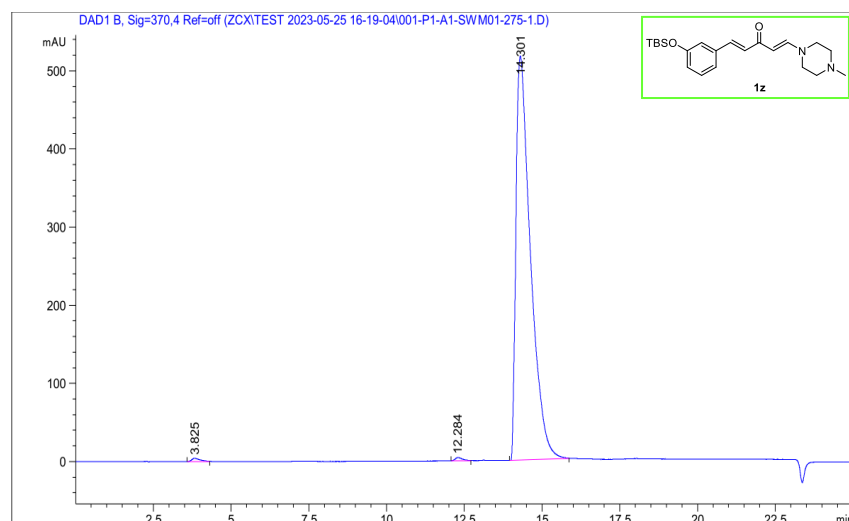

<Peak Table>

| Peak  | Ret.time [min] | Area [mAU*s] | Height [mAU] | Area %  |
|-------|----------------|--------------|--------------|---------|
| 1     | 3.825          | 78.59293     | 4.09885      | 0.4648  |
| 2     | 12.284         | 64.59892     | 4.07131      | 0.3820  |
| 3     | 14.301         | 1.67658e4    | 516.88727    | 99.1532 |
| Total |                | 1.69090e4    | 525.05743    | 100%    |

## Supplementary Information

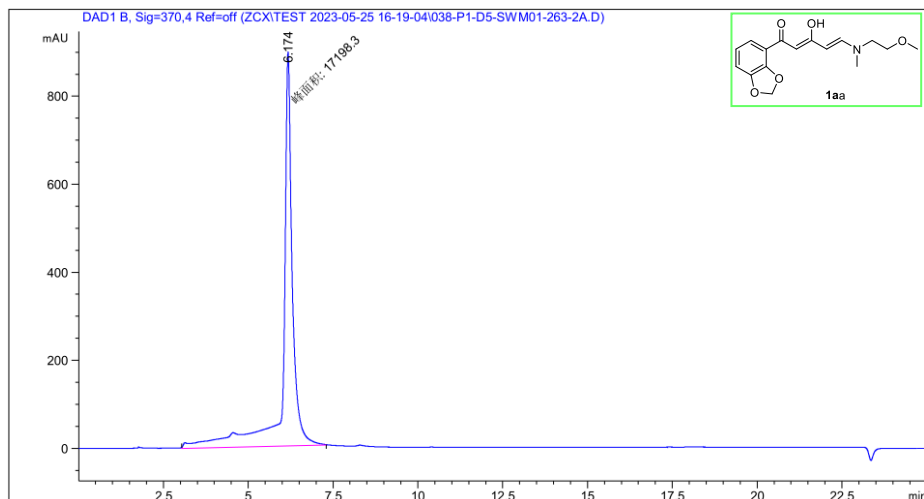

<Peak Table>

| Peak  | Ret.time [min] | Area [mAU*s] | Height [mAU] | Area %   |
|-------|----------------|--------------|--------------|----------|
| 1     | 6.174          | 1.71983e4    | 895.33038    | 100.0000 |
| Total |                | 1.71983e4    | 895.33038    | 100%     |

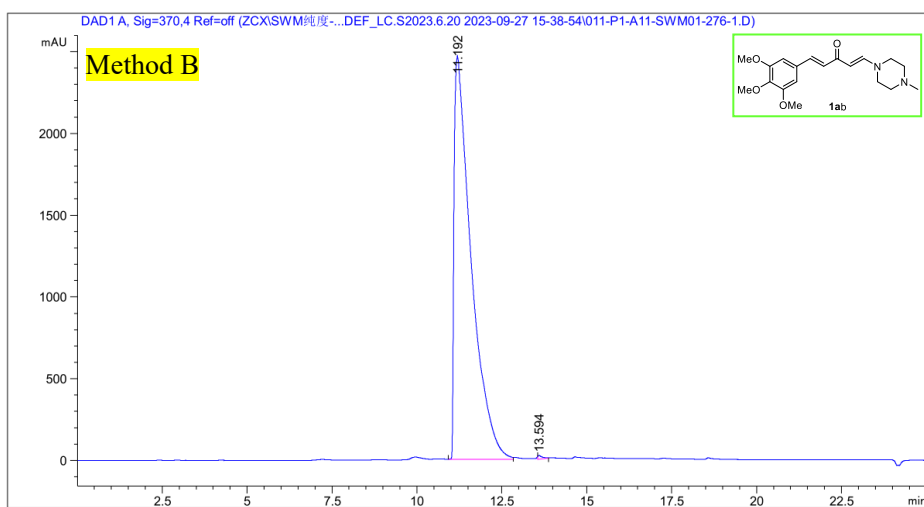

<Peak Table>

| Peak  | Ret.time [min] | Area [mAU*s] | Height [mAU] | Area %  |
|-------|----------------|--------------|--------------|---------|
| 1     | 11.192         | 8.58173e4    | 2467.00391   | 99.7307 |
| 2     | 13.594         | 231.75595    | 23.57927     | 0.2693  |
| Total |                | 8.60490e4    | 2490.58317   | 100%    |

## Supplementary Information

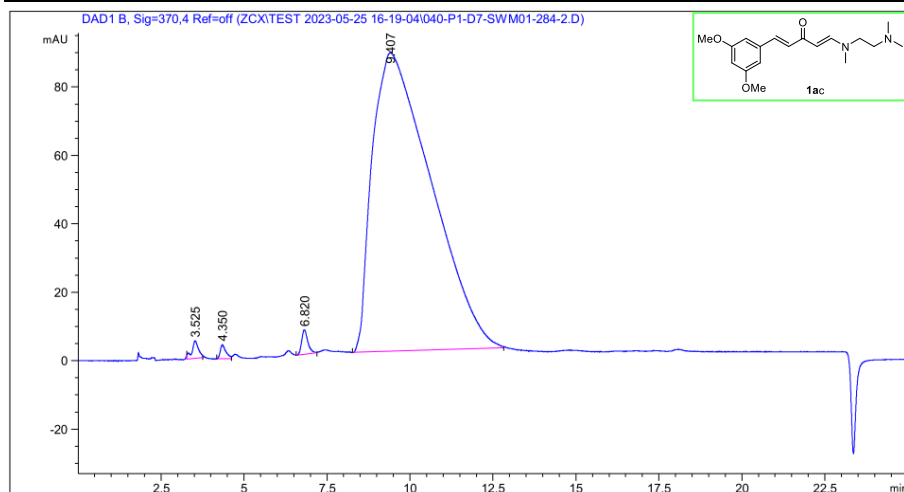

<Peak Table>

| Peak  | Ret.time [min] | Area [mAU*s] | Height [mAU] | Area %  |
|-------|----------------|--------------|--------------|---------|
| 1     | 3.525          | 70.43506     | 5.16814      | 0.6409  |
| 2     | 4.350          | 49.31139     | 4.09085      | 0.4487  |
| 3     | 6.820          | 92.20303     | 7.16729      | 0.8390  |
| 4     | 9.407          | 1.07782e4    | 87.23535     | 98.0715 |
| Total |                | 1.09901e4    | 103.66163    | 100%    |

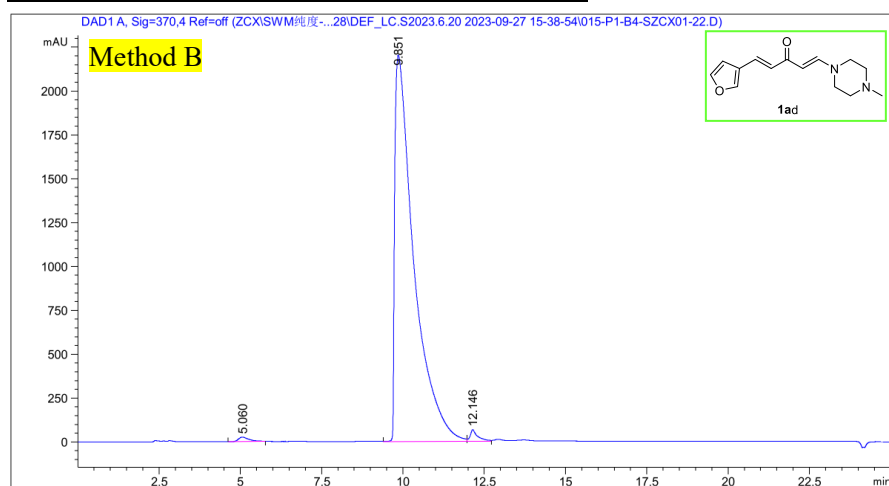

<Peak Table>

| Peak  | Ret.time [min] | Area [mAU*s] | Height [mAU] | Area %  |
|-------|----------------|--------------|--------------|---------|
| 1     | 5.060          | 600.08527    | 26.09184     | 0.6584  |
| 2     | 9.851          | 8.94771e4    | 2202.93823   | 98.1703 |
| 3     | 12.146         | 1067.59460   | 66.21528     | 1.1713  |
| Total |                | 9.11448e4    | 2295.24535   | 100%    |

## Supplementary Information

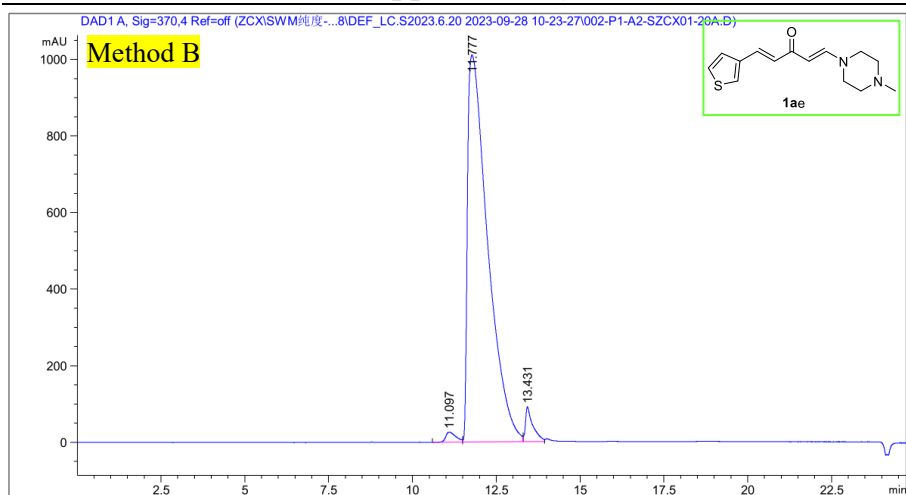

<Peak Table>

| Peak  | Ret.time [min] | Area [mAU*s] | Height [mAU] | Area %  |
|-------|----------------|--------------|--------------|---------|
| 1     | 11.097         | 553.53833    | 26.41023     | 1.2524  |
| 2     | 11.777         | 4.22460e4    | 1011.09528   | 95.5810 |
| 3     | 13.431         | 1399.60962   | 90.61752     | 3.1666  |
| Total |                | 4.41992e4    | 1128.12303   | 100%    |

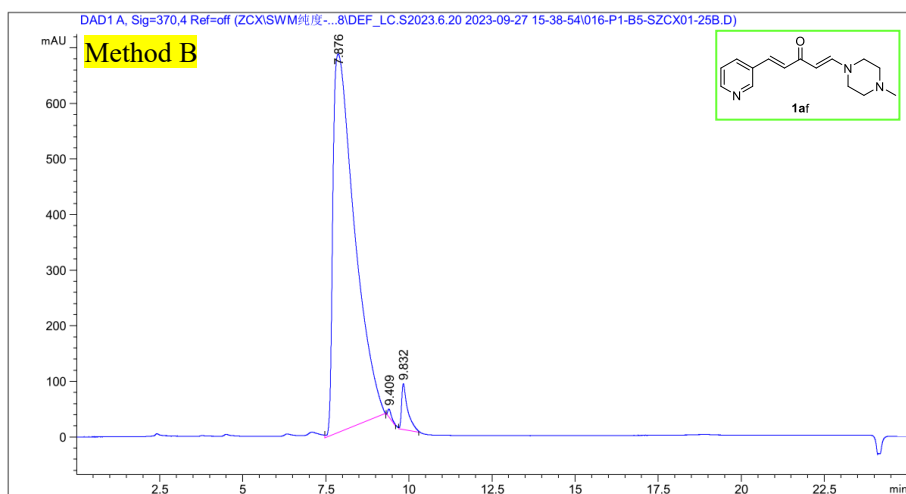

<Peak Table>

| Peak  | Ret.time [min] | Area [mAU*s] | Height [mAU] | Area %  |
|-------|----------------|--------------|--------------|---------|
| 1     | 7.876          | 3.07036e4    | 681.11041    | 96.3592 |
| 2     | 9.409          | 115.73919    | 14.94840     | 0.3632  |
| 3     | 9.832          | 1044.35144   | 82.30061     | 3.2776  |
| Total |                | 3.18637e4    | 778.35943    | 100%    |



## Supplementary Information

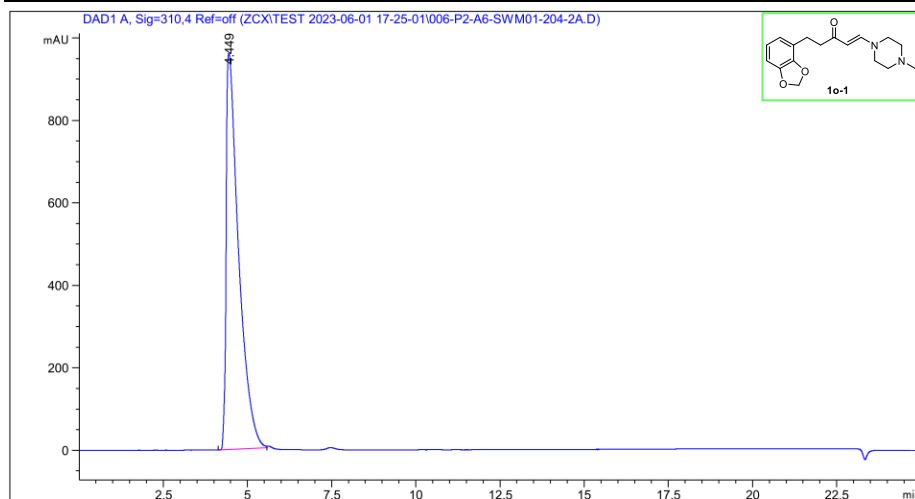

<Peak Table>

| Peak  | Ret.time [min] | Area [mAU*s] | Height [mAU] | Area %   |
|-------|----------------|--------------|--------------|----------|
| 1     | 4.449          | 2.47348e4    | 960.67657    | 100.0000 |
| Total |                | 2.47348e4    | 960.67657    | 100%     |

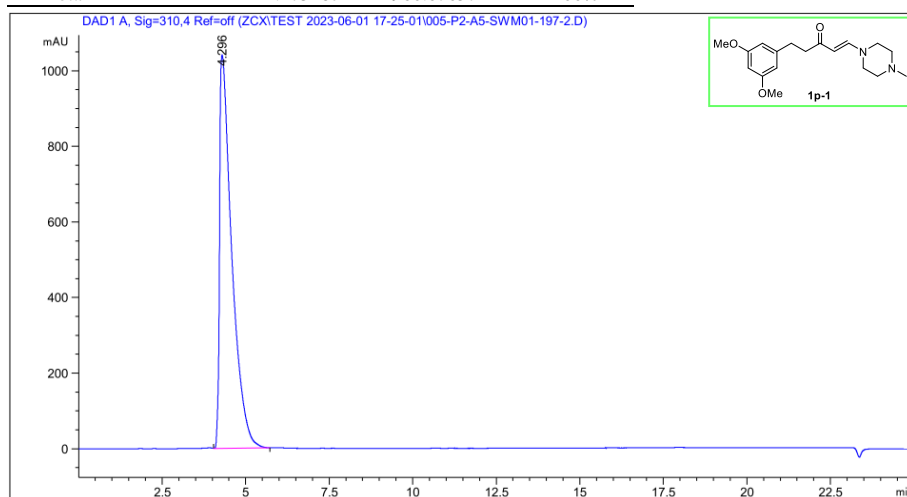

<Peak Table>

| Peak  | Ret.time [min] | Area [mAU*s] | Height [mAU] | Area %   |
|-------|----------------|--------------|--------------|----------|
| 1     | 4.296          | 2.64416e4    | 1040.63379   | 100.0000 |
| Total |                | 2.64416e4    | 1040.63379   | 100%     |

## Supplementary Information

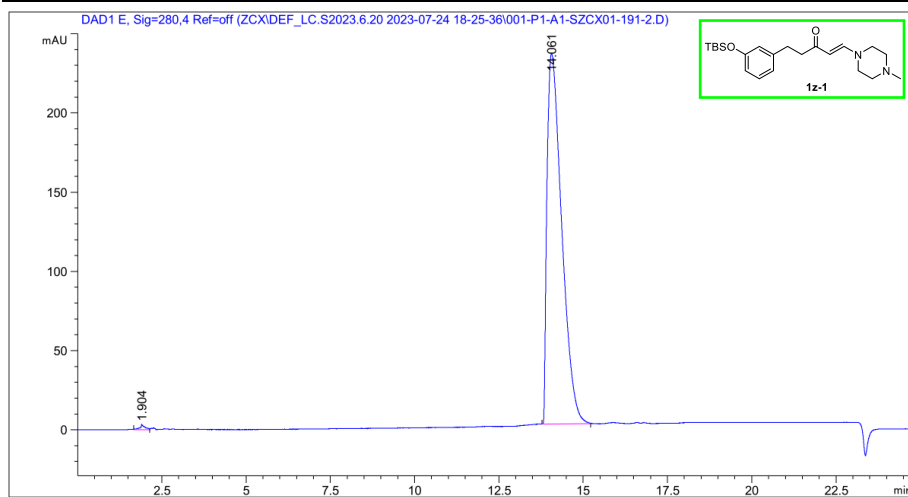

<Peak Table>

| Peak  | Ret.time<br>[min] | Area<br>[mAU*s] | Height<br>[mAU] | Area<br>% |
|-------|-------------------|-----------------|-----------------|-----------|
| 1     | 1.904             | 35.51863        | 3.29083         | 0.4995    |
| 2     | 14.061            | 7075.33838      | 233.84167       | 99.5005   |
| Total |                   | 7110.85701      | 237.13250       | 100%      |

### 6. References

- [1] Shao, L.-D.; Su, J.; Ye, B.; Liu, J.-X.; Zuo, Z.-L.; Li, Y.; Wang, Y.-Y.; Xia, C.; Zhao, Q.-S., Design, Synthesis, and Biological Activities of Vibsanin B Derivatives: A New Class of HSP90 C-Terminal Inhibitors. *Journal of Medicinal Chemistry* **2017**, *60* (21), 9053-9066.
- [2] Khandelwal, A.; Kent, C. N.; Balch, M.; Peng, S.; Mishra, S. J.; Deng, J.; Day, V. W.; Liu, W.; Subramanian, C.; Cohen, M.; Holzbeierlein, J. M.; Matts, R.; Blagg, B. S. J., Structure-guided design of an Hsp90 $\beta$  N-terminal isoform-selective inhibitor. *Nature Communications* **2018**, *9* (1), 425.
